# Supplementary material for: Use of Patient-Reported Outcomes Measurement Information System (PROMIS) measures to characterise health status for patients seeking care from an orthopaedic provider: a retrospective cohort study
Source: PubMed Central journal article supplement — BMJ Open. 2021 Sep 2;11(9):e047156. doi: 10.1136/bmjopen-2020-047156 (PMC8413970; doi:10.1136/bmjopen-2020-047156), 2021-09-02
Supplement: bmjopen-2020-047156.draft_revisions.pdf [file bmjopen-2020-047156.draft_revisions.pdf]

# BMJ Open

BMJ Open is committed to open peer review. As part of this commitment we make the peer review history of every article we publish publicly available.

When an article is published we post the peer reviewers' comments and the authors' responses online. We also post the versions of the paper that were used during peer review. These are the versions that the peer review comments apply to.

The versions of the paper that follow are the versions that were submitted during the peer review process. They are not the versions of record or the final published versions. They should not be cited or distributed as the published version of this manuscript.

BMJ Open is an open access journal and the full, final, typeset and author-corrected version of record of the manuscript is available on our site with no access controls, subscription charges or pay-per-view fees (<http://bmjopen.bmj.com>).

If you have any questions on BMJ Open's open peer review process please email [info.bmjopen@bmj.com](mailto:info.bmjopen@bmj.com)

# BMJ Open

## Use of Patient-Reported Outcome Measurement Information System® (PROMIS®) measures to characterize health status for patients seeking care from an orthopedic provider: A retrospective cohort

|                               |                                                                                                                                                                                                                                                                                                                                                                                              |
|-------------------------------|----------------------------------------------------------------------------------------------------------------------------------------------------------------------------------------------------------------------------------------------------------------------------------------------------------------------------------------------------------------------------------------------|
| Journal:                      | <i>BMJ Open</i>                                                                                                                                                                                                                                                                                                                                                                              |
| Manuscript ID                 | bmjopen-2020-047156                                                                                                                                                                                                                                                                                                                                                                          |
| Article Type:                 | Original research                                                                                                                                                                                                                                                                                                                                                                            |
| Date Submitted by the Author: | 19-Nov-2020                                                                                                                                                                                                                                                                                                                                                                                  |
| Complete List of Authors:     | Horn, Maggie; Duke University School of Medicine, Reinke, Emily; Duke University School of Medicine<br>Yan, Xiaofang; Duke Clinical Research Institute<br>Luo, Sheng; Duke University,<br>Bolognesi, Michael; Duke University,<br>Reeve, Bryce B.; University of North Carolina at Chapel Hill Gillings School of Global Public Health,<br>George, Steven; Duke Clinical Research Institute, |
| Keywords:                     | Musculoskeletal disorders < ORTHOPAEDIC & TRAUMA SURGERY, Foot & ankle < ORTHOPAEDIC & TRAUMA SURGERY, Knee < ORTHOPAEDIC & TRAUMA SURGERY, Spine < ORTHOPAEDIC & TRAUMA SURGERY                                                                                                                                                                                                             |
|                               |                                                                                                                                                                                                                                                                                                                                                                                              |

SCHOLARONE™  
Manuscripts

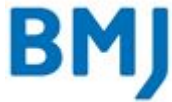

I, the Submitting Author has the right to grant and does grant on behalf of all authors of the Work (as defined in the below author licence), an exclusive licence and/or a non-exclusive licence for contributions from authors who are: i) UK Crown employees; ii) where BMJ has agreed a CC-BY licence shall apply, and/or iii) in accordance with the terms applicable for US Federal Government officers or employees acting as part of their official duties; on a worldwide, perpetual, irrevocable, royalty-free basis to BMJ Publishing Group Ltd ("BMJ") its licensees and where the relevant Journal is co-owned by BMJ to the co-owners of the Journal, to publish the Work in this journal and any other BMJ products and to exploit all rights, as set out in our [licence](#).

The Submitting Author accepts and understands that any supply made under these terms is made by BMJ to the Submitting Author unless you are acting as an employee on behalf of your employer or a postgraduate student of an affiliated institution which is paying any applicable article publishing charge ("APC") for Open Access articles. Where the Submitting Author wishes to make the Work available on an Open Access basis (and intends to pay the relevant APC), the terms of reuse of such Open Access shall be governed by a Creative Commons licence – details of these licences and which [Creative Commons](#) licence will apply to this Work are set out in our licence referred to above.

Other than as permitted in any relevant BMJ Author's Self Archiving Policies, I confirm this Work has not been accepted for publication elsewhere, is not being considered for publication elsewhere and does not duplicate material already published. I confirm all authors consent to publication of this Work and authorise the granting of this licence.

1  
2  
3 Title: Use of Patient-Reported Outcome Measurement Information System® (PROMIS®) measures to  
4  
5  
6 characterize health status for patients seeking care from an orthopedic provider: A retrospective cohort  
7  
8  
9

10 Corresponding Author: Maggie E Horn DPT, MPH, PhD<sup>1,2</sup>

11  
12 Duke University, Box 10042, Durham, NC 27710, 919-684-1365, [maggie.horn@duke.edu](mailto:maggie.horn@duke.edu)

13  
14 Emily K. Reinke, PhD<sup>1</sup>

15  
16 Xiaofang Yang, PhD<sup>3</sup>

17  
18 Sheng Luo, PhD<sup>2,3</sup>

19  
20 Michael P Bolognesi, MD<sup>1</sup>

21  
22 Bryce B. Reeve, PhD<sup>2,3</sup>

23  
24 Steven Z George PT, PhD<sup>1,3</sup>

25  
26  
27 <sup>1</sup>Duke University, Department of Orthopaedic Surgery, Division of Physical Therapy, Durham, USA

28  
29 <sup>2</sup>Duke University, Department of Population Health Sciences, Durham, USA

30  
31 <sup>3</sup>Duke University, Duke Clinical Research Institute, Durham, USA

32  
33  
34  
35  
36 **Word count:** Abstract, 297; Body, 3514  
37  
38  
39  
40  
41  
42  
43  
44  
45  
46  
47  
48  
49  
50  
51  
52  
53  
54  
55  
56  
57  
58  
59  
60

## ABSTRACT

**Objectives:** Characterize the health status of patients newly consulting an orthopedic specialist across eight clinical subspecialties.

**Design:** Retrospective cohort

**Setting:** 18 orthopedic clinics, including seven subspecialties (14 ambulatory and four hospital-based) within an academic health system.

**Participants:** 14,910 patients consulting an orthopaedic specialist for a new patient consultation who completed baseline Patient-Reported Outcome Measurement Information System (PROMIS) measures associated with their appointment from November 2017 - December 2019. Patients were  $55.72 \pm 5.8$  years old, 61.3% female and 79.3% Caucasian, and were 13.4% Black or African American. Patients who did not complete PROMIS measures or canceled their appointment were excluded from the study.

**Primary Outcome:** PROMIS domains of physical function, pain interference, pain intensity, depression, anxiety, fatigue, sleep disturbance, and the ability to participate in social roles.

**Results:** Mean PROMIS scores for physical function was ( $38.1 \pm 9.2$ ), pain interference ( $58.9 \pm 8.1$ ), pain intensity ( $4.6 \pm 2.5$ ), depression ( $47.9 \pm 8.9$ ), anxiety ( $49.9 \pm 9.5$ ), fatigue ( $50.5 \pm 10.3$ ), sleep disturbance ( $51.1 \pm 9.8$ ), and ability to participate in social roles ( $49.1 \pm 10.3$ ). Across the clinical subspecialties, Neurosurgery, Spine, and Trauma patients were most profoundly affected across almost all domains, and patients consulting with a Hand specialist reported the least limitations. There was a moderate, negative correlation between pain interference and physical functioning ( $r = -0.59$ ) and low correlations between pain interference with anxiety

1  
2  
3 (r=0.36), depression (r=0.39) as well as physical function and anxiety (r=-0.32) and depression (r=-0.30) and  
4  
5  
6  
7 sleep (r=-0.31).  
8

9  
10 **Conclusions:** We directly compared clinically meaningful PROMIS domains across eight orthopedic  
11  
12 subspecialties, which would not be possible with legacy measures alone. These results support PROMIS's  
13  
14 utility as a common metric to assess and compare patient health status across multiple orthopedic  
15  
16 subspecialties.  
17

## 18 **ARTICLE SUMMARY**

### 19 **Strengths and Limitations of this Study**

- 20  
21  
22 ● This study demonstrated the direct comparison of health status using PROMIS measures across eight  
23  
24 orthopedic clinical subspecialties, which was previously a challenge using legacy outcome measures.  
25
- 26  
27 ● This study reported the association of eight clinically relevant PROMIS domains within an orthopedic  
28  
29 cohort.  
30
- 31  
32 ● Participants in this study completed PROMIS measures as part of routine clinical assessment  
33  
34 associated with a new patient consultation with an orthopaedic specialist.  
35
- 36  
37 ● We evaluated PROMIS measures at baseline only; no follow up data was analyzed in the context of  
38  
39 downstream healthcare utilization.  
40
- 41  
42 ● The findings' generalizability is limited by data collected within a private health system setting that may  
43  
44 not reflect other health systems' characteristics.  
45

46  
47  
48  
49  
50  
51  
52  
53  
54  
55  
56  
57  
58  
59  
60  
**Key Words:** Patient-reported outcome measures, orthopedics, health status, physical function, pain

## INTRODUCTION

To determine if a patient has achieved treatment success, it is insufficient to evaluate treatment results solely on medical history, physical findings, laboratory tests, or imaging findings alone.[1] While these are essential clinical indicators, they may not reflect what is most important to a patient. Patient-reported outcome measures (PROMs) are additional indicators that come directly from the patient. PROMs may address more important patient-centered outcomes about a patient's health status's physical, mental, and social aspects. Change in health status can be one of the measures of "success" from a patient's perspective after an orthopedic procedure.[2] PROMs are increasingly being used as part of the clinical encounter to guide treatment decisions and determine intervention effectiveness. [3]

"Legacy" patient-reported outcome measures (PROs) have been used for decades; however, they have many limitations.[4] To overcome the limitations of legacy measures the NIH developed a universally accepted set of PROMs. The NIH's Patient-Reported Outcomes Measurement Information System® (PROMIS®) covers a broad range of relevant domains and has strong evidence for its validity and reliability in a broad range of populations.[5–8] In orthopedics, the use of PROMIS measures has distinct advantages because it can be used across many clinical subspecialties as a common outcome metric. [8–10] This has the opportunity to allow for the evaluation of the efficacy of different interventions and inform quality improvement initiatives.[11]

Recently, there has been an increase in the adoption of PROMIS measures as the standard outcome measurement system in Orthopaedics to assess health status in orthopedic patients.[8] However, what is unknown about the use of PROMIS measures in orthopedics is how these measures differ across patients seeking care from different orthopedic clinical subspecialties. Therefore, there are two goals of this study. First, we will characterize the health status of a cohort of patients completing PROMIS measures as part of the clinical encounter by comparing the physical health (6 domains) and mental health (2 domains) across eight different clinical subspecialty areas in a large academic medical center. Second, we will examine the correlation between the PROMIS domains in this cohort.

## METHODS

## Study Setting and Participants

Patients consulting an Orthopaedic specialist (surgeon or advanced practice provider- nurse practitioner or physician assistant) for a new patient consultation from November 2017 - December 2019 were included in the study. In this study, patients sought care within the Department of Orthopaedic surgery at a large academic, private medical center in Durham, NC. Inclusion criteria for the study were patients aged 18 years and over and completion of assigned PROMIS measures. We excluded patients from the study who completed PROMIS measures but canceled or did not attend their scheduled appointments. The department includes 18 adult clinics (14 ambulatory and four hospital-based clinics). The department consists of eight subspecialties (Joint Reconstruction, Spine, Neurosurgery, Sports Medicine, Trauma, Orthopaedic Oncology, Foot and Ankle, and Hand) with over 100 Orthopaedic specialists. We extracted data for this study directly from the electronic health record (EHR).

## Standardized Collection of PROMIS Measures

In December of 2017, the orthopedics department implemented a standardized collection of PROMIS measures across 18 clinics and eight clinical subspecialties. The administration of PROMIS measures was linked to new patient appointments and collected and scored passively within the EHR (Epic Systems) as part of the standard of care. Therefore, informed consent was not required for the completion of the PROMIS measures. However, we obtained IRB approval for data extraction and analysis of the collected data for this study.

### *PROMIS Measures*

From November 2017- December of 2018, we collected the short-form version of the following 8 PROMIS domains: physical function (7 items), pain interference (8 items), pain intensity (1 item), depression (8 items), anxiety (8 items), fatigue (8 items), sleep disturbance (8 items) and ability to participate in social roles (8 items). The PROMIS Physical Function domain is a patient's self-reported capability (rather than actual performance) of physical activities. The physical function domain includes the functioning of one's upper extremities (dexterity), lower extremities (walking or mobility), and central regions (neck, back), as well as instrumental activities of daily living, such as running errands.[12] PROMIS Pain Interference measures the



1  
2  
3 consequences of pain on relevant aspects of one's life. The pain interference domain includes the extent to  
4 which pain hinders engagement with social, cognitive, emotional, physical, and recreational activities.[13]  
5 PROMIS pain intensity consists of one question, "How would you rate your pain on average? (0-10, 0=No pain  
6 10=Worst imaginable)".[14] PROMIS emotional distress domains included depression and anxiety. Depression  
7 measures negative mood (sadness, guilt), views of self (self-criticism, worthlessness), and social cognition  
8 (loneliness, interpersonal alienation), as well as decreased positive affect and engagement (loss of interest,  
9 meaning, and purpose).[15] Anxiety domain measures fear (fearfulness, panic), anxious misery (worry, dread),  
10 hyperarousal (tension, nervousness, restlessness), and somatic symptoms related to arousal (racing heart,  
11 dizziness). [16] The PROMIS Sleep Disturbance Perceptions measure sleep quality, sleep depth, and  
12 restoration associated with sleep.[17] The PROMIS fatigue domain measures a range of symptoms, from mild  
13 subjective feelings of tiredness to an overwhelming, debilitating, and sustained sense of exhaustion that likely  
14 decreases one's ability to execute daily activities and function normally in a family or social roles.[18] The  
15 PROMIS Ability to Participate in Social Roles and Activities measures one's perceived ability to perform one's  
16 usual social roles and activities.[19]

17  
18  
19  
20  
21  
22  
23  
24  
25  
26  
27  
28  
29  
30  
31  
32  
33 Each PROMIS domain is scored separately on a T-score metric, where 50 is the mean and 10 is the  
34 standard deviation of the calibration population. For all PROMIS domains (except sleep disturbance) included  
35 in this study, the calibration population is the US general population. A higher score on a domain reflects more  
36 of the measured concept (e.g., more Fatigue, more Physical Function). For example, a physical function score  
37 of 40 indicates the sample's functioning is one standard deviation worse than the average US general  
38 population.[5] Once the computer adaptive testing (CAT) instruments were available within our EHR, on  
39 December 20, 2018, we transitioned to collecting a reduced set of PROMIS domains (physical function, pain  
40 interference, depression, and sleep disturbance) because of concerns about the respondent burden with the  
41 full eight domains. We combined these scores with the respective PROMIS short form scores for the analysis.

## 52 53 **Patient Demographics**

54  
55  
56  
57  
58  
59  
60

1  
2  
3 Patient demographics recorded included patient age at the appointment, sex (male or female), race  
4 (American Indian or Alaskan Native, Asian, Black or African American, Caucasian/White, Native Hawaiian or  
5 Other Pacific Islander, Not Reported/Declined, Other and two or more races), ethnicity (Hispanic, Not  
6 Hispanic/Latino, Not Reported/Declined), marital status (Divorced, Legally Separated, Life Partner, Married,  
7 Single, unknown, widowed), geographical delineation (urban or rural) and primary and secondary insurance  
8 type (Medicare, Medicaid, workers compensation, private).  
9  
10  
11  
12  
13  
14  
15

### 16 **Healthcare Process Variables**

17  
18  
19 In this sample, we collected information related to the new patient consultation, including; visit date,  
20 clinic location and type (ambulatory vs. hospital-based), provider type (orthopedic physician or advanced  
21 practice provider-nurse practitioner or physician assistant), and provider specialty (Joint Reconstruction, Spine,  
22 Neurosurgery, Sports Medicine, Trauma, Orthopaedic Oncology, Foot and Ankle, and Hand).  
23  
24  
25  
26  
27

### 28 **Data Analysis**

29  
30  
31 We performed data analysis using R Statistical Software version R 4.0.2.[20]  
32  
33

34 This study's primary purpose was to characterize the health status of patients seeking care from eight  
35 orthopedic subspecialties in the Department of Orthopaedic Surgery. We calculated descriptive statistics to  
36 characterize the cohort. Means and standard deviations were reported for continuous variables, and  
37 percentages were reported for categorical variables. Cohort characteristics were compared across clinical  
38 subspecialties using chi-square analysis for categorical variables and 1-way analyses of variance for  
39 continuous variables. We calculated the mean and standard deviation of PROMIS domain scores for the cohort  
40 and across each specialty using t-tests. We then calculated the percentage of patients in the total cohort and  
41 each clinical subspecialty by severity categories for each PROMIS domain: within normal limits, mild,  
42 moderate, and severe.[10,21,22] Lastly, we performed Pearson correlation analyses to determine the  
43 association of the 8 PROMIS domains in the cohort. We defined the magnitude of correlation as follows: low  
44  
45  
46  
47  
48  
49  
50  
51  
52  
53  
54  
55  
56  
57  
58  
59  
60

correlation - 0.10-0.39, moderate correlation - 0.40-0.69, high correlation - 0.70- 0.89 and very high correlation - 0.90-1.00.[23]

## Patient and Public Involvement

There was no involvement from patients or members of the public in the design, or conduct, or reporting, or dissemination plans of this study.

## RESULTS

### Cohort Demographics

Our study included 14,910 patients who consulted an Orthopaedic specialist for a new patient consultation and completed baseline PROMIS measures. Of the entire sample, 61.3% (n=9,137) were female with a mean age of 55.72(15.8). Most of the sample reported being Caucasian (79.3% (n=11,831)) and 13.4% (n=2,001) were Black or African American. Our sample's self-reported ethnicity was 93.7% (n=13976) Not Hispanic/Latino and 1.9% (n=285) Hispanic. The majority of patients in the sample were married (64.1%, n=9,553). The geographic dispersion of the sample included 83.8% (n=12,488) residing in urban areas and 8.6% (n=1,276) residing in rural areas in North Carolina. The primary insurance of the sample was predominantly private (90.3%, n=13,465) followed by Medicare (7.3%, n=1,088) and Medicaid (2.1%, n=311).

See table 1.

**Table 1. Sample Characteristics by Clinical Specialty**

| Provider specialty | Foot and ankle (n=2208) | Hand (n=1858) | Neurosurgery (n=1044) | Orthopaedic Oncology (n=124) | Spine (n=3028) | Sports medicine (n=4197) | Total Joint Arthroplasty (n=2353) | Trauma (n=98) | Total (n=14,910) | P value |
|--------------------|-------------------------|---------------|-----------------------|------------------------------|----------------|--------------------------|-----------------------------------|---------------|------------------|---------|
| Age                | 56.72(15.2)             | 54.63(15.9)   | 56.11(15.3)           | 55.18(15.5)                  | 57.2(15.3)     | 52.68(16.3)              | 59(14.9)                          | 56.18(19.9)   | 55.72(15.8)      | <<0.001 |
| Gender             |                         |               |                       |                              |                |                          |                                   |               |                  |         |
| Female             | 64.1%(1416)             | 61.3%(1138)   | 61.2%(639)            | 51.6%(64)                    | 60.0%(1818)    | 60.3%(2532)              | 62.39%(1468)                      | 63.3%(62)     | 61.3%(9137)      | 0.015   |
| Male               | 35.9%(792)              | 38.8(720)     | 38.8%(405)            | 48.4%(60)                    | 40.0%(1210)    | 39.7%(1665)              | 37.61%(885)                       | 36.7%(36)     | 38.7%(5773)      |         |
| Race               |                         |               |                       |                              |                |                          |                                   |               |                  |         |
| 2 or more races    | 1.2%(26)                | 1.7%(31)      | 0.9%(9)               | 0%(0)                        | 1.4%(42)       | 1.3%(55)                 | 1.0%(24)                          | 3.1%(3)       | 1.3%(190)        | 0.01    |

|                                           |             |             |            |            |             |             |             |           |              |         |
|-------------------------------------------|-------------|-------------|------------|------------|-------------|-------------|-------------|-----------|--------------|---------|
| American Indian or Alaskan Native         | 0.2%(4)     | 0.3%(6)     | 0.7%(7)    | 0.8%(1)    | 0.4%(11)    | 0.3%(14)    | 0.2%(4)     | 1.0%(1)   | 0.3%(48)     |         |
| Asian                                     | 1.9%(42)    | 2.1%(54)    | 2.0%(21)   | 2.4%(3)    | 2.2%(65)    | 2.8%(118)   | 1.3%(31)    | 1.0%(1)   | 2.2%(335)    |         |
| Black or African American                 | 12.6%(278)  | 14.9%(278)  | 13.1%(137) | 14.5%(18)  | 12.6%(380)  | 13.4%(564)  | 14.2%(333)  | 13.3%(13) | 13.4%(2001)  |         |
| Caucasian/White                           | 80.6%(1780) | 77.6%(1441) | 80.9%(845) | 79.0%(98)  | 80.5%(2438) | 78.0%(3274) | 79.9%(1879) | 77.6%(76) | 79.3%(11831) |         |
| Native Hawaiian or Other Pacific Islander | 0.1%(1)     | 0.1%(2)     | 0.1%(1)    | 0%(0)      | 0.1%(2)     | 0.1%(4)     | 0.1%(2)     | 0%(0)     | 0.1%(12)     |         |
| Not Reported/ Declined                    | 2.7%(60)    | 2.037       | 1.5%(16)   | 2.4%(3)    | 2.3%(68)    | 3.2%(132)   | 2.6%(60)    | 1.0%(1)   | 2.5%(377)    |         |
| Other                                     | 0.8%(17)    | 0.5(9)      | 0.7%(8)    | 0.8%(1)    | 0.7%(22)    | 0.9%(36)    | 0.9%(20)    | 3.1%(3)   | 0.8%(116)    |         |
| <b>Ethnicity</b>                          |             |             |            |            |             |             |             |           |              |         |
| Hispanic                                  | 1.7%(37)    | 2.4%(45)    | 2.2%(23)   | 0.8%(1)    | 1.9%(57)    | 2.0%(85)    | 1.4%(32)    | 5.1%(5)   | 1.9%(285)    | 0.013   |
| Not Hispanic/Latino                       | 94.4%(2085) | 93.3%(1733) | 94.8%(990) | 92.7%(115) | 94.0%(2846) | 92.9%(3898) | 94.3%(2218) | 92.9%(91) | 93.7%(13976) |         |
| Not Reported/ Declined                    | 3.9%(86)    | 4.3%(80)    | 3.0%(31)   | 6.5%(8)    | 4.1%(125)   | 5.1%(214)   | 4.4%(103)   | 2.0%(2)   | 4.4%(649)    |         |
| <b>Marital Status</b>                     |             |             |            |            |             |             |             |           |              |         |
| Divorced                                  | 6.2%(137)   | 8.0%(149)   | 7.9%(82)   | 5.7%(7)    | 8.3%(251)   | 6.5%(273)   | 8.0%(187)   | 15.3%(15) | 7.4%(1101)   | <<0.001 |
| Legally Separated                         | 0.9%(20)    | 1.1%(21)    | 1.0%(10)   | 0.8%(1)    | 1.1%(32)    | 1.1%(47)    | 0.4%(9)     | 1.0%(1)   | 0.9%(141)    |         |
| Life Partner                              | 0.8%(17)    | 0.6%(11)    | 0.5%(5)    | 0%(0)      | 0.3%(10)    | 0.5%(19)    | 0.3%(6)     | 1.0%(1)   | 0.5%(69)     |         |
| Married                                   | 65.4%(1445) | 61.9%(1150) | 66.6%(695) | 71.8%(89)  | 66.1%(2002) | 61.3%(2572) | 66.0%(1552) | 49.0%(48) | 64.1%(9553)  |         |
| Single                                    | 18.4%(406)  | 19.8%(367)  | 16.6%(173) | 18.6%(23)  | 15.9%(482)  | 22.4%(939)  | 17.3%(408)  | 26.5%(26) | 18.9%(2824)  |         |
| Unknown                                   | 3.6%(80)    | 4.1%(76)    | 2.6%(27)   | 0.8%(1)    | 3.1%(94)    | 4.7%(199)   | 2.6%(61)    | 0%(0)     | 3.6%(538)    |         |
| Widowed                                   | 4.7%(103)   | 4.5%(84)    | 5.0%(52)   | 2.4%(3)    | 5.2%(157)   | 3.5%(148)   | 5.5%(130)   | 7.1%(7)   | 4.6%(684)    |         |
| <b>Geographic Location</b>                |             |             |            |            |             |             |             |           |              |         |
| Rural, NC                                 | 7.2%(158)   | 7.4%(138)   | 11.9%(124) | 12.1%(15)  | 9.7%(295)   | 7.3%(308)   | 9.4%(221)   | 17.4%(17) | 8.6%(1276)   | <<0.001 |
| Urban, NC                                 | 82.4%(1820) | 87.2%(1621) | 77.1%(805) | 72.6%(90)  | 82.3%(2491) | 87.5%(3671) | 81.3%(1914) | 77.6%(76) | 83.8%(12488) |         |
| Other                                     | 10.4%(230)  | 5.3%(99)    | 11.0%(115) | 15.3%(19)  | 8.0%(242)   | 5.2%(218)   | 9.3%(218)   | 5.1%(5)   | 7.7%(1146)   |         |

|                                            |             |             |            |            |             |             |             |            |              |         |
|--------------------------------------------|-------------|-------------|------------|------------|-------------|-------------|-------------|------------|--------------|---------|
| <b>Primary Insurance</b>                   |             |             |            |            |             |             |             |            |              |         |
| Medicare                                   | 25.2%(556)  | 20.8%(387)  | 25.9%(270) | 23.4%(29)  | 27.2%(823)  | 17.6%(738)  | 28.9%(679)  | 32.7%(32)  | 23.6%(3514)  | <<0.001 |
| Medicaid                                   | 0.5%(10)    | 0.9%(17)    | 2.5%(26)   | 3.2%(4)    | 1.9%(58)    | 0.8%(33)    | 0.6%(15)    | 2.0%(2)    | 1.1%(165)    |         |
| Worker's Compensation                      | 0.9%(20)    | 1.9%(35)    | 0.6%(6)    | 0.8%(1)    | 0.4%(12)    | 1%(42)      | 0.9%(21)    | 1.0%(1)    | 0.9%(138)    |         |
| Privately Insured                          | 73.5%(1622) | 76.4%(1419) | 71.1%(742) | 72.6%(90)  | 70.5%(2135) | 80.6%(3384) | 69.6%(1638) | 64.3%(63)  | 74.4%(11093) |         |
| <b>Secondary Insurance</b>                 |             |             |            |            |             |             |             |            |              |         |
| Medicare                                   | 7.7%(169)   | 6.5%(121)   | 8.0%(83)   | 7.3%(9)    | 7.8%(235)   | 5.5%(229)   | 9.8%(231)   | 11.2%(11)  | 7.3%(1088)   | <<0.001 |
| Medicaid                                   | 1.3%(28)    | 1.5%(28)    | 3.7%(39)   | 3.2%(4)    | 3.0%(90)    | 1.6%(67)    | 2.1%(49)    | 6.1%(6)    | 2.1%(311)    |         |
| Worker's Compensation                      | 0.3%(6)     | 0.4%(8)     | 0.3%(3)    | 0%(0)      | 0.3%(8)     | 0.3%(13)    | 0.3%(7)     | 1.0%(1)    | 0.3%(46)     |         |
| Privately Insured                          | 90.8%(2005) | 91.6%(1701) | 88.0%(919) | 89.5%(111) | 89%(2695)   | 92.6%(3888) | 87.8%(2066) | 81.6%(80)  | 90.3%(13465) |         |
| <b>Questionnaire Type Completed</b>        |             |             |            |            |             |             |             |            |              |         |
| PROMIS Short Forms (8 domains)             | 74.7%(1650) | 70.8%(1316) | 71.7%(749) | 76.6%(95)  | 74.1%(2243) | 68.6%(2879) | 64.9%(1526) | 69.4%(68)  | 70.6%(10526) | <<0.001 |
| PROMIS CAT (4 domains)                     | 25.3(558)   | 29.2 (542)  | 28.3(295)  | 23.4%(29)  | 28.9 (785)  | 31.4 (1318) | 35.2(827)   | 30.6(30)   | 29.4 (4384)  |         |
| <b>Year PROMIS Questionnaire Completed</b> |             |             |            |            |             |             |             |            |              |         |
| 2017                                       | 2.9%(65)    | 2.5%(47)    | 3.5%(37)   | 6.5%(8)    | 4.9%(149)   | 3.3%(138)   | 3.3%(77)    | 3.1%(3)    | 3.5%(524)    | <<0.001 |
| 2018                                       | 66.2%(1462) | 63.2%(1175) | 63.1%(659) | 65.3%(81)  | 64.8%(1961) | 61.6%(2587) | 57.5%(1353) | 61.2%(60)  | 62.6%(9338)  |         |
| 2019                                       | 30.8%(681)  | 34.2%(636)  | 33.3%(348) | 28.2%(35)  | 30.3%(918)  | 35.1%(1472) | 39.2%(923)  | 35.71%(35) | 33.9%(5048)  |         |

\*mean(sd), %(n)

## PROMIS Scores

The highest volume of patients in the sample sought care from a sports medicine provider (28.1%, n=4,197) or a spine provider (20.3%, n=3,028), followed by total joint (15.8%, n=2,353), foot and ankle (14.8%,

n=2,208) and hand 12.5%, n=1,858). Orthopedic oncology, neurosurgery, and trauma had fewer than 10% of the total volume of patients in the sample.

As presented in **table 2**, the mean scores for the PROMIS domains for the entire cohort were 38.14(9.2) for physical function, 58.84(8.1) for pain interference, 4.58(2.5) for pain intensity (on a 0 to 10 scale), 47.87(8.9) for depression, 49.86(9.5) for anxiety, 50.49(10.3) for fatigue, 51.08(9.8) for sleep disturbance and 49.05(10.3) for ability to participate in social roles. Higher pain interference and lower physical function were at least 0.5 and 1.0 standard deviations away, respectively, from the average US general population.

**Table 2. Summary of Scores for PROMIS Domains by Clinical Subspecialty**

|                                        | Foot and ankle<br>(n=2208,<br>14.81%) | Hand<br>(n=1858,<br>12.46%) | Neurosurgery<br>(n=1044,<br>7.0%) | Orthopaedic Oncology<br>(n=124,<br>0.8%) | Spine<br>(n=3028,<br>20.31%) | Sports medicine<br>(n=419,<br>28.15%) | Total Joint Arthroplasty<br>(n=2353,<br>15.78%) | Trauma<br>(n=98,<br>0.66%) | Total<br>(n=14,910,<br>100%) |
|----------------------------------------|---------------------------------------|-----------------------------|-----------------------------------|------------------------------------------|------------------------------|---------------------------------------|-------------------------------------------------|----------------------------|------------------------------|
| <b>Physical Health Domains</b>         |                                       |                             |                                   |                                          |                              |                                       |                                                 |                            |                              |
| Physical function                      | 39.49(9.0)                            | 41.85(9.5)                  | 35.04(9.0)                        | 38.35(10.5)                              | 35.45(8.7)                   | 39.51(8.8)                            | 36.58(8.5)                                      | 31.6(10.8)                 | 38.14(9.2)                   |
| Ability to participate in social roles | 50.48(10.2)                           | 52.32(10.4)                 | 44.32(10.4)                       | 47.56(10.8)                              | 46.27(10.0)                  | 50.98(9.8)                            | 47.78(9.7)                                      | 43.58(11.5)                | 49.05(10.3)                  |
| Pain intensity                         | 4.08(2.5)                             | 3.73(2.5)                   | 5.47(2.5)                         | 3.99(2.7)                                | 5.34(2.4)                    | 4.25(2.4)                             | 4.91(2.4)                                       | 4.79(2.6)                  | 4.58(2.2)                    |
| Pain interference                      | 57.2(8.6)                             | 55.65(8.56)                 | 61.53(8.1)                        | 57.23(9.7)                               | 61.13(7.3)                   | 58(7.6)                               | 60.21(7.7)                                      | 61.02(8.4)                 | 58.84(8.1)                   |
| Fatigue                                | 49.22(9.0)                            | 48.67(10.7)                 | 54.88(10.4)                       | 52.04(10.6)                              | 53.18(10.1)                  | 48.81(10.0)                           | 50.21(9.8)                                      | 53.93(10.5)                | 50.49(10.3)                  |
| Sleep                                  | 49.07(9.3)                            | 49.82(9.8)                  | 53.77(10.3)                       | 50.5(9.7)                                | 52.85(9.9)                   | 50.55(9.6)                            | 51.31(9.8)                                      | 53.42(10.9)                | 51.08(9.8)                   |
| <b>Mental Health Domains</b>           |                                       |                             |                                   |                                          |                              |                                       |                                                 |                            |                              |
| Anxiety                                | 48.66(9.0)                            | 49.14(9.8)                  | 52.59(9.9)                        | 53.1(9.2)                                | 51.59(9.6)                   | 48.9(9.2)                             | 49.31(9.3)                                      | 52.06(10.2)                | 49.86(9.5)                   |
| Depression                             | 46.99(8.3)                            | 47.3(89.0)                  | 50.16(9.8)                        | 48.93(9.2)                               | 49.22(9.1)                   | 46.98(8.5)                            | 47.75(8.6)                                      | 50.91(9.4)                 | 47.87(8.9)                   |

\*mean(sd)

Table 3 provides more context to the range of observed health status scores by categorizing scores into degrees of severity: within normal limits, mild, moderate, and severe.[10,21,22] In this cohort, 24.9% of all

1  
2  
3 patients reported their physical functioning within normal limits; the majority of patients (75%) reported mild,  
4 moderate, or severe limitations in physical functioning. There is a similar trend for pain interference, where  
5 73% of patients reported mild, moderate, or severe limitations with pain interference. The majority of the cohort  
6 reported within normal limits for the ability to participate in social roles (63.5%), fatigue (68.0%), and sleep  
7 disturbance (66.0%). For the mental health domains (anxiety and depression), across the samples, most  
8 patients reported normal limits for anxiety (69.6%) and depression (76.8%). Few patients reported severe  
9 symptoms of anxiety (1.7%) and depression (1.1%).  
10  
11  
12  
13  
14  
15  
16  
17  
18  
19  
20  
21  
22  
23  
24  
25  
26  
27  
28  
29  
30  
31  
32  
33  
34  
35  
36  
37  
38  
39  
40  
41  
42  
43  
44  
45  
46  
47  
48  
49  
50  
51  
52  
53  
54  
55  
56  
57  
58  
59  
60

Table 3: PROMIS Severity Categories by Clinical Subspecialty

|                                               | Foot and ankle<br>(n=2208) | Hand<br>(n=1858) | Neurosurgery<br>(n=1044) | Orthopaedic<br>Oncology<br>(n=124) | Spine<br>(n=3028) | Sports medicine<br>(n=4197) | Total Joint<br>Arthroplasty<br>(n=2353) | Trauma<br>(n=98) | Total<br>(n=14,910) |
|-----------------------------------------------|----------------------------|------------------|--------------------------|------------------------------------|-------------------|-----------------------------|-----------------------------------------|------------------|---------------------|
| <b>Physical Health Domains</b>                |                            |                  |                          |                                    |                   |                             |                                         |                  |                     |
| <b>Physical function</b>                      |                            |                  |                          |                                    |                   |                             |                                         |                  |                     |
| Within Normal limits                          | 29.6%                      | 40.5%            | 16.2%                    | 32.3%                              | 15.7%             | 29.1%                       | 16.6%                                   | 11.3%            | 24.9%               |
| Mild                                          | 22.9%                      | 20.7%            | 13.1%                    | 11.3%                              | 15.0%             | 22.1%                       | 20.0%                                   | 8.3%             | 19.5%               |
| Moderate                                      | 30.7%                      | 26.4%            | 38.9%                    | 33.1%                              | 40.5%             | 33.3%                       | 40.2%                                   | 29.9%            | 35.0%               |
| Severe                                        | 16.7%                      | 12.5%            | 31.8%                    | 23.4%                              | 28.8%             | 15.4%                       | 23.2%                                   | 50.5%            | 20.6%               |
| <b>Ability to participate in social roles</b> |                            |                  |                          |                                    |                   |                             |                                         |                  |                     |
| Within Normal limits                          | 67.2%                      | 74.3%            | 42.2%                    | 51.6%                              | 52.8%             | 72.8%                       | 60.6%                                   | 44.6%            | 63.5%               |
| Mild                                          | 18.3%                      | 13.9%            | 23.4%                    | 24.2%                              | 21.3%             | 14.2%                       | 18.9%                                   | 15.4%            | 17.8%               |
| Moderate                                      | 11.5%                      | 9.6%             | 24.9%                    | 20.0%                              | 19.5%             | 10.3%                       | 16.1%                                   | 24.6%            | 14.4%               |
| Severe                                        | 2.9%                       | 2.2%             | 9.5%                     | 4.2%                               | 6.4%              | 2.7%                        | 4.4%                                    | 15.4%            | 4.3%                |
| <b>Pain interference</b>                      |                            |                  |                          |                                    |                   |                             |                                         |                  |                     |
| Within Normal limits                          | 33.8%                      | 43.7%            | 16.3%                    | 33.1%                              | 16.7%             | 29.8%                       | 20.3%                                   | 21.7%            | 27.0%               |
| Mild                                          | 23.6%                      | 24.3%            | 16.7%                    | 16.5%                              | 21.4%             | 28.4%                       | 24.3%                                   | 13.0%            | 24.1%               |
| Moderate                                      | 39.4%                      | 28.8%            | 59.7%                    | 46.3%                              | 55.8%             | 38.0%                       | 49.0%                                   | 55.4%            | 44.1%               |
| Severe                                        | 3.2%                       | 3.3%             | 7.4%                     | 4.1%                               | 6.2%              | 3.7%                        | 6.5%                                    | 9.8%             | 4.8%                |
| <b>Fatigue</b>                                |                            |                  |                          |                                    |                   |                             |                                         |                  |                     |
| Within Normal limits                          | 73.4%                      | 73.9%            | 50.7%                    | 63.2%                              | 57.2%             | 74.4%                       | 70.6%                                   | 55.2%            | 68.0%               |
| Mild                                          | 12.3%                      | 11.3%            | 17.7%                    | 13.7%                              | 17.1%             | 12.3%                       | 13.8%                                   | 17.9%            | 13.9%               |
| Moderate                                      | 12.0%                      | 12.2%            | 24.6%                    | 20.0%                              | 21.8%             | 11.0%                       | 13.2%                                   | 20.9%            | 15.1%               |
| Severe                                        | 2.3%                       | 2.7%             | 7.0%                     | 3.2%                               | 3.9%              | 2.3%                        | 2.4%                                    | 6.0%             | 3.1%                |
| <b>Sleep</b>                                  |                            |                  |                          |                                    |                   |                             |                                         |                  |                     |
| Within Normal limits                          | 74.3%                      | 71.5%            | 54.3%                    | 67.2%                              | 58.0%             | 69.0%                       | 64.8%                                   | 55.3%            | 66.0%               |



|                              |       |       |       |       |       |       |       |       |       |
|------------------------------|-------|-------|-------|-------|-------|-------|-------|-------|-------|
| Mild                         | 13.7% | 14.1% | 17.5% | 18.0% | 18.1% | 14.4% | 16.0% | 13.8% | 15.5% |
| Moderate                     | 10.5% | 11.7% | 22.3% | 11.5% | 19.3% | 13.7% | 16.1% | 23.4% | 15.1% |
| Severe                       | 1.6%  | 2.7%  | 5.9%  | 3.3%  | 4.7%  | 2.9%  | 3.0%  | 7.5%  | 3.3%  |
| <b>Mental Health Domains</b> |       |       |       |       |       |       |       |       |       |
| <b>Anxiety</b>               |       |       |       |       |       |       |       |       |       |
| Within Normal limits         | 74.6% | 71.6% | 59.7% | 55.8% | 62.0% | 73.4% | 72.5% | 60.6% | 69.6% |
| Mild                         | 14.0% | 14.8% | 16.2% | 22.1% | 17.2% | 14.7% | 15.2% | 16.7% | 15.4% |
| Moderate                     | 10.5% | 11.4% | 20.2% | 19.0% | 18.9% | 10.9% | 10.7% | 19.7% | 13.4% |
| Severe                       | 0.9%  | 2.1%  | 3.9%  | 3.2%  | 1.9%  | 1.1%  | 1.6%  | 3.0%  | 1.7%  |
| <b>Depression</b>            |       |       |       |       |       |       |       |       |       |
| Within Normal limits         | 80.7% | 78.3% | 66.5% | 71.9% | 71.5% | 79.9% | 78.6% | 65.6% | 76.8% |
| Mild                         | 12.1% | 12.0% | 15.9% | 14.9% | 14.9% | 12.2% | 12.5% | 20.0% | 13.1% |
| Moderate                     | 6.5%  | 8.2%  | 15.2% | 12.4% | 12.3% | 7.3%  | 8.0%  | 12.2% | 9.1%  |
| Severe                       | 0.6%  | 1.5%  | 2.5%  | 0.8%  | 1.4%  | 0.7%  | 1.0%  | 2.2%  | 1.1%  |

In **table 4**, we examine the correlation of PROMIS domains in the cohort. As expected, we found high correlations between depression and anxiety ( $r=0.76$ ) and pain interference and pain intensity ( $r=0.75$ ). Additionally, we found moderate correlations between commonly administered PROMIS domains in Orthopaedics - physical function and pain interference ( $r=-0.60$ ) and physical function and pain intensity ( $-0.52$ ). There was a low correlation found between anxiety and pain intensity ( $r=0.30$ ), anxiety, and pain interference ( $r=0.36$ ), anxiety, and physical function ( $r=-0.32$ ). Similar trends were found with depression where low correlations between depression and pain intensity ( $r=0.29$ ), depression, and pain interference ( $r=0.39$ ), depression, and physical function ( $r=-0.30$ ).

**Table 4: Correlation of PROMIS Domains**

|                | Participation | Anxiety | Depression | Fatigue | Pain Intensity | Pain Interference | Physical Function | Sleep Disturbance |
|----------------|---------------|---------|------------|---------|----------------|-------------------|-------------------|-------------------|
| Participation  | -             | -0.48   | -0.51      | -0.66   | -0.52          | -0.69             | 0.67              | -0.45             |
| Anxiety        | -0.48         | -       | 0.76       | 0.58    | 0.30           | 0.36              | -0.32             | 0.44              |
| Depression     | -0.51         | 0.76    | -          | 0.58    | 0.29           | 0.39              | -0.30             | 0.43              |
| Fatigue        | -0.66         | 0.58    | 0.58       | -       | 0.42           | 0.52              | -0.48             | 0.54              |
| Pain Intensity | -0.52         | 0.30    | 0.29       | 0.42    | -              | 0.75              | -0.52             | 0.39              |

|                   |       |       |       |       |       |       |       |       |
|-------------------|-------|-------|-------|-------|-------|-------|-------|-------|
| Pain Interference | -0.69 | 0.36  | 0.39  | 0.52  | 0.75  | -     | -0.60 | 0.45  |
| Physical Function | 0.67  | -0.32 | -0.30 | -0.48 | -0.52 | -0.60 | -     | -0.31 |
| Sleep Disturbance | -0.45 | 0.44  | 0.43  | 0.54  | 0.39  | 0.45  | -0.31 | -     |

\*all correlations were statistically significant  $P < 0.001$

## PROMIS Scores by Major Clinical Specialties

### Foot and Ankle

Patients consulting with a foot and ankle orthopedic specialist scored less than 0.5 SD from the mean for all domains except for pain interference, where patients reported a mean score of 57.2(8.6). When looking at the clinically interpretable categories for physical function, 30.7% of patients reported moderate limitations and 16.7% severe limitations. For pain interference, 39.4% reported moderate and limitations, and 3.2% reported severe limitations.

### Hand

Patients who consulted with a hand orthopedic specialist reported scores less than 0.5 SD from the mean for all domains except pain interference and physical function. Patients reported a mean score of 55.7(8.8) and 41.85(9.5), respectively. For physical function, 26.4% of patients reported moderate limitations, and 12.5% reported severe limitations.

### Neurosurgery and Spine

Patients either consulting with a neurosurgeon or a spine orthopedic specialist reported between 1- 1.5 standard deviations from the US mean for pain interference and physical functioning. Neurosurgery patients reported higher levels of pain interference (61.53(8.1)) compared to spine patients (57.23(9.7)) and also reported more limitations in physical functioning (35.0(9.0)) as compared to spine patients (38.35(10.5)). For physical function, a majority of neurosurgery patients reported moderate (38.9%) and severe (31.8%) limitations, and this was similar in spine patients (moderate- 40.5%, severe 28.8%). Pain interference, most neurosurgery (59.7%) and Spine patients (55.8%) reported moderate limitations, and a small percentage of neurosurgery (7.4%) and spine patients (6.2%) reported severe limitations.

### Sports Medicine

Patients seeking care from a sports medicine specialist reported less than 0.5 SD from the US mean in all domains except physical function (39.51(8.8)) and pain interference (58.0(7.6)) where their scores were between 0.5-1.0 SD from the US mean. 33.3% of patients reported moderate limitations in physical function, and 15.4% reported severe limitations. For pain interference, 38.0% of patients reported moderate limitations, and 3.7% reported severe limitations.

### Total Joint Arthroplasty

Patients consulting a Total Joint Arthroplasty Orthopaedic Surgeon reported less than 0.5 SD from the US mean in all domains except physical functioning (36.58(8.5)) and pain interference (60.21(8.4)). Most patients reported moderate limitations in physical functioning (40.2%) and pain interference (48.9%), and 23.2% reported severe limitations in physical function, and only a small percentage reported severe limitations for pain interference (6.5%).

We did not report on Trauma or Orthopaedic Oncology due to low sample sizes in each of these subspecialties.

## DISCUSSION

This study described approximately 15,000 orthopedic patients across eight different clinical subspecialties who completed the PROMIS measures associated with a new patient consultation to an orthopedic specialist at an academic medical center. We found across the Orthopaedic department that most patients reported within 0.5 SD from the US mean on all domains except pain interference and physical functioning. These findings are expected, where the primary drivers of seeking care for orthopedic issues are decreased physical functioning and increased interference with activities due to pain.[24],[25] When further examining the difference of PROMIS scores between the clinical subspecialties for the physical health domains, we found that patients seeking care from hand specialists reported less overall physical health impairments. However, we may in part attribute this to administering the generic physical function measure rather than the upper extremity physical function PROMIS measure, which is more specific to upper extremity conditions.[26] Patients seeking care from a Neurosurgery, Spine, or a Trauma specialist reported significant

1  
2  
3 physical health impairments. When examining the mental health domains, most patients across clinical  
4 subspecialties reported that their anxiety and depression symptoms were within normal limits; however,  
5 between 11.4%-- 24.1% reported moderate or severe anxiety and 7.1-17.6% reported moderate or severe  
6 depressive symptoms. Following a similar trend for physical health domains, patients seeking care from a  
7 Neurosurgery, Spine, or Trauma specialist reported the highest anxiety and depression symptoms. This  
8 relationship is consistent with literature supporting patients with spine conditions, and orthopedic trauma has  
9 higher anxiety levels than other orthopedic conditions.[27,28]  
10  
11  
12  
13  
14  
15  
16

17  
18 Our study has noted strengths. First, our study is novel in that we reported eight PROMIS domains  
19 across eight different orthopedic clinical subspecialties. The use of PROMIS measures in clinical practice and  
20 research has been increasing in prevalence in spine, total joint, sports medicine, upper extremity disorders,  
21 trauma, and lower extremity disorders.[29] However, this is the first study we are aware of to compare  
22 differences in these health domains across clinical subspecialties. These comparisons would not be possible if  
23 using region-specific measures common to orthopedic practice and research. By implementing PROMIS  
24 measures, we can draw inferences about differences in patient-reported health status across orthopedic  
25 populations that are typically not compared. Second, our study reported clinical interpretation of PROMIS  
26 scores addressing the reported barrier to PROMIS use uptake.[8,30] Providing the clinical interpretation is vital  
27 because often there is a disconnect between mean PROMIS scores(i.e., physical functioning score- 38.2)and  
28 how to interpret this information (moderate limitations in physical functioning).[30] Our study is not without  
29 limitations. First, this was a cross-sectional cohort analysis, so we did report PROMIS measures beyond  
30 baseline. Therefore, we cannot compare the change in PROMIS scores or downstream utilization of  
31 Orthopaedic procedures or rehabilitation services. Second, our findings may have limited generalizability. For  
32 example, the setting was a private hospital. It may not capture the broad diversity of non-white individuals in  
33 the area (79.3% of individuals reported being Caucasian). Our instruments were only available in English,  
34 limiting data collection on non-English speaking patients. Moreover, in some clinical subspecialties reported  
35 (i.e., trauma and orthopedic oncology), small sample sizes were limiting these findings' generalizability. Lastly,  
36 we did not compare upper extremity physical function PROMIS measure or legacy measures as part of this  
37  
38  
39  
40  
41  
42  
43  
44  
45  
46  
47  
48  
49  
50  
51  
52  
53  
54  
55  
56  
57  
58  
59  
60

1  
2  
3 study. However, the relationship between legacy measures in orthopedics and PROMIS measures is well  
4 documented in the literature. [31]

7 Our study's findings are consistent with other literature regarding orthopedic populations' physical and  
8 mental health status. [32] Our study found that the potential drivers for seeking care limitations in physical  
9 function and pain across all clinical subspecialties consistent with the literature.[33–35] In comparison to a  
10 study by Perruccio et al. (2013) using the SF-36 as the outcome measure to physical and mental health in  
11 patients seeking care for musculoskeletal disorders, we found similar results where patients with spine  
12 disorders reported the most impairments in the cohort. [32] Additionally, consistent with our results, they found  
13 hand upper extremity/hand patients were the healthiest, and total joint arthroplasty patients demonstrated low  
14 levels of physical functioning. Our study's unexpected finding low levels of sleep disturbance, fatigue, and  
15 depression reported across clinical subspecialties. Sleep disruption and pain frequently co-occur; both are  
16 uniquely linked with depressed mood [36–39] and various forms of functional disability [40–42]. Depression  
17 appears to play a substantial role in the sleep-pain linkage, particularly where the pain is severe. [43] However,  
18 in our study, we did not find this relationship between pain, physical function, sleep disturbance, and  
19 depression in the cohort, despite the research supporting these relationships. [43]

22 Reporting patients' health status consulting an Orthopaedic provider using a standard set of outcome  
23 measures across various clinical subspecialties has numerous clinical care and research implications.  
24 Understanding the health status and clinical examination measures may improve patient and provider  
25 communication during the clinical encounter [44] and be used as part of the prognostic evaluation. [45]  
26 Moreover, this study can provide a context for informing bundled care or value-based care models. Classifying  
27 heterogeneous orthopedic patients' baseline status on a standard metric could better inform the effectiveness  
28 and cost of treatment pathways.[46] Lastly, reporting PROMIS scores has allowed the direct comparison of  
29 eight meaningful constructs across orthopedic subspecialties. This comparison would not be possible with  
30 legacy measures, which is a noted strength of PROMIS measures. These comparisons allow unique insights to  
31 be made for orthopedic departments and align clinical and research data collection with value-based care  
32 initiatives outside of orthopedic departments. Clinicians and administrators can use this information to improve

1  
2  
3 the delivery and the efficiency of care, improve and inform referral practices, and inform subspecialty-specific  
4 education to improve patient outcomes from orthopedic care.  
5  
6  
7  
8  
9

10 **Acknowledgments:** We would like to acknowledge the Comprehensive Outcomes in Orthopaedics and  
11 Rehabilitation Data System (COORDS) group for supporting the infrastructure for data collection. We would  
12 also like to acknowledge Jennifer Gagnon for her contribution to data acquisition.  
13  
14  
15

16 **Competing Interests:** none declared  
17

18 **Funding:** his research received no specific grant from any funding agency in public, commercial or not-for-  
19 profit sectors  
20  
21

22 **Author Contributions:** Maggie Horn contributed to the work's conception, design of the study, data  
23 acquisition, and writing of the manuscript. Steven George contributed to the conception of the work, design of  
24 the manuscript's study, and writing. Emily Reinke contributed to the conception of the work, design of the  
25 study, data acquisition, and writing the manuscript. Xiaofang Yan and Sheng Luo contributed to the study's  
26 design and statistical analysis. All authors had final approval of the manuscript. Michael Bolognesi contributed  
27 to the design of the manuscript's study and writing.  
28  
29  
30  
31  
32  
33

34 **Data Availability:** Data are not available in accordance with protections provided by the HIPAA privacy  
35 information policy.  
36  
37  
38  
39  
40  
41  
42  
43  
44  
45  
46  
47  
48  
49  
50  
51  
52  
53  
54  
55  
56  
57  
58  
59  
60

## REFERENCES

- 1 Jones RS, Stukenborg GJ. Patient-Reported Outcomes Measurement Information System (PROMIS) Use in Surgical Care: A Scoping Study. *J Am Coll Surg* 2017;**224**:245–54.e1. doi:10.1016/j.jamcollsurg.2016.11.015
- 2 Nelson EC, Eftimovska E, Lind C, *et al.* Patient reported outcome measures in practice. *BMJ* 2015;**350**:g7818. doi:10.1136/bmj.g7818
- 3 Hung M, Stuart AR, Higgins TF, *et al.* Computerized Adaptive Testing Using the PROMIS Physical Function Item Bank Reduces Test Burden With Less Ceiling Effects Compared With the Short Musculoskeletal Function Assessment in Orthopaedic Trauma Patients. *Journal of Orthopaedic Trauma*. 2014;**28**:439–43. doi:10.1097/bot.0000000000000059
- 4 Sikorskii A, Victorson D, O'Connor P, *et al.* PROMIS and legacy measures compared in a supportive care intervention for breast cancer patients and caregivers: Experience from a randomized trial. *Psychooncology* 2018;**27**:2265–73. doi:10.1002/pon.4825
- 5 PROMIS. <https://www.healthmeasures.net/score-and-interpret/interpret-scores/promis> (accessed 9 Jul 2020).
- 6 Kortlever JTP, Leyton-Mange A, Keulen MHF, *et al.* PROMIS Physical Function Correlates with KOOS, JR in Patients with Knee Pain. *J Knee Surg* 2020;**33**:903–11. doi:10.1055/s-0039-1688780
- 7 Moore MLG, Kortlever JTP, Keulen MHF, *et al.* PROMIS PF correlates with HOOS, JR in patients with hip pain. *J Orthop* 2020;**21**:58–61. doi:10.1016/j.jor.2020.01.048
- 8 Brodke DJ, Saltzman CL, Brodke DS. PROMIS for Orthopaedic Outcomes Measurement. *J Am Acad Orthop Surg* 2016;**24**:744–9. doi:10.5435/JAAOS-D-15-00404
- 9 Jildeh TR, Lizzio VA, Meta F, *et al.* The Correlation Between PROMIS Pain Interference and VAS Pain in Ambulatory Orthopedic Patients. *Orthopedics* 2018;**41**:e813–9. doi:10.3928/01477447-20180912-06
- 10 Cella D, Riley W, Stone A, *et al.* The Patient-Reported Outcomes Measurement Information System (PROMIS) developed and tested its first wave of adult self-reported health outcome item banks: 2005–2008. *Journal of Clinical Epidemiology*. 2010;**63**:1179–94. doi:10.1016/j.jclinepi.2010.04.011
- 11 Wilson I, Bohm E, Lübbecke A, *et al.* Orthopaedic registries with patient-reported outcome measures. *EFORT Open Rev* 2019;**4**:357–67. doi:10.1302/2058-5241.4.180080
- 12 Bruce B, Fries J, Lingala B, *et al.* Development and assessment of floor and ceiling items for the PROMIS physical function item bank. *Arthritis Res Ther* 2013;**15**:R144. doi:10.1186/ar4327
- 13 Amtmann D, Cook KF, Jensen MP, *et al.* Development of a PROMIS item bank to measure pain interference. *Pain* 2010;**150**:173–82. doi:10.1016/j.pain.2010.04.025
- 14 Haefeli M, Elfering A. Pain assessment. *Eur Spine J* 2006;**15 Suppl 1**:S17–24. doi:10.1007/s00586-005-1044-x
- 15 Pilkonis PA, Yu L, Dodds NE, *et al.* Validation of the depression item bank from the Patient-Reported Outcomes Measurement Information System (PROMIS®) in a three-month observational .... *Journal of psychiatric* Published Online First:

2014. <https://www.sciencedirect.com/science/article/pii/S0022395614001484>
- 16 Pilkonis PA, Choi SW, Reise SP, *et al.* Item Banks for Measuring Emotional Distress From the Patient-Reported Outcomes Measurement Information System (PROMIS®): Depression, Anxiety, and Anger. *Assessment* 2011;**18**:263–83. doi:10.1177/1073191111411667
- 17 Yu L, Buysse DJ, Germain A, *et al.* Development of short forms from the PROMIS™ sleep disturbance and Sleep-Related Impairment item banks. *Behav Sleep Med* 2011;**10**:6–24. doi:10.1080/15402002.2012.636266
- 18 Lai J-S, Cella D, Choi S, *et al.* How item banks and their application can influence measurement practice in rehabilitation medicine: a PROMIS fatigue item bank example. *Arch Phys Med Rehabil* 2011;**92**:S20–7. doi:10.1016/j.apmr.2010.08.033
- 19 Hahn EA, PROMIS Cooperative Group, DeWalt DA, *et al.* New English and Spanish social health measures will facilitate evaluating health determinants. *Health Psychology*. 2014;**33**:490–9. doi:10.1037/hea0000055
- 20 Ripley BD. The R project in statistical computing. *MSOR Connections The newsletter of the LTSN Maths* Published Online First: 2001. <http://citeseerx.ist.psu.edu/viewdoc/download?doi=10.1.1.430.3979&rep=rep1&type=pdf>
- 21 Rothrock NE, Hays RD, Spritzer K, *et al.* Relative to the general US population, chronic diseases are associated with poorer health-related quality of life as measured by the Patient-Reported Outcomes Measurement Information System (PROMIS). *Journal of Clinical Epidemiology*. 2010;**63**:1195–204. doi:10.1016/j.jclinepi.2010.04.012
- 22 Score Cut Points. <https://www.healthmeasures.net/score-and-interpret/interpret-scores/promis/promis-score-cut-points> (accessed 27 Oct 2020).
- 23 Mukaka MM. A guide to appropriate use of Correlation coefficient in medical research. *Malawi Med J* 2012;**24**:69–71. doi:10.4314/mmj.v24i3.
- 24 Von Korff M, Scher AI, Helmick C, *et al.* United States National Pain Strategy for Population Research: Concepts, Definitions, and Pilot Data. *J Pain* 2016;**17**:1068–80. doi:10.1016/j.jpain.2016.06.009
- 25 St. Sauver JL, Warner DO, Yawn BP, *et al.* Why Patients Visit Their Doctors: Assessing the Most Prevalent Conditions in a Defined American Population. *Mayo Clin Proc* 2013;**88**:56–67. doi:10.1016/j.mayocp.2012.08.020
- 26 Makhni EC, Meadows M, Hamamoto JT, *et al.* Patient Reported Outcomes Measurement Information System (PROMIS) in the upper extremity: the future of outcomes reporting? *J Shoulder Elbow Surg* 2017;**26**:352–7. doi:10.1016/j.jse.2016.09.054
- 27 Beleckas CM, Prather H, Guattery J, *et al.* Anxiety in the orthopedic patient: using PROMIS to assess mental health. *Qual Life Res* 2018;**27**:2275–82. doi:10.1007/s11136-018-1867-7
- 28 McCrabb S, Baker AL, Attia J, *et al.* Comorbid tobacco and other substance use and symptoms of anxiety and depression among hospitalised orthopaedic trauma patients. *BMC Psychiatry* 2019;**19**:28. doi:10.1186/s12888-019-2021-y
- 29 Maggie E. Horn, Emily K. Reinke, Logan J. Couce, Bryce B. Reeve, Leila Ledbetter, Steven Z. George. Reporting and utilization of Patient-Reported Outcomes Measurement Information System? (PROMIS)



- measures in orthopedic research and practice: a systematic review. *J Orthop Surg Res* doi:10.1186/s13018-020-02068-9
- 30 O'Hara NN, Richards JT, Overmann A, *et al.* Is PROMIS the new standard for patient-reported outcomes measures in orthopaedic trauma research? *Injury* Published Online First: 25 October 2019. doi:10.1016/j.injury.2019.10.076
- 31 Cheung EC, Moore LK, Flores SE, *et al.* Correlation of PROMIS with Orthopaedic Patient-Reported Outcome Measures. *JBJS Rev* 2019;**7**:e9. doi:10.2106/JBJS.RVW.18.00190
- 32 Perruccio AV, Gandhi R, Rampersaud YR, *et al.* Heterogeneity in health status and the influence of patient characteristics across patients seeking musculoskeletal orthopaedic care - a cross-sectional study. *BMC Musculoskelet Disord* 2013;**14**:83. doi:10.1186/1471-2474-14-83
- 33 Perruccio AV, Davis AM, Hogg-Johnson S, *et al.* Importance of self-rated health and mental well-being in predicting health outcomes following total joint replacement surgery for osteoarthritis. *Arthritis Care Res* 2011;**63**:973–81. <https://onlinelibrary.wiley.com/doi/abs/10.1002/acr.20467>
- 34 Hopman WM, Towheed T, Anastassiades T, *et al.* Canadian normative data for the SF-36 health survey. *CMAJ* 2000;**163**:265–71. <https://www.cmaj.ca/content/163/3/265.short> (accessed 8 Nov 2020).
- 35 Raad M, Amin RM, El Abiad JM, *et al.* Preoperative Patient Functional Status Is an Independent Predictor of Outcomes After Primary Total Hip Arthroplasty. *Orthopedics* 2019;**42**:e326–30. doi:10.3928/01477447-20190321-01
- 36 Chen Q, Hayman LL, Shmerling RH, *et al.* Characteristics of Chronic Pain Associated with Sleep Difficulty in Older Adults: The Maintenance of Balance, Independent Living, Intellect, and Zest in the Elderly (MOBILIZE) Boston Study. *Journal of the American Geriatrics Society*. 2011;**59**:1385–92. doi:10.1111/j.1532-5415.2011.03544.x
- 37 McCurry SM, Von Korff M, Vitiello MV, *et al.* Frequency of comorbid insomnia, pain, and depression in older adults with osteoarthritis: predictors of enrollment in a randomized treatment trial. *J Psychosom Res* 2011;**71**:296–9. doi:10.1016/j.jpsychores.2011.05.012
- 38 Smith MT, Quartana PJ, Okonkwo RM, *et al.* Mechanisms by which sleep disturbance contributes to osteoarthritis pain: a conceptual model. *Curr Pain Headache Rep* 2009;**13**:447–54. doi:10.1007/s11916-009-0073-2
- 39 Cole JC, Dubois D, Kosinski M. Use of patient-reported sleep measures in clinical trials of pain treatment: a literature review and synthesis of current sleep measures and a conceptual model of sleep disturbance in pain. *Clinical Therapeutics*. 2007;**29**:2580–8. doi:10.1016/j.clinthera.2007.12.005
- 40 Goldman SE, Stone KL, Ancoli-Israel S, *et al.* Poor sleep is associated with poorer physical performance and greater functional limitations in older women. *Sleep* 2007;**30**:1317–24. doi:10.1093/sleep/30.10.1317
- 41 Guccione AA, Felson DT, Anderson JJ, *et al.* The effects of specific medical conditions on the functional limitations of elders in the Framingham Study. *Am J Public Health* 1994;**84**:351–8. doi:10.2105/ajph.84.3.351
- 42 McCracken LM, Iverson GL. Disrupted sleep patterns and daily functioning in patients with chronic pain. *Pain Res Manag* 2002;**7**:75–9. doi:10.1155/2002/579425
- 43 Finan PH, Goodin BR, Smith MT. The association of sleep and pain: an update and a path forward. *J Pain*

1  
2  
3 2013;**14**:1539–52. doi:10.1016/j.jpain.2013.08.007  
4

5 44 Olde Rikkert MGM, van der Wees PJ, Schoon Y, *et al.* Using Patient Reported Outcomes Measures to  
6 Promote Integrated Care. *Int J Integr Care* 2018;**18**:8. doi:10.5334/ijic.3961  
7

8 45 Wees PJVANDER, Van Der Wees PJ, Nijhuis-Van Der MW, *et al.* Integrating the Use of Patient-Reported  
9 Outcomes for Both Clinical Practice and Performance Measurement: Views of Experts from 3 Countries.  
10 *Milbank Quarterly*. 2014;**92**:754–75. doi:10.1111/1468-0009.12091  
11

12 46 Porter ME, Others. What is value in health care. *N Engl J Med* 2010;**363**:2477–  
13 81.[http://www.academia.edu/download/30781672/2011-1\\_Porter\\_What-is-value-in-health-care\\_Appendix-](http://www.academia.edu/download/30781672/2011-1_Porter_What-is-value-in-health-care_Appendix-1.pdf)  
14 [1.pdf](http://www.academia.edu/download/30781672/2011-1_Porter_What-is-value-in-health-care_Appendix-1.pdf)  
15  
16  
17  
18  
19  
20  
21  
22  
23  
24  
25  
26  
27  
28  
29  
30  
31  
32  
33  
34  
35  
36  
37  
38  
39  
40  
41  
42  
43  
44  
45  
46  
47  
48  
49  
50  
51  
52  
53  
54  
55  
56  
57  
58  
59  
60

**STROBE 2007 (v4) Statement—Checklist of items that should be included in reports of cohort studies**

| Section/Topic                | Item # | Recommendation                                                                                                                                                                       | Reported on page # |
|------------------------------|--------|--------------------------------------------------------------------------------------------------------------------------------------------------------------------------------------|--------------------|
| <b>Title and abstract</b>    | 1      | (a) Indicate the study’s design with a commonly used term in the title or the abstract                                                                                               | 1                  |
|                              |        | (b) Provide in the abstract an informative and balanced summary of what was done and what was found                                                                                  | 2                  |
| <b>Introduction</b>          |        |                                                                                                                                                                                      |                    |
| Background/rationale         | 2      | Explain the scientific background and rationale for the investigation being reported                                                                                                 | 4                  |
| Objectives                   | 3      | State specific objectives, including any prespecified hypotheses                                                                                                                     | 4                  |
| <b>Methods</b>               |        |                                                                                                                                                                                      |                    |
| Study design                 | 4      | Present key elements of study design early in the paper                                                                                                                              | 5-6                |
| Setting                      | 5      | Describe the setting, locations, and relevant dates, including periods of recruitment, exposure, follow-up, and data collection                                                      | 5-6                |
| Participants                 | 6      | (a) Give the eligibility criteria, and the sources and methods of selection of participants. Describe methods of follow-up                                                           | 5-6                |
|                              |        | (b) For matched studies, give matching criteria and number of exposed and unexposed                                                                                                  | n/a                |
| Variables                    | 7      | Clearly define all outcomes, exposures, predictors, potential confounders, and effect modifiers. Give diagnostic criteria, if applicable                                             | 5-7                |
| Data sources/<br>measurement | 8*     | For each variable of interest, give sources of data and details of methods of assessment (measurement). Describe comparability of assessment methods if there is more than one group | 5-7                |
| Bias                         | 9      | Describe any efforts to address potential sources of bias                                                                                                                            | 5                  |
| Study size                   | 10     | Explain how the study size was arrived at                                                                                                                                            | 5                  |
| Quantitative variables       | 11     | Explain how quantitative variables were handled in the analyses. If applicable, describe which groupings were chosen and why                                                         | 5-7                |
| Statistical methods          | 12     | (a) Describe all statistical methods, including those used to control for confounding                                                                                                | 7                  |
|                              |        | (b) Describe any methods used to examine subgroups and interactions                                                                                                                  | 7                  |
|                              |        | (c) Explain how missing data were addressed                                                                                                                                          | 7                  |
|                              |        | (d) If applicable, explain how loss to follow-up was addressed                                                                                                                       | 7                  |
|                              |        | (e) Describe any sensitivity analyses                                                                                                                                                | 7                  |
| <b>Results</b>               |        |                                                                                                                                                                                      |                    |

|                          |     |                                                                                                                                                                                                              |        |
|--------------------------|-----|--------------------------------------------------------------------------------------------------------------------------------------------------------------------------------------------------------------|--------|
| Participants             | 13* | (a) Report numbers of individuals at each stage of study—eg numbers potentially eligible, examined for eligibility, confirmed eligible, included in the study, completing follow-up, and analysed            | 8      |
|                          |     | (b) Give reasons for non-participation at each stage                                                                                                                                                         | n/a    |
|                          |     | (c) Consider use of a flow diagram                                                                                                                                                                           | n/a    |
| Descriptive data         | 14* | (a) Give characteristics of study participants (eg demographic, clinical, social) and information on exposures and potential confounders                                                                     | 8      |
|                          |     | (b) Indicate number of participants with missing data for each variable of interest                                                                                                                          | tables |
|                          |     | (c) Summarise follow-up time (eg, average and total amount)                                                                                                                                                  | n/a    |
| Outcome data             | 15* | Report numbers of outcome events or summary measures over time                                                                                                                                               | 8      |
| Main results             | 16  | (a) Give unadjusted estimates and, if applicable, confounder-adjusted estimates and their precision (eg, 95% confidence interval). Make clear which confounders were adjusted for and why they were included | 8-10   |
|                          |     | (b) Report category boundaries when continuous variables were categorized                                                                                                                                    | n/a    |
|                          |     | (c) If relevant, consider translating estimates of relative risk into absolute risk for a meaningful time period                                                                                             | n/a    |
| Other analyses           | 17  | Report other analyses done—eg analyses of subgroups and interactions, and sensitivity analyses                                                                                                               | n/a    |
| <b>Discussion</b>        |     |                                                                                                                                                                                                              |        |
| Key results              | 18  | Summarise key results with reference to study objectives                                                                                                                                                     | 15     |
| <b>Limitations</b>       |     |                                                                                                                                                                                                              |        |
| Interpretation           | 20  | Give a cautious overall interpretation of results considering objectives, limitations, multiplicity of analyses, results from similar studies, and other relevant evidence                                   | 16     |
| Generalisability         | 21  | Discuss the generalisability (external validity) of the study results                                                                                                                                        | 16     |
| <b>Other information</b> |     |                                                                                                                                                                                                              |        |
| Funding                  | 22  | Give the source of funding and the role of the funders for the present study and, if applicable, for the original study on which the present article is based                                                | 17     |

\*Give information separately for cases and controls in case-control studies and, if applicable, for exposed and unexposed groups in cohort and cross-sectional studies.

**Note:** An Explanation and Elaboration article discusses each checklist item and gives methodological background and published examples of transparent reporting. The STROBE checklist is best used in conjunction with this article (freely available on the Web sites of PLoS Medicine at <http://www.plosmedicine.org/>, Annals of Internal Medicine at <http://www.annals.org/>, and Epidemiology at <http://www.epidem.com/>). Information on the STROBE Initiative is available at [www.strobe-statement.org](http://www.strobe-statement.org).

# BMJ Open

## Use of Patient-Reported Outcome Measurement Information System® (PROMIS®) measures to characterize health status for patients seeking care from an orthopedic provider: A retrospective cohort study

|                                 |                                                                                                                                                                                                                                                                                                                                                                               |
|---------------------------------|-------------------------------------------------------------------------------------------------------------------------------------------------------------------------------------------------------------------------------------------------------------------------------------------------------------------------------------------------------------------------------|
| Journal:                        | <i>BMJ Open</i>                                                                                                                                                                                                                                                                                                                                                               |
| Manuscript ID                   | bmjopen-2020-047156.R1                                                                                                                                                                                                                                                                                                                                                        |
| Article Type:                   | Original research                                                                                                                                                                                                                                                                                                                                                             |
| Date Submitted by the Author:   | 03-Apr-2021                                                                                                                                                                                                                                                                                                                                                                   |
| Complete List of Authors:       | Horn, Maggie; Duke University School of Medicine, Reinke, Emily; Duke University School of Medicine Yan, Xiaofang; Duke Clinical Research Institute Luo, Sheng; Duke University, Bolognesi, Michael; Duke University, Reeve, Bryce B.; University of North Carolina at Chapel Hill Gillings School of Global Public Health, George, Steven; Duke Clinical Research Institute, |
| <b>Primary Subject Heading</b>: | Health services research                                                                                                                                                                                                                                                                                                                                                      |
| Secondary Subject Heading:      | Patient-centred medicine                                                                                                                                                                                                                                                                                                                                                      |
| Keywords:                       | Musculoskeletal disorders < ORTHOPAEDIC & TRAUMA SURGERY, Foot & ankle < ORTHOPAEDIC & TRAUMA SURGERY, Knee < ORTHOPAEDIC & TRAUMA SURGERY, Spine < ORTHOPAEDIC & TRAUMA SURGERY                                                                                                                                                                                              |
|                                 |                                                                                                                                                                                                                                                                                                                                                                               |

SCHOLARONE™  
Manuscripts



I, the Submitting Author has the right to grant and does grant on behalf of all authors of the Work (as defined in the below author licence), an exclusive licence and/or a non-exclusive licence for contributions from authors who are: i) UK Crown employees; ii) where BMJ has agreed a CC-BY licence shall apply, and/or iii) in accordance with the terms applicable for US Federal Government officers or employees acting as part of their official duties; on a worldwide, perpetual, irrevocable, royalty-free basis to BMJ Publishing Group Ltd ("BMJ") its licensees and where the relevant Journal is co-owned by BMJ to the co-owners of the Journal, to publish the Work in this journal and any other BMJ products and to exploit all rights, as set out in our [licence](#).

The Submitting Author accepts and understands that any supply made under these terms is made by BMJ to the Submitting Author unless you are acting as an employee on behalf of your employer or a postgraduate student of an affiliated institution which is paying any applicable article publishing charge ("APC") for Open Access articles. Where the Submitting Author wishes to make the Work available on an Open Access basis (and intends to pay the relevant APC), the terms of reuse of such Open Access shall be governed by a Creative Commons licence – details of these licences and which [Creative Commons](#) licence will apply to this Work are set out in our licence referred to above.

Other than as permitted in any relevant BMJ Author's Self Archiving Policies, I confirm this Work has not been accepted for publication elsewhere, is not being considered for publication elsewhere and does not duplicate material already published. I confirm all authors consent to publication of this Work and authorise the granting of this licence.

1  
2  
3 Title: Use of Patient-Reported Outcome Measurement Information System® (PROMIS®) measures to  
4  
5  
6 characterize health status for patients seeking care from an orthopedic provider: A retrospective cohort study  
7  
8  
9

10 Corresponding Author: Maggie E Horn DPT, MPH, PhD<sup>1,2</sup>

11  
12 Duke University, Box 10042, Durham, NC 27710, 919-684-1365, [maggie.horn@duke.edu](mailto:maggie.horn@duke.edu)

13  
14 Emily K. Reinke, PhD<sup>1</sup>

15  
16 Xiaofang Yang, PhD<sup>3</sup>

17  
18 Sheng Luo, PhD<sup>2,3</sup>

19  
20 Michael P Bolognesi, MD<sup>1</sup>

21  
22 Bryce B. Reeve, PhD<sup>2,3</sup>

23  
24 Steven Z George PT, PhD<sup>1,3</sup>

25  
26  
27 <sup>1</sup>Duke University, Department of Orthopaedic Surgery, Division of Physical Therapy, Durham, USA

28  
29 <sup>2</sup>Duke University, Department of Population Health Sciences, Durham, USA

30  
31 <sup>3</sup>Duke University, Duke Clinical Research Institute, Durham, USA

32  
33  
34  
35  
36 **Word count:** Abstract, 288; Body, 3514

## ABSTRACT

**Objectives:** Characterize the health status of patients newly consulting an orthopedic specialist across eight clinical subspecialties.

**Design:** Retrospective cohort

**Setting:** 18 orthopedic clinics, including eight subspecialties (14 ambulatory and four hospital-based) within an academic health system.

**Participants:** 14,910 patients consulting an orthopaedic specialist for a new patient consultation who completed baseline Patient-Reported Outcome Measurement Information System (PROMIS) measures associated with their appointment from November 17 2017 - May 13 2019. Patients were  $55.72 \pm 5.8$  years old, 61.3% female and 79.3% Caucasian, and were 13.4% Black or African American. Patients who did not complete PROMIS measures or canceled their appointment were excluded from the study.

**Primary Outcome:** PROMIS domains of physical function, pain interference, pain intensity, depression, anxiety, fatigue, sleep disturbance, and the ability to participate in social roles.

**Results:** Mean PROMIS scores for physical function was ( $38.1 \pm 9.2$ ), pain interference ( $58.9 \pm 8.1$ ), pain intensity ( $4.6 \pm 2.5$ ), depression ( $47.9 \pm 8.9$ ), anxiety ( $49.9 \pm 9.5$ ), fatigue ( $50.5 \pm 10.3$ ), sleep disturbance ( $51.1 \pm 9.8$ ), and ability to participate in social roles ( $49.1 \pm 10.3$ ). Across the clinical subspecialties, Neurosurgery, Spine, and Trauma patients were most profoundly affected across almost all domains, and patients consulting with a Hand specialist reported the least limitations or symptoms across domains. There was a moderate, negative correlation between pain interference and physical functioning ( $r = -0.59$ ) and low correlations



1  
2  
3 between pain interference with anxiety ( $r=0.36$ ), depression ( $r=0.39$ ) as well as physical function and anxiety  
4  
5 ( $r=-0.32$ ) and depression ( $r=-0.30$ ) and sleep ( $r=-0.31$ ).  
6

7  
8 **Conclusions:** We directly compared clinically meaningful PROMIS domains across eight orthopedic  
9  
10 subspecialties, which would not be possible with legacy measures alone. These results support PROMIS's  
11  
12 utility as a common metric to assess and compare patient health status across multiple orthopedic  
13  
14 subspecialties.  
15

## 16 17 18 **ARTICLE SUMMARY**

### 19 20 **Strengths and Limitations of this Study**

- 21  
22 • This study demonstrated the direct comparison of health status using PROMIS measures across eight  
23  
24 orthopedic clinical subspecialties, which was previously a challenge using legacy outcome measures.  
25
- 26  
27 • This study reported the association of eight clinically relevant PROMIS domains (six physical health  
28  
29 and two mental health domains) within an orthopedic cohort.
- 30  
31 • We evaluated PROMIS measures at baseline only as part of routine clinical assessment associated  
32  
33 with a new patient consultation with an orthopaedic specialist; no follow up data was analyzed in the  
34  
35 context of downstream healthcare utilization.
- 36  
37 • The findings' generalizability is limited by data collected within a private health system setting that may  
38  
39 not reflect other health systems' characteristics.  
40  
41  
42

43  
44 **Key Words:** Patient-reported outcome measures, orthopedics, health status, physical function, pain  
45  
46  
47  
48  
49  
50  
51  
52  
53  
54  
55  
56  
57  
58  
59  
60

## INTRODUCTION

To determine if a patient has achieved treatment success, it is insufficient to evaluate treatment results solely on medical history, physical findings, laboratory tests, or imaging findings alone.[1] While these are essential clinical indicators, they may not reflect what is most important to a patient. Patient-reported outcome measures (PROMs) are additional indicators that come directly from the patient. PROMs may address more important patient-centered outcomes about a patient's health status's physical, mental, and social aspects. Change in health status can be one of the measures of "success" from a patient's perspective after an orthopedic procedure.[2] PROMs are increasingly being used as part of the clinical encounter to guide treatment decisions and determine intervention effectiveness. [3]

"Legacy" patient-reported outcome measures (PROs) have been used for decades; however, they have many limitations.[4] To overcome the limitations of legacy measures the NIH developed a universally accepted set of PROMs. The NIH's Patient-Reported Outcomes Measurement Information System® (PROMIS®) covers a broad range of relevant domains and has strong evidence for its validity and reliability in a broad range of populations.[5–8] In orthopedics, the use of PROMIS measures has distinct advantages because it can be used across many clinical subspecialties as a common outcome metric. [8–10] This has the opportunity to allow for the evaluation of the efficacy of different interventions and inform quality improvement initiatives.[11]

Recently, there has been an increase in the adoption of PROMIS measures as the standard outcome measurement system in Orthopaedics to assess health status in orthopedic patients.[8] However, what is unknown about the use of PROMIS measures in orthopedics is how these measures differ across patients seeking care from different orthopedic clinical subspecialties. Moreover, there is limited data regarding the burden of disease in patients presenting to orthopedic clinics for initial care. Therefore, there are two goals of this study. First, we will characterize the health status of a cohort of patients completing PROMIS measures as part of the clinical encounter by comparing the physical health (6 domains) and mental health (2 domains) across eight different clinical subspecialty areas in a large academic medical center. Second, we will examine the correlation between the PROMIS domains in this cohort.

## METHODS

### Study Setting and Participants

Patients consulting an Orthopaedic specialist (surgeon or advanced practice provider- nurse practitioner or physician assistant) for a new patient consultation from November 17, 2017 - May 13, 2019 were considered. In this study, patients sought care within the Department of Orthopaedic surgery at a large academic, private medical center in Durham, NC. Inclusion criteria for the study were patients who completed assigned PROMIS measures associated with the visit type of new patient appointment. We excluded patients from the study who 1) were under 18 years of age at time of appointment, 2) completed assigned PROMIS measures but canceled or did not attend their scheduled appointments 3) who attended a visit with a provider that was not classified as an orthopaedic specialist or a provider that did not have a provider speciality designation within the EHR. The department includes 18 adult clinics (14 ambulatory and four hospital-based clinics). See Figure 1 for study eligibility. The department consists of eight subspecialties (Joint Reconstruction, Spine, Neurosurgery, Sports Medicine, Trauma, Orthopaedic Oncology, Foot and Ankle, and Hand) with over 100 Orthopaedic specialists. We extracted all data for this study directly from the electronic health record (EHR).

### Standardized Collection of PROMIS Measures

In December of 2017, the orthopedics department implemented a standardized collection of PROMIS measures across 18 clinics and eight clinical subspecialties. The administration of PROMIS measures was linked to new patient appointments and collected and scored passively within the EHR (Epic Systems) as part of the standard of care. Therefore, informed consent was not required for the completion of the PROMIS measures. However, we obtained IRB approval from Duke University for data extraction and analysis of the collected data for this study (Pro00091740)

From November 2017- May 2019, we collected the short-form version of the following 8 PROMIS domains: physical function (7 items), pain interference (8 items), pain intensity (1 item), depression (8 items), anxiety (8 items), fatigue (8 items), sleep disturbance (8 items) and ability to participate in social roles (8 items). On December 20, 2018 our health system transitioned to administering the computer adaptive testing

(CAT) version of PROMIS domains instead of short form as the (CAT) instruments were then available within our EHR. As part of the transition from short form to CAT, we reduced the set of PROMIS domains collected to physical function, pain interference, depression, and sleep disturbance. This change was done in response to feedback from clinicians regarding respondent burden with eight domains and perceived clinical utility of information gained. Studies to date suggest CATs and SFs will produce very similar mean scores for a given sample and demonstrate similar accuracy range with SFs are greater than 4 items such as in this study. [12–14] Therefore we combined these scores with the respective PROMIS short form scores for the analysis.

The PROMIS Physical Function domain is a patient's self-reported capability (rather than actual performance) of physical activities. The physical function domain includes the functioning of one's upper extremities (dexterity), lower extremities (walking or mobility), and central regions (neck, back), as well as instrumental activities of daily living, such as running errands.[15] PROMIS Pain Interference measures the consequences of pain on relevant aspects of one's life. The pain interference domain includes the extent to which pain hinders engagement with social, cognitive, emotional, physical, and recreational activities.[16] PROMIS pain intensity consists of one question, "How would you rate your pain on average? (0-10, 0=No pain 10=Worst imaginable)".[17] PROMIS emotional distress domains included depression and anxiety. Depression measures negative mood (sadness, guilt), views of self (self-criticism, worthlessness), and social cognition (loneliness, interpersonal alienation), as well as decreased positive affect and engagement (loss of interest, meaning, and purpose).[18] Anxiety domain measures fear (fearfulness, panic), anxious misery (worry, dread), hyperarousal (tension, nervousness, restlessness), and somatic symptoms related to arousal (racing heart, dizziness). [19] The PROMIS Sleep Disturbance Perceptions measure sleep quality, sleep depth, and restoration associated with sleep.[20] The PROMIS fatigue domain measures a range of symptoms, from mild subjective feelings of tiredness to an overwhelming, debilitating, and sustained sense of exhaustion that likely decreases one's ability to execute daily activities and function normally in a family or social roles.[21] The PROMIS Ability to Participate in Social Roles and Activities measures one's perceived ability to perform one's usual social roles and activities.[22,23]

1  
2  
3  
4 Each PROMIS domain is scored separately on a T-score metric, where 50 is the mean and 10 is the  
5  
6 standard deviation of the calibration population. For all PROMIS domains (except sleep disturbance) included  
7  
8 in this study, the calibration population is the US general population. A higher score on a domain reflects more  
9  
10 of the measured concept (e.g., more Fatigue, more Physical Function). For example, a physical function score  
11  
12 of 60 indicates the sample's functioning is one standard deviation better than the average US general  
13  
14 population and lower score is less of the measured concept.[5] To increase the interpretability of findings,  
15  
16 PROMIS scores can then be categorized into the categories of "Within Normal Limits" indicating less than a  
17  
18 0.5 SD from the mean; "Mild" indicating a score 0.5 SD from mean; "Moderate" indicating 1.0 SD from the  
19  
20 mean; and "Severe" s indicating 2.0 standard deviations from the mean. These categories were developed by  
21  
22 evaluating the percentage of participants from large scale calibration testing that would then fit into each  
23  
24 category.[10,24]  
25  
26

### 130 **Patient Demographics**

27  
28  
29  
30 Patient demographics recorded included patient age at the appointment, sex (male or female), race  
31  
32 (American Indian or Alaskan Native, Asian, Black or African American, Caucasian/White, Native Hawaiian or  
33  
34 Other Pacific Islander, Not Reported/Declined, Other and two or more races), ethnicity (Hispanic, Not  
35  
36 Hispanic/Latino, Not Reported/Declined), marital status (Divorced, Legally Separated, Life Partner, Married,  
37  
38 Single, unknown, widowed), geographical delineation (urban or rural) and primary and secondary insurance  
39  
40 type (Medicare, Medicaid, workers compensation, private).  
41  
42

### 137 **Healthcare Process Variables**

43  
44  
45  
46 In this sample, we collected information related to the new patient consultation, including; visit date,  
47  
48 clinic location and type (ambulatory vs. hospital-based), provider type (orthopedic physician or advanced  
49  
50 practice provider-nurse practitioner or physician assistant), and provider specialty (Joint Reconstruction, Spine,  
51  
52 Neurosurgery, Sports Medicine, Trauma, Orthopaedic Oncology, Foot and Ankle, and Hand).  
53  
54

### 142 **Data Analysis**

1  
2  
3 We performed data analysis using R Statistical Software version R 4.0.2.[25]  
4  
5

6 This study's primary purpose was to characterize the health status of patients seeking care from eight  
7  
8 orthopedic subspecialties in the Department of Orthopaedic Surgery. We calculated descriptive statistics to  
9  
10 characterize the cohort. Means and standard deviations were reported for continuous variables, and  
11  
12 percentages were reported for categorical variables. Cohort characteristics were compared across clinical  
13  
14 subspecialties using chi-square analysis for categorical variables and 1-way analyses of variance for  
15  
16 continuous variables. We conducted ordinary least squares (OLS) linear regression and reported the mean  
17  
18 and 95% CI standard deviation for PROMIS domain scores across each specialty and for the entire cohort. We  
19  
20 included the variables of age, sex (male, female), race (collapsed into caucasian/white, black/african american,  
21  
22 and other), ethnicity (collapsed into non-hispanic, hispanic and not reported) and instrument type (short form or  
23  
24 CAT). These variables were included to control for the effects of differences in demographic factors and  
25  
26 questionnaire type across specialities when comparing mean PROMIS scores. We then calculated the  
27  
28 percentage of patients in the total cohort and each clinical subspecialty by severity categories for each  
29  
30 PROMIS domain: within normal limits, mild, moderate, and severe.[10,24,26] Lastly, we performed Pearson  
31  
32 correlation analyses to determine the association of the 8 PROMIS domains in the cohort. We defined the  
33  
34 magnitude of correlation as follows: low correlation - 0.10-0.39, moderate correlation - 0.40-0.69, high  
35  
36 correlation - 0.70- 0.89 and very high correlation - 0.90-1.00.[27]  
37  
38  
39

## 40 **Patient and Public Involvement**

41  
42

43 There was no involvement from patients or members of the public in the design, or conduct, or reporting, or  
44  
45 dissemination plans of this study.  
46  
47

## 48 **RESULTS**

49  
50

### 51 **Cohort Demographics**

52

53 Our study included 14,910 patients who consulted an Orthopaedic specialist for a new patient  
54  
55 consultation and completed baseline PROMIS measures. Of the entire sample, 61.3% (n=9,137) were female  
56  
57  
58  
59  
60

with a mean age of 55.72(15.8). Most of the sample reported being Caucasian (79.3% (n=11,831)) and 13.4% (n=2,001) were Black or African American. Our sample's self-reported ethnicity was 93.7% (n=13976) Not Hispanic/Latino and 1.9% (n=285) Hispanic. The majority of patients in the sample were married (64.1%, n=9,553). The geographic dispersion of the sample included 83.8% (n=12,488) residing in urban areas and 8.6% (n=1,276) residing in rural areas in North Carolina. The primary insurance of the sample was predominantly private (90.3%, n=13,465) followed by Medicare (7.3%, n=1,088) and Medicaid (2.1%, n=311).

The highest volume of patients in the sample sought care from a sports medicine provider (28.1%, n=4,197) or a spine provider (20.3%, n=3,028), followed by total joint (15.8%, n=2,353), foot and ankle (14.8%, n=2,208) and hand 12.5%, n=1,858). Orthopedic oncology, neurosurgery, and trauma had fewer than 10% of the total volume of patients in the sample. See **table 1**.

**Table 1. Sample Characteristics by Clinical Specialty**

| Provider specialty                        | Foot and ankle (n=2208) | Hand (n=1858) | Neurosurgery (n=1044) | Orthopaedic Oncology (n=124) | Spine (n=3028) | Sports medicine (n=4197) | Total Joint Arthroplasty (n=2353) | Trauma (n=98) | Total (n=14,910) | P value |
|-------------------------------------------|-------------------------|---------------|-----------------------|------------------------------|----------------|--------------------------|-----------------------------------|---------------|------------------|---------|
| Age                                       | 56.72(15.2)             | 54.63(15.9)   | 56.11(15.3)           | 55.18(15.5)                  | 57.2(15.3)     | 52.68(16.3)              | 59(14.9)                          | 56.18(19.9)   | 55.72(15.8)      | <<0.001 |
| Gender                                    |                         |               |                       |                              |                |                          |                                   |               |                  |         |
| Female                                    | 64.1%(1416)             | 61.3%(1138)   | 61.2%(639)            | 51.6%(64)                    | 60.0%(1818)    | 60.3%(2532)              | 62.39%(1468)                      | 63.3%(62)     | 61.3%(9137)      | 0.015   |
| Male                                      | 35.9%(792)              | 38.8(720)     | 38.8%(405)            | 48.4%(60)                    | 40.0%(1210)    | 39.7%(1665)              | 37.61%(885)                       | 36.7%(36)     | 38.7%(5773)      |         |
| Race                                      |                         |               |                       |                              |                |                          |                                   |               |                  |         |
| 2 or more races                           | 1.2%(26)                | 1.7%(31)      | 0.9%(9)               | 0%(0)                        | 1.4%(42)       | 1.3%(55)                 | 1.0%(24)                          | 3.1%(3)       | 1.3%(190)        | 0.01    |
| American Indian or Alaskan Native         | 0.2%(4)                 | 0.3%(6)       | 0.7%(7)               | 0.8%(1)                      | 0.4%(11)       | 0.3%(14)                 | 0.2%(4)                           | 1.0%(1)       | 0.3%(48)         |         |
| Asian                                     | 1.9%(42)                | 2.1%(54)      | 2.0%(21)              | 2.4%(3)                      | 2.2%(65)       | 2.8%(118)                | 1.3%(31)                          | 1.0%(1)       | 2.2%(335)        |         |
| Black or African American                 | 12.6%(278)              | 14.9%(278)    | 13.1%(137)            | 14.5%(18)                    | 12.6%(380)     | 13.4%(564)               | 14.2%(333)                        | 13.3%(13)     | 13.4%(2001)      |         |
| Caucasian/White                           | 80.6%(1780)             | 77.6%(1441)   | 80.9%(845)            | 79.0%(98)                    | 80.5%(2438)    | 78.0%(3274)              | 79.9%(1879)                       | 77.6%(76)     | 79.3%(11831)     |         |
| Native Hawaiian or Other Pacific Islander | 0.1%(1)                 | 0.1%(2)       | 0.1%(1)               | 0%(0)                        | 0.1%(2)        | 0.1%(4)                  | 0.1%(2)                           | 0%(0)         | 0.1%(12)         |         |

|                            |             |             |            |            |             |             |             |           |              |         |
|----------------------------|-------------|-------------|------------|------------|-------------|-------------|-------------|-----------|--------------|---------|
| Not Reported/ Declined     | 2.7%(60)    | 2.037       | 1.5%(16)   | 2.4%(3)    | 2.3%(68)    | 3.2%(132)   | 2.6%(60)    | 1.0%(1)   | 2.5%(377)    |         |
| Other                      | 0.8%(17)    | 0.5(9)      | 0.7%(8)    | 0.8%(1)    | 0.7%(22)    | 0.9%(36)    | 0.9%(20)    | 3.1%(3)   | 0.8%(116)    |         |
| <b>Ethnicity</b>           |             |             |            |            |             |             |             |           |              |         |
| Hispanic                   | 1.7%(37)    | 2.4%(45)    | 2.2%(23)   | 0.8%(1)    | 1.9%(57)    | 2.0%(85)    | 1.4%(32)    | 5.1%(5)   | 1.9%(285)    | 0.013   |
| Not Hispanic/Latino        | 94.4%(2085) | 93.3%(1733) | 94.8%(990) | 92.7%(115) | 94.0%(2846) | 92.9%(3898) | 94.3%(2218) | 92.9%(91) | 93.7%(13976) |         |
| Not Reported/ Declined     | 3.9%(86)    | 4.3%(80)    | 3.0%(31)   | 6.5%(8)    | 4.1%(125)   | 5.1%(214)   | 4.4%(103)   | 2.0%(2)   | 4.4%(649)    |         |
| <b>Marital Status</b>      |             |             |            |            |             |             |             |           |              |         |
| Divorced                   | 6.2%(137)   | 8.0%(149)   | 7.9%(82)   | 5.7%(7)    | 8.3%(251)   | 6.5%(273)   | 8.0%(187)   | 15.3%(15) | 7.4%(1101)   | <<0.001 |
| Legally Separated          | 0.9%(20)    | 1.1%(21)    | 1.0%(10)   | 0.8%(1)    | 1.1%(32)    | 1.1%(47)    | 0.4%(9)     | 1.0%(1)   | 0.9%(141)    |         |
| Life Partner               | 0.8%(17)    | 0.6%(11)    | 0.5%(5)    | 0%(0)      | 0.3%(10)    | 0.5%(19)    | 0.3%(6)     | 1.0%(1)   | 0.5%(69)     |         |
| Married                    | 65.4%(1445) | 61.9%(1150) | 66.6%(695) | 71.8%(89)  | 66.1%(2002) | 61.3%(2572) | 66.0%(1552) | 49.0%(48) | 64.1%(9553)  |         |
| Single                     | 18.4%(406)  | 19.8%(367)  | 16.6%(173) | 18.6%(23)  | 15.9%(482)  | 22.4%(939)  | 17.3%(408)  | 26.5%(26) | 18.9%(2824)  |         |
| Unknown                    | 3.6%(80)    | 4.1%(76)    | 2.6%(27)   | 0.8%(1)    | 3.1%(94)    | 4.7%(199)   | 2.6%(61)    | 0%(0)     | 3.6%(538)    |         |
| Widowed                    | 4.7%(103)   | 4.5%(84)    | 5.0%(52)   | 2.4%(3)    | 5.2%(157)   | 3.5%(148)   | 5.5%(130)   | 7.1%(7)   | 4.6%(684)    |         |
| <b>Geographic Location</b> |             |             |            |            |             |             |             |           |              |         |
| Rural, NC                  | 7.2%(158)   | 7.4%(138)   | 11.9%(124) | 12.1%(15)  | 9.7%(295)   | 7.3%(308)   | 9.4%(221)   | 17.4%(17) | 8.6%(1276)   | <<0.001 |
| Urban, NC                  | 82.4%(1820) | 87.2%(1621) | 77.1%(805) | 72.6%(90)  | 82.3%(2491) | 87.5%(3671) | 81.3%(1914) | 77.6%(76) | 83.8%(12488) |         |
| Other                      | 10.4%(230)  | 5.3%(99)    | 11.0%(115) | 15.3%(19)  | 8.0%(242)   | 5.2%(218)   | 9.3%(218)   | 5.1%(5)   | 7.7%(1146)   |         |
| <b>Primary Insurance</b>   |             |             |            |            |             |             |             |           |              |         |
| Medicare                   | 25.2%(556)  | 20.8%(387)  | 25.9%(270) | 23.4%(29)  | 27.2%(823)  | 17.6%(738)  | 28.9%(679)  | 32.7%(32) | 23.6%(3514)  | <<0.001 |
| Medicaid                   | 0.5%(10)    | 0.9%(17)    | 2.5%(26)   | 3.2%(4)    | 1.9%(58)    | 0.8%(33)    | 0.6%(15)    | 2.0%(2)   | 1.1%(165)    |         |
| Worker's Compensation      | 0.9%(20)    | 1.9%(35)    | 0.6%(6)    | 0.8%(1)    | 0.4%(12)    | 1%(42)      | 0.9%(21)    | 1.0%(1)   | 0.9%(138)    |         |
| Privately Insured          | 73.5%(1622) | 76.4%(1419) | 71.1%(742) | 72.6%(90)  | 70.5%(2135) | 80.6%(3384) | 69.6%(1638) | 64.3%(63) | 74.4%(11093) |         |
| <b>Secondary Insurance</b> |             |             |            |            |             |             |             |           |              |         |
| Medicare                   | 7.7%(169)   | 6.5%(121)   | 8.0%(83)   | 7.3%(9)    | 7.8%(235)   | 5.5%(229)   | 9.8%(231)   | 11.2%(11) | 7.3%(1088)   | <<0.001 |



|                                            |             |             |            |            |             |             |             |            |              |         |
|--------------------------------------------|-------------|-------------|------------|------------|-------------|-------------|-------------|------------|--------------|---------|
| Medicaid                                   | 1.3%(28)    | 1.5%(28)    | 3.7%(39)   | 3.2%(4)    | 3.0%(90)    | 1.6%(67)    | 2.1%(49)    | 6.1%(6)    | 2.1%(311)    |         |
| Worker's Compensation                      | 0.3%(6)     | 0.4%(8)     | 0.3%(3)    | 0%(0)      | 0.3%(8)     | 0.3%(13)    | 0.3%(7)     | 1.0%(1)    | 0.3%(46)     |         |
| Privately Insured                          | 90.8%(2005) | 91.6%(1701) | 88.0%(919) | 89.5%(111) | 89%(2695)   | 92.6%(3888) | 87.8%(2066) | 81.6%(80)  | 90.3%(13465) |         |
| <b>Questionnaire Type Completed</b>        |             |             |            |            |             |             |             |            |              |         |
| PROMIS Short Forms (8 domains)             | 74.7%(1650) | 70.8%(1316) | 71.7%(749) | 76.6%(95)  | 74.1%(2243) | 68.6%(2879) | 64.9%(1526) | 69.4%(68)  | 70.6%(10526) | <<0.001 |
| PROMIS CAT (4 domains)                     | 25.3(558)   | 29.2 (542)  | 28.3(295)  | 23.4%(29)  | 28.9 (785)  | 31.4 (1318) | 35.2(827)   | 30.6(30)   | 29.4 (4384)  |         |
| <b>Year PROMIS Questionnaire Completed</b> |             |             |            |            |             |             |             |            |              |         |
| 2017                                       | 2.9%(65)    | 2.5%(47)    | 3.5%(37)   | 6.5%(8)    | 4.9%(149)   | 3.3%(138)   | 3.3%(77)    | 3.1%(3)    | 3.5%(524)    | <<0.001 |
| 2018                                       | 66.2%(1462) | 63.2%(1175) | 63.1%(659) | 65.3%(81)  | 64.8%(1961) | 61.6%(2587) | 57.5%(1353) | 61.2%(60)  | 62.6%(9338)  |         |
| 2019                                       | 30.8%(681)  | 34.2%(636)  | 33.3%(348) | 28.2%(35)  | 30.3%(918)  | 35.1%(1472) | 39.2%(923)  | 35.71%(35) | 33.9%(5048)  |         |

\*mean(sd), %(n)

## PROMIS Scores

As presented in **table 2**, the adjusted mean scores for the PROMIS domains for the entire cohort were 38.14(38.00,38.28) for physical function, 58.84(58.71,58.98) for pain interference, 4.57(4.53,4.62) for pain intensity (on a 0 to 10 scale), 47.87(47.73,48.01) for depression, 49.85(49.67,50.03) for anxiety, 50.49(50.29,50.68) for fatigue, 51.08(50.92,51.24) for sleep disturbance and 49.06(48.86,49.25) for ability to participate in social roles. Higher pain interference and lower physical function were at least 0.5 and -1.0 standard deviations away, respectively, from the average US general population.

**Table 2. Summary of Scores for PROMIS Domains by Clinical Subspecialty**

|  | Foot and ankle | Hand | Neurosurgery | Orthopaedic Oncology | Spine | Sports medicine | Total Joint Arthroplasty | Trauma | Total Cohort | Sample Size |
|--|----------------|------|--------------|----------------------|-------|-----------------|--------------------------|--------|--------------|-------------|
|--|----------------|------|--------------|----------------------|-------|-----------------|--------------------------|--------|--------------|-------------|

|                                        |                     |                     |                     | y                   |                     |                     | asty                |                     |                     |          |
|----------------------------------------|---------------------|---------------------|---------------------|---------------------|---------------------|---------------------|---------------------|---------------------|---------------------|----------|
| <b>Physical Health Domains</b>         |                     |                     |                     |                     |                     |                     |                     |                     |                     |          |
| Physical function                      | 39.82(39.46, 40.17) | 41.79(41.41, 42.18) | 35.13(34.61, 35.65) | 38.41(36.92, 39.89) | 35.71(35.41, 36.02) | 39.13(38.88, 39.39) | 36.61(36.27, 36.96) | 31.60(29.92, 33.28) | 38.14(38.00, 38.28) | n=14,748 |
| Ability to participate in social roles | 50.53(50.05, 51.01) | 52.32(51.77, 52.86) | 44.30(43.59, 45.02) | 47.49(45.48, 49.49) | 46.30(45.89, 46.72) | 50.88(50.51, 51.25) | 47.93(47.42, 48.44) | 43.65(41.23, 46.08) | 49.06(48.86, 49.25) | n=10,451 |
| Pain intensity                         | 4.07(3.96, 4.19)    | 3.71(3.58, 3.84)    | 5.48(5.31, 5.65)    | 4.02(3.54, 4.50)    | 5.35(5.25, 5.45)    | 4.26(4.17, 4.35)    | 4.90(4.78, 5.03)    | 4.79(4.20, 5.36)    | 4.57(4.53, 4.62)    | n=10,424 |
| Pain interference                      | 57.25(56.92, 57.58) | 55.65(55.29, 56.02) | 61.56(61.08, 62.04) | 57.47(56.08, 58.86) | 61.21(60.93, 61.49) | 58.01(57.77, 58.25) | 60.03(59.71, 60.35) | 60.97(59.37, 62.56) | 58.84(58.71, 58.98) | n=14,474 |
| Fatigue                                | 49.13(48.65, 49.62) | 48.61(48.06, 49.15) | 54.94(54.22, 55.66) | 52.14(50.12, 54.15) | 53.22(52.81, 53.64) | 47.78(48.42, 49.15) | 50.31(49.80, 50.82) | 53.82(51.42, 56.21) | 50.49(50.29, 50.68) | n=10,452 |
| Sleep disturbance                      | 49.20(48.80, 49.61) | 49.73(49.29, 50.17) | 53.85(53.26, 54.43) | 50.83(49.14, 52.51) | 53.08(52.73, 53.42) | 50.36(50.07, 50.66) | 51.26(50.87, 51.65) | 53.46(51.54, 55.39) | 51.08(50.92, 51.24) | n=14,465 |
| <b>Mental Health Domains</b>           |                     |                     |                     |                     |                     |                     |                     |                     |                     |          |
| Anxiety                                | 48.61(48.16, 49.06) | 49.00(48.49, 49.51) | 52.65(51.99, 53.32) | 53.18(51.32, 55.04) | 51.69(51.30, 52.07) | 48.72(48.37, 49.06) | 49.64(49.17, 50.11) | 52.00(49.77, 54.24) | 49.85(49.67, 50.03) | n=10,351 |
| Depression                             | 47.07(46.70, 47.44) | 47.27(46.87, 47.67) | 50.22(49.69, 50.76) | 49.22(47.68, 50.77) | 49.36(49.05, 49.68) | 46.87(46.61, 47.14) | 47.66(47.31, 48.02) | 50.85(49.06, 52.64) | 47.87(47.73, 48.01) | n=14,391 |

\*mean(95% CI)

\*regression models adjusted for age, sex, race, ethnicity and questionnaire type

Table 3 provides more context to the range of observed health status scores by categorizing scores into degrees of severity: within normal limits, mild, moderate, and severe.[10,24,26] In this cohort, 24.9% of all patients reported their physical functioning within normal limits; the majority of patients (75%) reported mild, moderate, or severe limitations in physical functioning. There is a similar trend for pain interference, where 73% of patients reported mild, moderate, or severe limitations with pain interference. The majority of the cohort reported within normal limits for the ability to participate in social roles (63.5%), fatigue (68.0%), and sleep disturbance (66.0%). For the mental health domains (anxiety and depression), across the samples, most

1  
2  
300 patients reported normal limits for anxiety (69.6%) and depression (76.8%). Few patients reported severe  
4  
501 symptoms of anxiety (1.7%) and depression (1.1%).  
6  
7  
202  
8  
9  
10  
11  
12  
13  
14  
15  
16  
17  
18  
19  
20  
21  
22  
23  
24  
25  
26  
27  
28  
29  
30  
31  
32  
33  
34  
35  
36  
37  
38  
39  
40  
41  
42  
43  
44  
45  
46  
47  
48  
49  
50  
51  
52  
53  
54  
55  
56  
57  
58  
59  
60

For peer review only

Table 3: PROMIS Severity Categories by Clinical Subspecialty

|                                               | Foot and ankle | Hand  | Neurosurgery | Orthopaedic Oncology | Spine | Sports medicine | Total Joint Arthroplasty | Trauma | Total |
|-----------------------------------------------|----------------|-------|--------------|----------------------|-------|-----------------|--------------------------|--------|-------|
| <b>Physical Health Domains</b>                |                |       |              |                      |       |                 |                          |        |       |
| <b>Physical function</b>                      |                |       |              |                      |       |                 |                          |        |       |
| Within Normal limits                          | 29.6%          | 40.5% | 16.2%        | 32.3%                | 15.7% | 29.1%           | 16.6%                    | 11.3%  | 24.9% |
| Mild                                          | 22.9%          | 20.7% | 13.1%        | 11.3%                | 15.0% | 22.1%           | 20.0%                    | 8.3%   | 19.5% |
| Moderate                                      | 30.7%          | 26.4% | 38.9%        | 33.1%                | 40.5% | 33.3%           | 40.2%                    | 29.9%  | 35.0% |
| Severe                                        | 16.7%          | 12.5% | 31.8%        | 23.4%                | 28.8% | 15.4%           | 23.2%                    | 50.5%  | 20.6% |
| <b>Ability to participate in social roles</b> |                |       |              |                      |       |                 |                          |        |       |
| Within Normal limits                          | 67.3%          | 74.3% | 42.2%        | 51.6%                | 52.8% | 72.8%           | 60.6%                    | 44.6%  | 63.5% |
| Mild                                          | 18.4%          | 13.9% | 23.4%        | 24.2%                | 21.3% | 14.2%           | 18.9%                    | 15.4%  | 17.8% |
| Moderate                                      | 11.5%          | 9.6%  | 24.9%        | 20.0%                | 19.5% | 10.3%           | 16.1%                    | 24.6%  | 14.4% |
| Severe                                        | 2.9%           | 2.2%  | 9.5%         | 4.2%                 | 6.4%  | 2.7%            | 4.4%                     | 15.4%  | 4.3%  |
| <b>Pain interference</b>                      |                |       |              |                      |       |                 |                          |        |       |
| Within Normal limits                          | 33.8%          | 43.7% | 16.3%        | 33.1%                | 16.7% | 29.8%           | 20.3%                    | 21.7%  | 27.0% |
| Mild                                          | 23.6%          | 24.3% | 16.7%        | 16.5%                | 21.4% | 28.4%           | 24.3%                    | 13.0%  | 24.1% |
| Moderate                                      | 39.4%          | 28.8% | 59.7%        | 46.3%                | 55.8% | 38.0%           | 49.0%                    | 55.4%  | 44.1% |
| Severe                                        | 3.2%           | 3.3%  | 7.4%         | 4.1%                 | 6.2%  | 3.7%            | 6.5%                     | 9.8%   | 4.8%  |
| <b>Fatigue</b>                                |                |       |              |                      |       |                 |                          |        |       |
| Within Normal limits                          | 73.4%          | 73.9% | 50.7%        | 63.2%                | 57.2% | 74.4%           | 70.6%                    | 55.2%  | 68.0% |
| Mild                                          | 12.3%          | 11.3% | 17.7%        | 13.7%                | 17.1% | 12.3%           | 13.8%                    | 17.9%  | 13.9% |
| Moderate                                      | 12.0%          | 12.2% | 24.6%        | 20.0%                | 21.8% | 11.0%           | 13.2%                    | 20.9%  | 15.1% |
| Severe                                        | 2.3%           | 2.7%  | 7.0%         | 3.2%                 | 3.9%  | 2.3%            | 2.4%                     | 6.0%   | 3.1%  |
| <b>Sleep disturbance</b>                      |                |       |              |                      |       |                 |                          |        |       |
| Within Normal limits                          | 74.3%          | 71.5% | 54.3%        | 67.2%                | 58.0% | 69.0%           | 64.8%                    | 55.3%  | 66.0% |

|                              |       |       |       |       |       |       |       |       |       |
|------------------------------|-------|-------|-------|-------|-------|-------|-------|-------|-------|
| Mild                         | 13.7% | 14.1% | 17.5% | 18.0% | 18.1% | 14.4% | 16.0% | 13.8% | 15.5% |
| Moderate                     | 10.5% | 11.7% | 22.3% | 11.5% | 19.3% | 13.7% | 16.1% | 23.4% | 15.1% |
| Severe                       | 1.6%  | 2.7%  | 5.9%  | 3.3%  | 4.7%  | 2.9%  | 3.0%  | 7.5%  | 3.3%  |
| <b>Mental Health Domains</b> |       |       |       |       |       |       |       |       |       |
| <b>Anxiety</b>               |       |       |       |       |       |       |       |       |       |
| Within Normal limits         | 74.6% | 71.6% | 59.7% | 55.8% | 62.0% | 73.4% | 72.5% | 60.6% | 69.6% |
| Mild                         | 14.0% | 14.8% | 16.2% | 22.1% | 17.2% | 14.7% | 15.2% | 16.7% | 15.4% |
| Moderate                     | 10.5% | 11.4% | 20.2% | 19.0% | 18.9% | 10.9% | 10.7% | 19.7% | 13.4% |
| Severe                       | 0.9%  | 2.1%  | 3.9%  | 3.2%  | 1.9%  | 1.1%  | 1.6%  | 3.0%  | 1.7%  |
| <b>Depression</b>            |       |       |       |       |       |       |       |       |       |
| Within Normal limits         | 80.7% | 78.3% | 66.5% | 71.9% | 71.5% | 79.9% | 78.6% | 65.6% | 76.8% |
| Mild                         | 12.1% | 12.0% | 15.9% | 14.9% | 14.9% | 12.2% | 12.5% | 20.0% | 13.1% |
| Moderate                     | 6.5%  | 8.2%  | 15.2% | 12.4% | 12.3% | 7.3%  | 8.0%  | 12.2% | 9.1%  |
| Severe                       | 0.6%  | 1.5%  | 2.5%  | 0.8%  | 1.4%  | 0.7%  | 1.0%  | 2.2%  | 1.1%  |

In **table 4**, we examine the correlation of unadjusted PROMIS domains in the cohort. As expected, we found high correlations between depression and anxiety ( $r=0.76$ ) and pain interference and pain intensity ( $r=0.75$ ). Additionally, we found moderate correlations between commonly administered PROMIS domains in Orthopaedics - physical function and pain interference ( $r=-0.60$ ) and physical function and pain intensity ( $r=0.52$ ). There was a low correlation found between anxiety and pain intensity ( $r=0.30$ ), anxiety, and pain interference ( $r=0.36$ ), anxiety, and physical function ( $r=-0.32$ ). Similar trends were found with depression where low correlations between depression and pain intensity ( $r=0.29$ ), depression, and pain interference ( $r=0.39$ ), depression, and physical function ( $r=-0.30$ ).

**Table 4: Correlation of PROMIS Domains**

|                   | Participation | Anxiety | Depression | Fatigue | Pain Intensity | Pain Interference | Physical Function | Sleep Disturbance |
|-------------------|---------------|---------|------------|---------|----------------|-------------------|-------------------|-------------------|
| Participation     | -             | -0.48   | -0.51      | -0.66   | -0.52          | -0.69             | 0.67              | -0.45             |
| Anxiety           | -0.48         | -       | 0.76       | 0.58    | 0.30           | 0.36              | -0.32             | 0.44              |
| Depression        | -0.51         | 0.76    | -          | 0.58    | 0.29           | 0.39              | -0.30             | 0.43              |
| Fatigue           | -0.66         | 0.58    | 0.58       | -       | 0.42           | 0.52              | -0.48             | 0.54              |
| Pain Intensity    | -0.52         | 0.30    | 0.29       | 0.42    | -              | 0.75              | -0.52             | 0.39              |
| Pain Interference | -0.69         | 0.36    | 0.39       | 0.52    | 0.75           | -                 | -0.60             | 0.45              |

|                   |       |       |       |       |       |       |       |       |
|-------------------|-------|-------|-------|-------|-------|-------|-------|-------|
| Physical Function | 0.67  | -0.32 | -0.30 | -0.48 | -0.52 | -0.60 | -     | -0.31 |
| Sleep Disturbance | -0.45 | 0.44  | 0.43  | 0.54  | 0.39  | 0.45  | -0.31 | -     |

\*all correlations were statistically significant  $P < 0.001$

## PROMIS Scores by Major Clinical Specialties

### Foot and Ankle

Patients consulting with a foot and ankle orthopedic specialist scored less than 0.5 SD from the mean for all domains except for pain interference, where patients reported a mean score of 57.2(8.6). When looking at the clinically interpretable categories for physical function, 30.7% of patients reported moderate limitations and 16.7% severe limitations. For pain interference, 39.4% reported moderate and limitations, and 3.2% reported severe limitations.

### Hand

Patients who consulted with a hand orthopedic specialist reported scores less than 0.5 SD from the mean for all domains except pain interference and physical function. Patients reported a mean score of 55.7(8.8) and 41.85(9.5), respectively. For physical function, 26.4% of patients reported moderate limitations, and 12.5% reported severe limitations.

### Neurosurgery and Spine

Patients either consulting with a neurosurgeon or a spine orthopedic specialist reported between 1- 1.5 standard deviations from the US mean for pain interference and physical functioning. Neurosurgery patients reported higher levels of pain interference (61.53(8.1)) compared to spine patients (57.23(9.7)) and also reported more limitations in physical functioning (35.0(9.0)) as compared to spine patients (38.35(10.5)). For physical function, a majority of neurosurgery patients reported moderate (38.9%) and severe (31.8%) limitations, and this was similar in spine patients (moderate- 40.5%, severe 28.8%). Pain interference, most neurosurgery (59.7%) and Spine patients (55.8%) reported moderate limitations, and a small percentage of neurosurgery (7.4%) and spine patients (6.2%) reported severe limitations.

### Sports Medicine

1  
2  
3  
4 Patients seeking care from a sports medicine specialist reported less than 0.5 SD from the US mean in  
5  
6 all domains except physical function (39.51(8.8)) and pain interference (58.0(7.6)) where their scores were  
7  
8 between 0.5-1.0 SD from the US mean. 33.3% of patients reported moderate limitations in physical function,  
9  
10 and 15.4% reported severe limitations. For pain interference, 38.0% of patients reported moderate limitations,  
11  
12 and 3.7% reported severe limitations.

### 13 14 15 Total Joint Arthroplasty

16  
17 Patients consulting a Total Joint Arthroplasty Orthopaedic Surgeon reported less than 0.5 SD from the  
18  
19 US mean in all domains except physical functioning (36.58(8.5)) and pain interference (60.21(8.4)). Most  
20  
21 patients reported moderate limitations in physical functioning (40.2%) and pain interference (48.9%), and  
22  
23 23.2% reported severe limitations in physical function, and only a small percentage reported severe limitations  
24  
25 for pain interference (6.5%).

26  
27 We did not report on Trauma or Orthopaedic Oncology due to low sample sizes in each of these  
28  
29 subspecialties.

## 30 31 DISCUSSION

32  
33 The goal of PROMIS was to create a measurement system that could standardize of PROs across  
34  
35 chronic conditions to better enable comparisons across different disease conditions.[14] To this end, we  
36  
37 described approximately 15,000 orthopedic patients across eight different clinical subspecialties who  
38  
39 completed PROMIS measures associated with a new patient consultation with an orthopedic specialist. We  
40  
41 found across an orthopaedic department at an academic medical center, that most patients reported scores  
42  
43 within 0.5 SD from the US mean on all domains except pain interference and physical functioning; where they  
44  
45 reported approximately 1.0 SD US mean on pain interference and physical functioning . These findings are  
46  
47 expected, where the primary drivers of seeking care for orthopedic issues are decreased physical functioning  
48  
49 and increased interference with activities due to pain.[28][29] When further examining the difference of  
50  
51 PROMIS scores between the clinical subspecialties for the physical health domains, we found that patients  
52  
53 seeking care from hand specialists reported less overall physical health impairments. However, we primarily  
54  
55 attribute this finding to administering the generic PROMIS physical function measure rather than the upper  
56  
57  
58  
59  
60

1  
2  
3  
4 265 extremity physical function PROMIS measure, which is more specific to upper extremity conditions and may  
5  
6 266 better reflect limitations in this group.[30] Patients seeking care from a Neurosurgery, Spine, or a Trauma  
7  
8 267 specialist reported significant physical health impairments. When examining PROMIS mental health domains,  
9  
10 268 most patients across clinical subspecialties reported that their anxiety and depression symptoms were within  
11  
12 269 normal limits; however, up to 24.1% reported moderate or severe anxiety and up to 17.6% reported moderate  
13  
14 270 or severe depressive symptoms. Following a similar trend as the specialties across the PROMIS physical  
15  
16 271 health domains, patients seeking care from a Neurosurgery, Spine, or Trauma specialist reported the highest  
17  
18 272 anxiety and depression symptoms. This relationship is consistent with literature supporting patients with spine  
19  
20 273 conditions, and orthopedic trauma have higher anxiety levels than other orthopedic conditions.[31,32]

21  
22 274 Majority of patients seeking care in orthopaedics across clinical subspecialties do so because of  
23  
24 275 limitations in physical function and pain.[33–35] Measurement of these constructs can be done using PROMs.  
25  
26 276 Many legacy measures commonly used in orthopaedics measure more than one construct. This makes it  
27  
28 277 difficult to elucidate limitations or symptom contributions from a specific construct on a patient's perception of  
29  
30 278 their health status. For example, a patient seeking care for knee osteoarthritis may report more limitations in  
31  
32 279 physical functioning rather than pain. Using traditional, concise legacy measures such as Knee Injury and  
33  
34 280 Osteoarthritis Outcome Score Junior (KOOS Jr) [36] to evaluate stiffness, pain, function and activities of daily  
35  
36 281 living using 7 items would be challenging to isolate the relative limitations in physical functioning compared to  
37  
38 282 the other constructs included in the KOOS Jr. Whereas, PROMIS PF can be administered to capture this  
39  
40 283 construct separately and concisely, giving a valid estimate of a patient's perception of their physical function.  
41  
42 284 PROMIS PF and has been shown to be equal or superior in regard to floor and ceiling effects when compared  
43  
44 285 with previously established legacy PROM in several patient populations including trauma, shoulder, elbow,  
45  
46 286 hand, spine, and knee; making this measure applicable across patient populations and range of severity of  
47  
48 287 symptoms. [37] However a noted limitation is, to date, not all PROMIS measures have been evaluated for floor  
49  
50 288 and ceiling effects across multiple populations or found to be as responsive as PROMIS PF for Orthopaedic  
51  
52 289 patients. In particular, PROMIS measures that capture emotional distress and psychosocial illness impact have  
53  
54 290 not been extensively researched for wide-spread use in Orthopaedics [31].  
55  
56  
57  
58  
59  
60



## Strengths and Limitations

Our study has noted strengths. First, our study is novel in that we reported eight PROMIS domains across eight different orthopedic clinical subspecialties. The use of PROMIS measures in clinical practice and research has been increasing in prevalence in spine, total joint, sports medicine, upper extremity disorders, trauma, and lower extremity disorders.[38] In a systematic review on the uptake of PROMIS measures in Orthopaedics, they found that studies typically report around three PROMIS domains.[38] Our study is the first that we are aware of to report and directly compare differences in these eight health domains across orthopaedic clinical subspecialties, providing baseline for PROMIS scores in orthopaedic. The direct comparisons reported in this paper would not be possible if using region-specific measures common to orthopedic practice and research. By implementing PROMIS measures as a standard set of outcome measures, we can draw inferences about differences in patient-reported health status across orthopedic populations that are typically not compared. Second, our study reported a clinical interpretation of PROMIS scores addressing the reported barrier to PROMIS use uptake.[8,39] Providing a clinical interpretation is vital because often there is a disconnect between mean PROMIS scores (i.e., physical functioning score- 38.2) and how to interpret this information (moderate limitations in physical functioning).[39]

Our study is not without limitations. First, this was a cross-sectional cohort analysis, so we did not report PROMIS measures beyond baseline. Therefore, we cannot identify predictors of clinical outcomes or compare the change in PROMIS scores across subspecialties over time or downstream utilization of Orthopaedic procedures or rehabilitation services associated with baseline scores. Second, our findings may have limited generalizability. For example, the setting was a private hospital. It may not capture the broad diversity of non-white individuals in the area (79.3% of individuals reported being Caucasian). Our instruments were only available in English, limiting data collection on non-English speaking patients. Moreover, in some clinical subspecialties reported (i.e., trauma and orthopedic oncology), small sample sizes potentially limit generalizability of these findings. Lastly, we did not compare PROMIS upper extremity physical function or legacy measures to our PROMIS measures as part of this study. Therefore we cannot make direct

1  
2  
3  
4  
5  
6  
7  
8  
9  
10  
11  
12  
13  
14  
15  
16  
17  
18  
19  
20  
21  
22  
23  
24  
25  
26  
27  
28  
29  
30  
31  
32  
33  
34  
35  
36  
37  
38  
39  
40  
41  
42  
43  
44  
45  
46  
47  
48  
49  
50  
51  
52  
53  
54  
55  
56  
57  
58  
59  
60

comparisons of the performance of the eight reported PROMIS domains in this study to legacy or PROMIS upper extremity. However, the relationship between legacy measures in orthopedics and PROMIS measures is well documented in the literature. [40]

Our study's findings are consistent with other literature regarding orthopedic populations' physical and mental health status. [41] In comparison to a study by Perruccio et al. (2013) using the SF-36 as the outcome measure to physical and mental health in patients seeking care for musculoskeletal disorders, we found similar results where patients with spine disorders reported the most impairments in the cohort. [41] Additionally, consistent with our results, they found hand upper extremity/hand patients were the healthiest, and total joint arthroplasty patients demonstrated low levels of physical functioning. Our study's unexpected finding low levels of sleep disturbance, fatigue, and depression reported across clinical subspecialties. Sleep disruption and pain frequently co-occur; both are uniquely linked with depressed mood [42–45] and various forms of functional disability [46–48]. Depression appears to play a substantial role in the sleep-pain linkage, particularly where the pain is severe. [49] However, in our study, we did not find this relationship between pain, physical function, sleep disturbance, and depression in the cohort, despite the research supporting these relationships. [49]

### Conclusions

Reporting patients' health status consulting an Orthopaedic provider using a standard set of outcome measures across various clinical subspecialties has numerous clinical care and research implications. Understanding the health status and clinical examination measures may improve patient and provider communication during the clinical encounter [50] and be used as part of the prognostic evaluation. [51] Moreover, this study can provide a context for informing bundled care or value-based care models. Classifying heterogeneous orthopedic patients' baseline status on a standard metric could better inform the effectiveness and cost of treatment pathways.[52] Lastly, reporting PROMIS scores has allowed the direct comparison of eight meaningful constructs across orthopedic subspecialties. This comparison would not be possible with legacy measures, which is a noted strength of PROMIS measures. These comparisons allow unique insights to be made for orthopedic departments and align clinical and research data collection with value-based care

1  
2  
3 initiatives outside of orthopedic departments. Clinicians and administrators can use this information to improve  
4  
5 the delivery and the efficiency of care, improve and inform referral practices, and inform subspecialty-specific  
6  
7 education to improve patient outcomes from orthopedic care.  
8  
9

10  
11  
12 **Acknowledgments:** We would like to acknowledge the Comprehensive Outcomes in Orthopaedics and  
13  
14 Rehabilitation Data System (COORDS) group for supporting the infrastructure for data collection. We would  
15  
16 also like to acknowledge Jennifer Gagnon for her contribution to data acquisition.  
17

18  
19 **Competing Interests:** none declared

20  
21 **Funding:** his research received no specific grant from any funding agency in public, commercial or not-for-  
22  
23 profit sectors

24  
25 **Ethics Statement:** We obtained IRB approval from Duke University for data extraction and analysis of the  
26  
27 collected data for this study (Pro00091740)  
28

29  
30 **Author Contributions:** Maggie Horn contributed to the work's conception, design of the study, data  
31  
32 acquisition, and writing of the manuscript. Steven George contributed to the conception of the work, design of  
33  
34 the manuscript's study, and writing. Emily Reinke contributed to the conception of the work, design of the  
35  
36 study, data acquisition, and writing the manuscript. Xiaofang Yan and Sheng Luo contributed to the study's  
37  
38 design and statistical analysis. Michael Bolognesi contributed to the design of the manuscript's study and  
39  
40 writing. Bryce Reeve contributed to the design of the manuscript's study and writing. All authors had final  
41  
42 approval of the manuscript.  
43

44  
45 **Data Availability:** Data are not available in accordance with protections provided by the HIPAA privacy  
46  
47 information policy.  
48  
49

1  
2  
3  
4  
5  
6  
7  
8  
9  
10  
11  
12  
13  
14  
15  
16  
17  
18  
19  
20  
21  
22  
23  
24  
25  
26  
27  
28  
29  
30  
31  
32  
33  
34  
35  
36  
37  
38  
39  
40  
41  
42  
43  
44  
45  
46  
47  
48  
49  
50  
51  
52  
53  
54  
55  
56  
57  
58  
59  
60

FIGURE 1: Flow diagram for cohort selection.

For peer review only

## REFERENCES

- 1 Jones RS, Stukenborg GJ. Patient-Reported Outcomes Measurement Information System (PROMIS) Use in Surgical Care: A Scoping Study. *J Am Coll Surg* 2017;**224**:245–54.e1. doi:10.1016/j.jamcollsurg.2016.11.015
- 2 Nelson EC, Eftimovska E, Lind C, *et al*. Patient reported outcome measures in practice. *BMJ* 2015;**350**:g7818. doi:10.1136/bmj.g7818
- 3 Hung M, Stuart AR, Higgins TF, *et al*. Computerized Adaptive Testing Using the PROMIS Physical Function Item Bank Reduces Test Burden With Less Ceiling Effects Compared With the Short Musculoskeletal Function Assessment in Orthopaedic Trauma Patients. *Journal of Orthopaedic Trauma*. 2014;**28**:439–43. doi:10.1097/bot.0000000000000059
- 4 Sikorskii A, Victorson D, O'Connor P, *et al*. PROMIS and legacy measures compared in a supportive care intervention for breast cancer patients and caregivers: Experience from a randomized trial. *Psychooncology* 2018;**27**:2265–73. doi:10.1002/pon.4825
- 5 PROMIS. <https://www.healthmeasures.net/score-and-interpret/interpret-scores/promis> (accessed 9 Jul 2020).
- 6 Kortlever JTP, Leyton-Mange A, Keulen MHF, *et al*. PROMIS Physical Function Correlates with KOOS, JR in Patients with Knee Pain. *J Knee Surg* 2020;**33**:903–11. doi:10.1055/s-0039-1688780
- 7 Moore MLG, Kortlever JTP, Keulen MHF, *et al*. PROMIS PF correlates with HOOS, JR in patients with hip pain. *J Orthop* 2020;**21**:58–61. doi:10.1016/j.jor.2020.01.048
- 8 Brodke DJ, Saltzman CL, Brodke DS. PROMIS for Orthopaedic Outcomes Measurement. *J Am Acad Orthop Surg* 2016;**24**:744–9. doi:10.5435/JAAOS-D-15-00404
- 9 Jildeh TR, Lizzio VA, Meta F, *et al*. The Correlation Between PROMIS Pain Interference and VAS Pain in Ambulatory Orthopedic Patients. *Orthopedics* 2018;**41**:e813–9. doi:10.3928/01477447-20180912-06
- 10 Cella D, Riley W, Stone A, *et al*. The Patient-Reported Outcomes Measurement Information System (PROMIS) developed and tested its first wave of adult self-reported health outcome item banks: 2005–2008. *Journal of Clinical Epidemiology*. 2010;**63**:1179–94. doi:10.1016/j.jclinepi.2010.04.011
- 11 Wilson I, Bohm E, Lübbecke A, *et al*. Orthopaedic registries with patient-reported outcome measures. *EFORT Open Rev* 2019;**4**:357–67. doi:10.1302/2058-5241.4.180080
- 12 Flynn KE, Dew MA, Lin L, *et al*. Reliability and construct validity of PROMIS® measures for patients with heart failure who undergo heart transplant. *Qual Life Res* 2015;**24**:2591–9. doi:10.1007/s11136-015-1010-y
- 13 Choi SW, Reise SP, Pilkonis PA, *et al*. Efficiency of static and computer adaptive short forms compared to full-length measures of depressive symptoms. *Qual Life Res* 2010;**19**:125–36. doi:10.1007/s11136-009-9560-5
- 14 Segawa E, Schalet B, Cella D. A comparison of computer adaptive tests (CATs) and short forms in terms of accuracy and number of items administered using PROMIS profile. *Qual Life Res* 2020;**29**:213–21. doi:10.1007/s11136-019-02312-8

- 1  
2  
3  
4  
5  
6  
7  
8  
9  
10  
11  
12  
13  
14  
15  
16  
17  
18  
19  
20  
21  
22  
23  
24  
25  
26  
27  
28  
29  
30  
31  
32  
33  
34  
35  
36  
37  
38  
39  
40  
41  
42  
43  
44  
45  
46  
47  
48  
49  
50  
51  
52  
53  
54  
55  
56  
57  
58  
59  
60
- 15 Bruce B, Fries J, Lingala B, *et al.* Development and assessment of floor and ceiling items for the PROMIS physical function item bank. *Arthritis Res Ther* 2013;**15**:R144. doi:10.1186/ar4327
  - 16 Amtmann D, Cook KF, Jensen MP, *et al.* Development of a PROMIS item bank to measure pain interference. *Pain* 2010;**150**:173–82. doi:10.1016/j.pain.2010.04.025
  - 17 Haefeli M, Elfering A. Pain assessment. *Eur Spine J* 2006;**15 Suppl 1**:S17–24. doi:10.1007/s00586-005-1044-x
  - 18 Pilkonis PA, Yu L, Dodds NE, *et al.* Validation of the depression item bank from the Patient-Reported Outcomes Measurement Information System (PROMIS®) in a three-month observational .... *Journal of psychiatric* Published Online First: 2014. <https://www.sciencedirect.com/science/article/pii/S0022395614001484>
  - 19 Pilkonis PA, Choi SW, Reise SP, *et al.* Item Banks for Measuring Emotional Distress From the Patient-Reported Outcomes Measurement Information System (PROMIS®): Depression, Anxiety, and Anger. *Assessment* 2011;**18**:263–83. doi:10.1177/1073191111411667
  - 20 Yu L, Buysse DJ, Germain A, *et al.* Development of short forms from the PROMIS™ sleep disturbance and Sleep-Related Impairment item banks. *Behav Sleep Med* 2011;**10**:6–24. doi:10.1080/15402002.2012.636266
  - 21 Lai J-S, Cella D, Choi S, *et al.* How item banks and their application can influence measurement practice in rehabilitation medicine: a PROMIS fatigue item bank example. *Arch Phys Med Rehabil* 2011;**92**:S20–7. doi:10.1016/j.apmr.2010.08.033
  - 22 Hahn EA, PROMIS Cooperative Group, DeWalt DA, *et al.* New English and Spanish social health measures will facilitate evaluating health determinants. *Health Psychology*. 2014;**33**:490–9. doi:10.1037/hea0000055
  - 23 Hahn EA, Devellis RF, Bode RK, *et al.* Measuring social health in the patient-reported outcomes measurement information system (PROMIS): item bank development and testing. *Qual Life Res* 2010;**19**:1035–44. doi:10.1007/s11136-010-9654-0
  - 24 Rothrock NE, Hays RD, Spritzer K, *et al.* Relative to the general US population, chronic diseases are associated with poorer health-related quality of life as measured by the Patient-Reported Outcomes Measurement Information System (PROMIS). *Journal of Clinical Epidemiology*. 2010;**63**:1195–204. doi:10.1016/j.jclinepi.2010.04.012
  - 25 Ripley BD. The R project in statistical computing. *MSOR Connections The newsletter of the LTSN Maths* Published Online First: 2001. <http://citeseerx.ist.psu.edu/viewdoc/download?doi=10.1.1.430.3979&rep=rep1&type=pdf>
  - 26 Score Cut Points. <https://www.healthmeasures.net/score-and-interpret/interpret-scores/promis/promis-score-cut-points> (accessed 27 Oct 2020).
  - 27 Mukaka MM. A guide to appropriate use of Correlation coefficient in medical research. *Malawi Med J* 2012;**24**:69–71. doi:10.4314/mmj.v24i3.
  - 28 Von Korff M, Scher AI, Helmick C, *et al.* United States National Pain Strategy for Population Research: Concepts, Definitions, and Pilot Data. *J Pain* 2016;**17**:1068–80. doi:10.1016/j.jpain.2016.06.009
  - 29 St. Sauver JL, Warner DO, Yawn BP, *et al.* Why Patients Visit Their Doctors: Assessing the Most

- 1  
2  
449 Prevalent Conditions in a Defined American Population. *Mayo Clin Proc* 2013;**88**:56–67.  
450 doi:10.1016/j.mayocp.2012.08.020  
5
- 451 30 Makhni EC, Meadows M, Hamamoto JT, *et al.* Patient Reported Outcomes Measurement Information  
452 System (PROMIS) in the upper extremity: the future of outcomes reporting? *J Shoulder Elbow Surg*  
453 2017;**26**:352–7. doi:10.1016/j.jse.2016.09.054  
9
- 454 31 Beleckas CM, Prather H, Guattery J, *et al.* Anxiety in the orthopedic patient: using PROMIS to assess  
455 mental health. *Qual Life Res* 2018;**27**:2275–82. doi:10.1007/s11136-018-1867-7  
12
- 456 32 McCrabb S, Baker AL, Attia J, *et al.* Comorbid tobacco and other substance use and symptoms of anxiety  
457 and depression among hospitalised orthopaedic trauma patients. *BMC Psychiatry* 2019;**19**:28.  
458 doi:10.1186/s12888-019-2021-y  
16
- 459 33 Perruccio AV, Davis AM, Hogg-Johnson S, *et al.* Importance of self-rated health and mental well-being in  
460 predicting health outcomes following total joint replacement surgery for osteoarthritis. *Arthritis Care Res*  
461 2011;**63**:973–81. <https://onlinelibrary.wiley.com/doi/abs/10.1002/acr.20467>  
20
- 462 34 Hopman WM, Towheed T, Anastassiades T, *et al.* Canadian normative data for the SF-36 health survey.  
463 *CMAJ* 2000;**163**:265–71. <https://www.cmaj.ca/content/163/3/265.short> (accessed 8 Nov 2020).  
23
- 464 35 Raad M, Amin RM, El Abiad JM, *et al.* Preoperative Patient Functional Status Is an Independent Predictor  
465 of Outcomes After Primary Total Hip Arthroplasty. *Orthopedics* 2019;**42**:e326–30. doi:10.3928/01477447-  
466 20190321-01  
25
- 467 36 Lyman S, Lee Y-Y, Franklin PD, *et al.* Validation of the KOOS, JR: A Short-form Knee Arthroplasty  
468 Outcomes Survey. *Clin Orthop Relat Res* 2016;**474**:1461–71. doi:10.1007/s11999-016-4719-1  
28
- 469 37 Gullledge CM, Lizzio VA, Smith DG, *et al.* What Are the Floor and Ceiling Effects of Patient-Reported  
470 Outcomes Measurement Information System Computer Adaptive Test Domains in Orthopaedic Patients?  
471 A Systematic Review. *Arthroscopy* Published Online First: 6 January 2020.  
472 doi:10.1016/j.arthro.2019.09.022  
31
- 473 38 Maggie E. Horn, Emily K. Reinke, Logan J. Couce, Bryce B. Reeve, Leila Ledbetter, Steven Z. George.  
474 Reporting and utilization of Patient-Reported Outcomes Measurement Information System? (PROMIS)  
475 measures in orthopedic research and practice: a systematic review. *J Orthop Surg Res*  
476 doi:10.1186/s13018-020-02068-9  
36
- 477 39 O'Hara NN, Richards JT, Overmann A, *et al.* Is PROMIS the new standard for patient-reported outcomes  
478 measures in orthopaedic trauma research? *Injury* Published Online First: 25 October 2019.  
479 doi:10.1016/j.injury.2019.10.076  
41
- 480 40 Cheung EC, Moore LK, Flores SE, *et al.* Correlation of PROMIS with Orthopaedic Patient-Reported  
481 Outcome Measures. *JBJS Rev* 2019;**7**:e9. doi:10.2106/JBJS.RVW.18.00190  
45
- 482 41 Perruccio AV, Gandhi R, Rampersaud YR, *et al.* Heterogeneity in health status and the influence of patient  
483 characteristics across patients seeking musculoskeletal orthopaedic care - a cross-sectional study. *BMC*  
484 *Musculoskelet Disord* 2013;**14**:83. doi:10.1186/1471-2474-14-83  
52
- 485 42 Chen Q, Hayman LL, Shmerling RH, *et al.* Characteristics of Chronic Pain Associated with Sleep Difficulty  
486 in Older Adults: The Maintenance of Balance, Independent Living, Intellect, and Zest in the Elderly  
487 (MOBILIZE) Boston Study. *Journal of the American Geriatrics Society*. 2011;**59**:1385–92.  
56  
57  
58  
59  
60

1  
2  
3  
4  
5  
6  
7  
8  
9  
10  
11  
12  
13  
14  
15  
16  
17  
18  
19  
20  
21  
22  
23  
24  
25  
26  
27  
28  
29  
30  
31  
32  
33  
34  
35  
36  
37  
38  
39  
40  
41  
42  
43  
44  
45  
46  
47  
48  
49  
50  
51  
52  
53  
54  
55  
56  
57  
58  
59  
60

doi:10.1111/j.1532-5415.2011.03544.x

- 43 McCurry SM, Von Korff M, Vitiello MV, *et al.* Frequency of comorbid insomnia, pain, and depression in older adults with osteoarthritis: predictors of enrollment in a randomized treatment trial. *J Psychosom Res* 2011;**71**:296–9. doi:10.1016/j.jpsychores.2011.05.012
- 44 Smith MT, Quartana PJ, Okonkwo RM, *et al.* Mechanisms by which sleep disturbance contributes to osteoarthritis pain: a conceptual model. *Curr Pain Headache Rep* 2009;**13**:447–54. doi:10.1007/s11916-009-0073-2
- 45 Cole JC, Dubois D, Kosinski M. Use of patient-reported sleep measures in clinical trials of pain treatment: a literature review and synthesis of current sleep measures and a conceptual model of sleep disturbance in pain. *Clinical Therapeutics*. 2007;**29**:2580–8. doi:10.1016/j.clinthera.2007.12.005
- 46 Goldman SE, Stone KL, Ancoli-Israel S, *et al.* Poor sleep is associated with poorer physical performance and greater functional limitations in older women. *Sleep* 2007;**30**:1317–24. doi:10.1093/sleep/30.10.1317
- 47 Guccione AA, Felson DT, Anderson JJ, *et al.* The effects of specific medical conditions on the functional limitations of elders in the Framingham Study. *Am J Public Health* 1994;**84**:351–8. doi:10.2105/ajph.84.3.351
- 48 McCracken LM, Iverson GL. Disrupted sleep patterns and daily functioning in patients with chronic pain. *Pain Res Manag* 2002;**7**:75–9. doi:10.1155/2002/579425
- 49 Finan PH, Goodin BR, Smith MT. The association of sleep and pain: an update and a path forward. *J Pain* 2013;**14**:1539–52. doi:10.1016/j.jpain.2013.08.007
- 50 Olde Rikkert MGM, van der Wees PJ, Schoon Y, *et al.* Using Patient Reported Outcomes Measures to Promote Integrated Care. *Int J Integr Care* 2018;**18**:8. doi:10.5334/ijic.3961
- 51 Wees PJVANDER, Van Der Wees PJ, Nijhuis-Van Der MW, *et al.* Integrating the Use of Patient-Reported Outcomes for Both Clinical Practice and Performance Measurement: Views of Experts from 3 Countries. *Milbank Quarterly*. 2014;**92**:754–75. doi:10.1111/1468-0009.12091
- 52 Porter ME, Others. What is value in health care. *N Engl J Med* 2010;**363**:2477–81. [http://www.academia.edu/download/30781672/2011-1\\_Porter\\_What-is-value-in-health-care\\_Appendix-1.pdf](http://www.academia.edu/download/30781672/2011-1_Porter_What-is-value-in-health-care_Appendix-1.pdf)



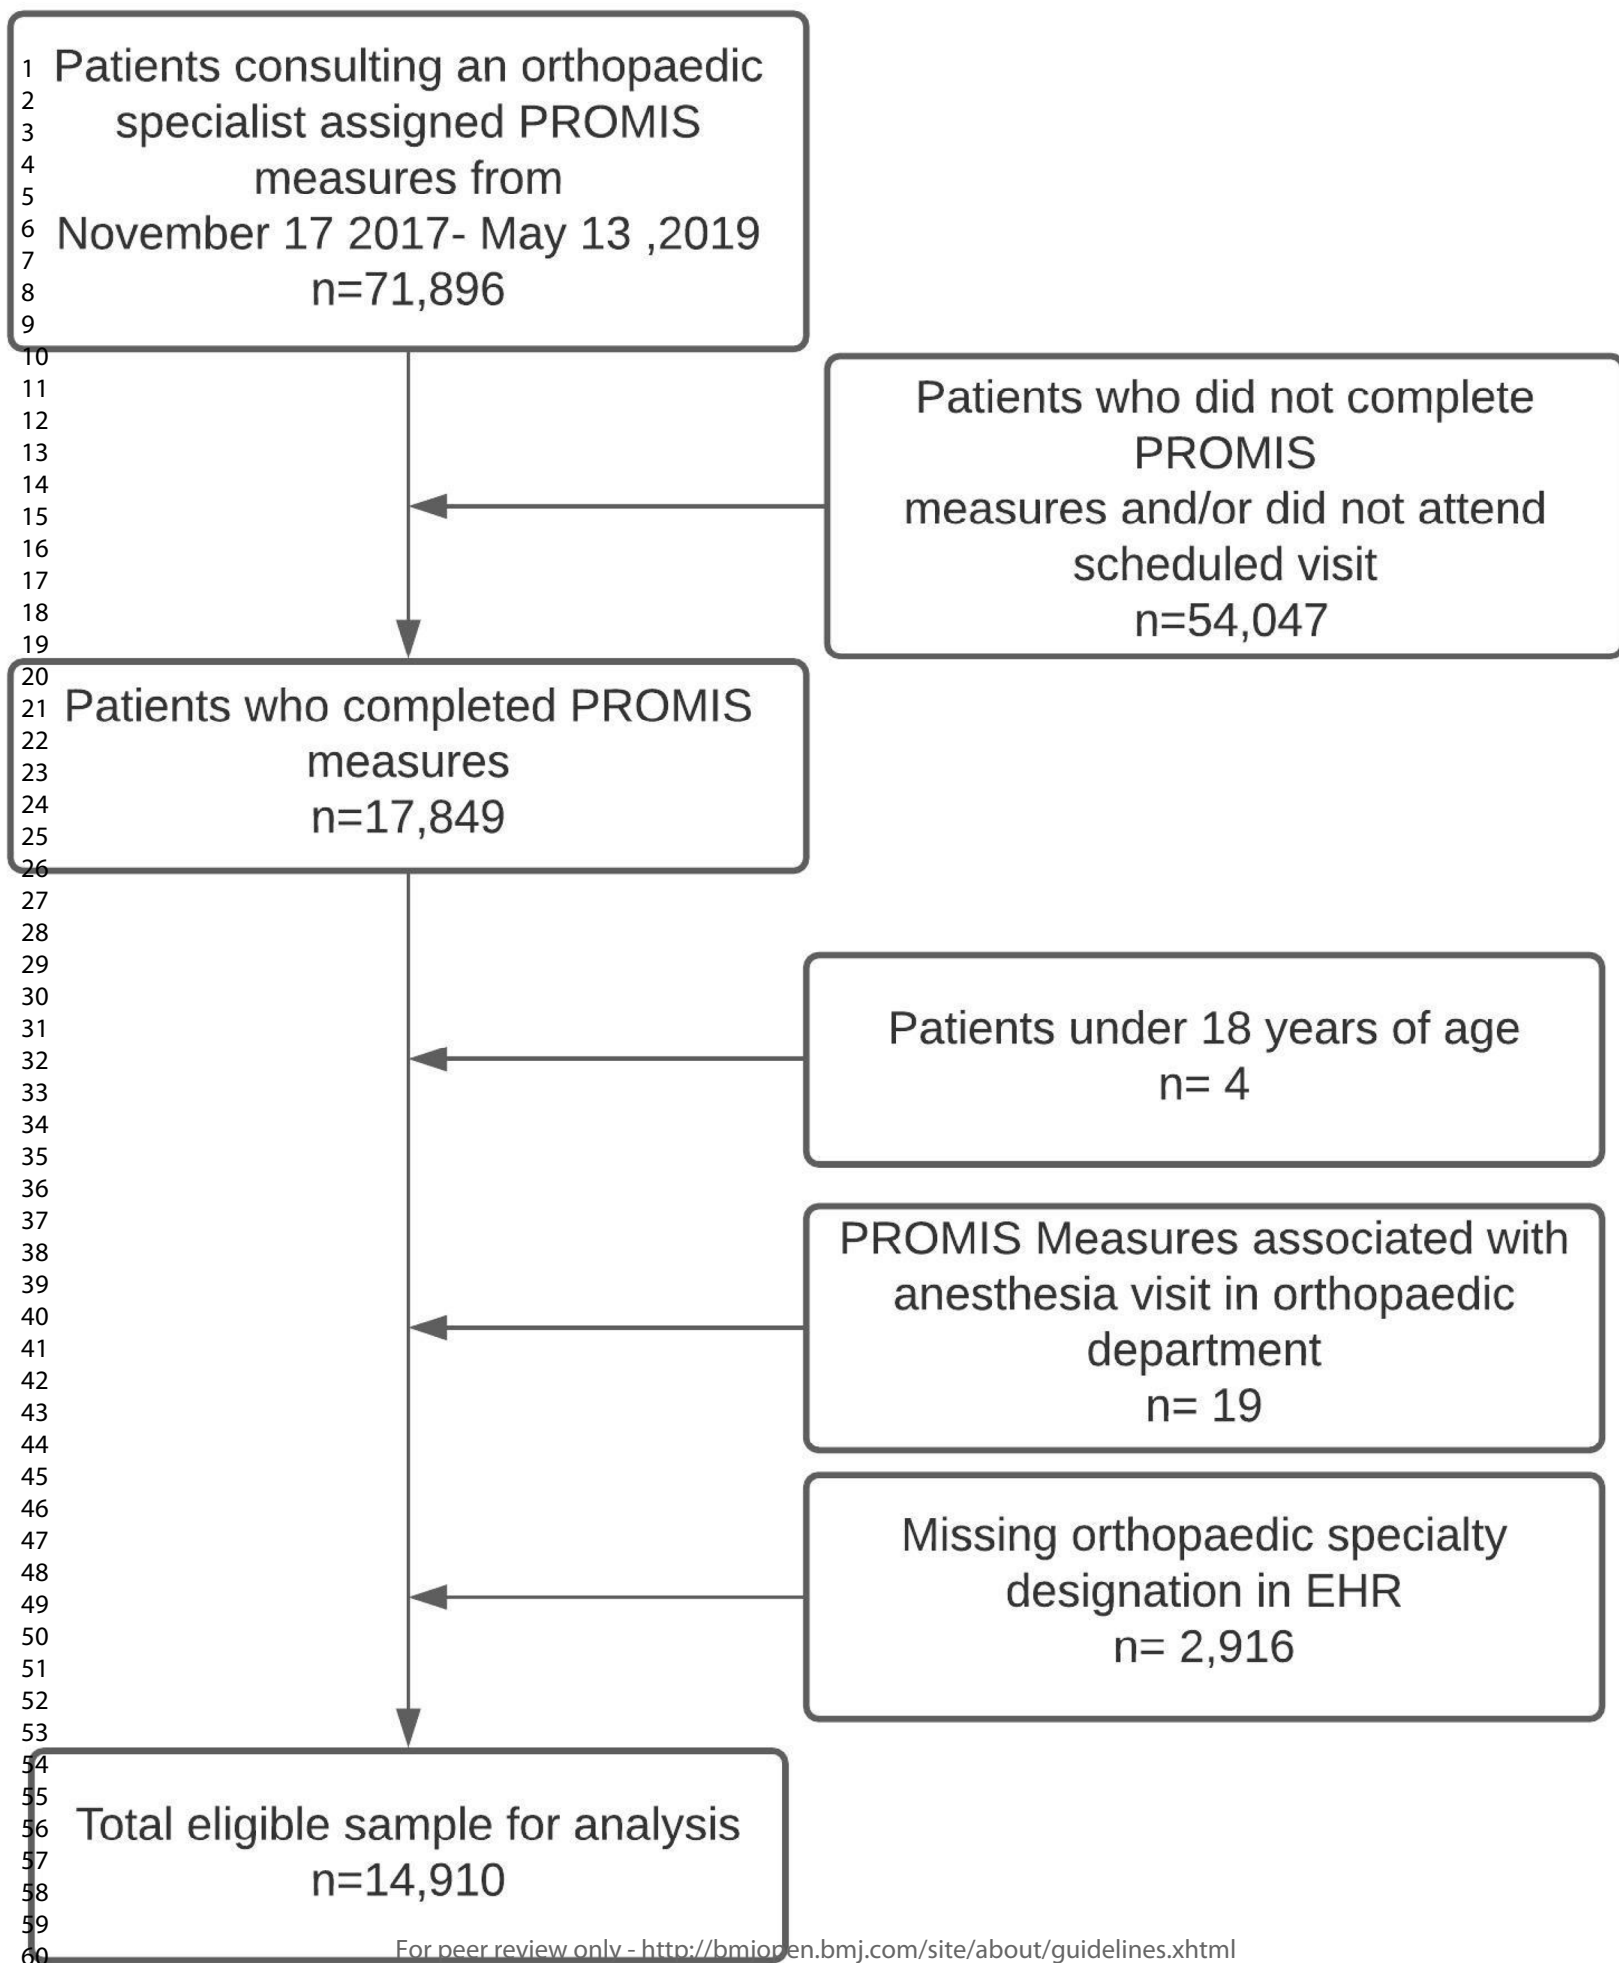

**STROBE 2007 (v4) Statement—Checklist of items that should be included in reports of *cohort studies***

| Section/Topic                | Item # | Recommendation                                                                                                                                                                       | Reported on page # |
|------------------------------|--------|--------------------------------------------------------------------------------------------------------------------------------------------------------------------------------------|--------------------|
| <b>Title and abstract</b>    | 1      | (a) Indicate the study's design with a commonly used term in the title or the abstract                                                                                               | 1                  |
|                              |        | (b) Provide in the abstract an informative and balanced summary of what was done and what was found                                                                                  | 2                  |
| <b>Introduction</b>          |        |                                                                                                                                                                                      |                    |
| Background/rationale         | 2      | Explain the scientific background and rationale for the investigation being reported                                                                                                 | 4                  |
| Objectives                   | 3      | State specific objectives, including any prespecified hypotheses                                                                                                                     | 4                  |
| <b>Methods</b>               |        |                                                                                                                                                                                      |                    |
| Study design                 | 4      | Present key elements of study design early in the paper                                                                                                                              | 5-6                |
| Setting                      | 5      | Describe the setting, locations, and relevant dates, including periods of recruitment, exposure, follow-up, and data collection                                                      | 5-6                |
| Participants                 | 6      | (a) Give the eligibility criteria, and the sources and methods of selection of participants. Describe methods of follow-up                                                           | 5-6                |
|                              |        | (b) For matched studies, give matching criteria and number of exposed and unexposed                                                                                                  | n/a                |
| Variables                    | 7      | Clearly define all outcomes, exposures, predictors, potential confounders, and effect modifiers. Give diagnostic criteria, if applicable                                             | 5-7                |
| Data sources/<br>measurement | 8*     | For each variable of interest, give sources of data and details of methods of assessment (measurement). Describe comparability of assessment methods if there is more than one group | 5-7                |
| Bias                         | 9      | Describe any efforts to address potential sources of bias                                                                                                                            | 5                  |
| Study size                   | 10     | Explain how the study size was arrived at                                                                                                                                            | 5                  |
| Quantitative variables       | 11     | Explain how quantitative variables were handled in the analyses. If applicable, describe which groupings were chosen and why                                                         | 5-7                |
| Statistical methods          | 12     | (a) Describe all statistical methods, including those used to control for confounding                                                                                                | 7                  |
|                              |        | (b) Describe any methods used to examine subgroups and interactions                                                                                                                  | 7                  |
|                              |        | (c) Explain how missing data were addressed                                                                                                                                          | 7                  |
|                              |        | (d) If applicable, explain how loss to follow-up was addressed                                                                                                                       | 7                  |
|                              |        | (e) Describe any sensitivity analyses                                                                                                                                                | 7                  |
| <b>Results</b>               |        |                                                                                                                                                                                      |                    |

|                          |     |                                                                                                                                                                                                                                                                                                                                                                                                               |                    |
|--------------------------|-----|---------------------------------------------------------------------------------------------------------------------------------------------------------------------------------------------------------------------------------------------------------------------------------------------------------------------------------------------------------------------------------------------------------------|--------------------|
| Participants             | 13* | (a) Report numbers of individuals at each stage of study—eg numbers potentially eligible, examined for eligibility, confirmed eligible, included in the study, completing follow-up, and analysed<br>(b) Give reasons for non-participation at each stage<br>(c) Consider use of a flow diagram                                                                                                               | 8<br>n/a<br>n/a    |
| Descriptive data         | 14* | (a) Give characteristics of study participants (eg demographic, clinical, social) and information on exposures and potential confounders<br>(b) Indicate number of participants with missing data for each variable of interest<br>(c) Summarise follow-up time (eg, average and total amount)                                                                                                                | 8<br>tables<br>n/a |
| Outcome data             | 15* | Report numbers of outcome events or summary measures over time                                                                                                                                                                                                                                                                                                                                                | 8                  |
| Main results             | 16  | (a) Give unadjusted estimates and, if applicable, confounder-adjusted estimates and their precision (eg, 95% confidence interval). Make clear which confounders were adjusted for and why they were included<br>(b) Report category boundaries when continuous variables were categorized<br>(c) If relevant, consider translating estimates of relative risk into absolute risk for a meaningful time period | 8-10<br>n/a<br>n/a |
| Other analyses           | 17  | Report other analyses done—eg analyses of subgroups and interactions, and sensitivity analyses                                                                                                                                                                                                                                                                                                                | n/a                |
| <b>Discussion</b>        |     |                                                                                                                                                                                                                                                                                                                                                                                                               |                    |
| Key results              | 18  | Summarise key results with reference to study objectives                                                                                                                                                                                                                                                                                                                                                      | 15                 |
| <b>Limitations</b>       |     |                                                                                                                                                                                                                                                                                                                                                                                                               |                    |
| Interpretation           | 20  | Give a cautious overall interpretation of results considering objectives, limitations, multiplicity of analyses, results from similar studies, and other relevant evidence                                                                                                                                                                                                                                    | 16                 |
| Generalisability         | 21  | Discuss the generalisability (external validity) of the study results                                                                                                                                                                                                                                                                                                                                         | 16                 |
| <b>Other information</b> |     |                                                                                                                                                                                                                                                                                                                                                                                                               |                    |
| Funding                  | 22  | Give the source of funding and the role of the funders for the present study and, if applicable, for the original study on which the present article is based                                                                                                                                                                                                                                                 | 17                 |

\*Give information separately for cases and controls in case-control studies and, if applicable, for exposed and unexposed groups in cohort and cross-sectional studies.

**Note:** An Explanation and Elaboration article discusses each checklist item and gives methodological background and published examples of transparent reporting. The STROBE checklist is best used in conjunction with this article (freely available on the Web sites of PLoS Medicine at <http://www.plosmedicine.org/>, Annals of Internal Medicine at <http://www.annals.org/>, and Epidemiology at <http://www.epidem.com/>). Information on the STROBE Initiative is available at [www.strobe-statement.org](http://www.strobe-statement.org).

# BMJ Open

## Use of Patient-Reported Outcome Measurement Information System® (PROMIS®) measures to characterize health status for patients seeking care from an orthopedic provider: A retrospective cohort study

|                                 |                                                                                                                                                                                                                                                                                                                                                                               |
|---------------------------------|-------------------------------------------------------------------------------------------------------------------------------------------------------------------------------------------------------------------------------------------------------------------------------------------------------------------------------------------------------------------------------|
| Journal:                        | <i>BMJ Open</i>                                                                                                                                                                                                                                                                                                                                                               |
| Manuscript ID                   | bmjopen-2020-047156.R2                                                                                                                                                                                                                                                                                                                                                        |
| Article Type:                   | Original research                                                                                                                                                                                                                                                                                                                                                             |
| Date Submitted by the Author:   | 02-Aug-2021                                                                                                                                                                                                                                                                                                                                                                   |
| Complete List of Authors:       | Horn, Maggie; Duke University School of Medicine, Reinke, Emily; Duke University School of Medicine Yan, Xiaofang; Duke Clinical Research Institute Luo, Sheng; Duke University, Bolognesi, Michael; Duke University, Reeve, Bryce B.; University of North Carolina at Chapel Hill Gillings School of Global Public Health, George, Steven; Duke Clinical Research Institute, |
| <b>Primary Subject Heading</b>: | Health services research                                                                                                                                                                                                                                                                                                                                                      |
| Secondary Subject Heading:      | Patient-centred medicine                                                                                                                                                                                                                                                                                                                                                      |
| Keywords:                       | Musculoskeletal disorders < ORTHOPAEDIC & TRAUMA SURGERY, Foot & ankle < ORTHOPAEDIC & TRAUMA SURGERY, Knee < ORTHOPAEDIC & TRAUMA SURGERY, Spine < ORTHOPAEDIC & TRAUMA SURGERY                                                                                                                                                                                              |
|                                 |                                                                                                                                                                                                                                                                                                                                                                               |

SCHOLARONE™  
Manuscripts



I, the Submitting Author has the right to grant and does grant on behalf of all authors of the Work (as defined in the below author licence), an exclusive licence and/or a non-exclusive licence for contributions from authors who are: i) UK Crown employees; ii) where BMJ has agreed a CC-BY licence shall apply, and/or iii) in accordance with the terms applicable for US Federal Government officers or employees acting as part of their official duties; on a worldwide, perpetual, irrevocable, royalty-free basis to BMJ Publishing Group Ltd ("BMJ") its licensees and where the relevant Journal is co-owned by BMJ to the co-owners of the Journal, to publish the Work in this journal and any other BMJ products and to exploit all rights, as set out in our [licence](#).

The Submitting Author accepts and understands that any supply made under these terms is made by BMJ to the Submitting Author unless you are acting as an employee on behalf of your employer or a postgraduate student of an affiliated institution which is paying any applicable article publishing charge ("APC") for Open Access articles. Where the Submitting Author wishes to make the Work available on an Open Access basis (and intends to pay the relevant APC), the terms of reuse of such Open Access shall be governed by a Creative Commons licence – details of these licences and which [Creative Commons](#) licence will apply to this Work are set out in our licence referred to above.

Other than as permitted in any relevant BMJ Author's Self Archiving Policies, I confirm this Work has not been accepted for publication elsewhere, is not being considered for publication elsewhere and does not duplicate material already published. I confirm all authors consent to publication of this Work and authorise the granting of this licence.

1  
2  
3 Title: Use of Patient-Reported Outcome Measurement Information System® (PROMIS®) measures to  
4  
5  
6 characterize health status for patients seeking care from an orthopedic provider: A retrospective cohort study  
7  
8  
9

10 Corresponding Author: Maggie E Horn DPT, MPH, PhD<sup>1,2</sup>

11  
12 Duke University, Box 10042, Durham, NC 27710, 919-684-1365, [maggie.horn@duke.edu](mailto:maggie.horn@duke.edu)

13  
14 Emily K. Reinke, PhD<sup>1</sup>

15  
16 Xiaofang Yang, PhD<sup>3</sup>

17  
18 Sheng Luo, PhD<sup>2,3</sup>

19  
20 Michael P Bolognesi, MD<sup>1</sup>

21  
22 Bryce B. Reeve, PhD<sup>2,3</sup>

23  
24 Steven Z George PT, PhD<sup>1,3</sup>

25  
26  
27 <sup>1</sup>Duke University, Department of Orthopaedic Surgery, Division of Physical Therapy, Durham, USA

28  
29 <sup>2</sup>Duke University, Department of Population Health Sciences, Durham, USA

30  
31 <sup>3</sup>Duke University, Duke Clinical Research Institute, Durham, USA

32  
33  
34  
35  
36 **Word count:** Abstract, 288; Body, 3514

## ABSTRACT

**Objectives:** Characterize the health status of patients newly consulting an orthopedic specialist across eight clinical subspecialties.

**Design:** Retrospective cohort

**Setting:** 18 orthopedic clinics, including eight subspecialties (14 ambulatory and four hospital-based) within an academic health system.

**Participants:** 14,910 patients consulting an orthopaedic specialist for a new patient consultation who completed baseline Patient-Reported Outcome Measurement Information System (PROMIS) measures associated with their appointment from November 17 2017 - May 13 2019. Patients were  $55.72 \pm 5.8$  years old, 61.3% female and 79.3% Caucasian, and were 13.4% Black or African American. Patients who did not complete PROMIS measures or canceled their appointment were excluded from the study.

**Primary Outcome:** PROMIS domains of physical function, pain interference, pain intensity, depression, anxiety, fatigue, sleep disturbance, and the ability to participate in social roles.

**Results:** Mean PROMIS scores for physical function was ( $38.1 \pm 9.2$ ), pain interference ( $58.9 \pm 8.1$ ), pain intensity ( $4.6 \pm 2.5$ ), depression ( $47.9 \pm 8.9$ ), anxiety ( $49.9 \pm 9.5$ ), fatigue ( $50.5 \pm 10.3$ ), sleep disturbance ( $51.1 \pm 9.8$ ), and ability to participate in social roles ( $49.1 \pm 10.3$ ). Across the clinical subspecialties, Neurosurgery, Spine, and Trauma patients were most profoundly affected across almost all domains, and patients consulting with a Hand specialist reported the least limitations or symptoms across domains. There was a moderate, negative correlation between pain interference and physical functioning ( $r = -0.59$ ) and low correlations

1  
2  
3 between pain interference with anxiety ( $r=0.36$ ), depression ( $r=0.39$ ) as well as physical function and anxiety  
4  
5 ( $r=-0.32$ ) and depression ( $r=-0.30$ ) and sleep ( $r=-0.31$ ).  
6

7  
8 **Conclusions:** We directly compared clinically meaningful PROMIS domains across eight orthopedic  
9  
10 subspecialties, which would not be possible with legacy measures alone. These results support PROMIS's  
11  
12 utility as a common metric to assess and compare patient health status across multiple orthopedic  
13  
14 subspecialties.  
15

## 16 17 18 **ARTICLE SUMMARY**

### 19 20 **Strengths and Limitations of this Study**

- 21  
22 • This study demonstrated the direct comparison of health status using PROMIS measures across eight  
23  
24 orthopedic clinical subspecialties, which was previously a challenge using legacy outcome measures.  
25
- 26  
27 • This study reported the association of eight clinically relevant PROMIS domains (six physical health  
28  
29 and two mental health domains) within an orthopedic cohort.
- 30  
31 • We evaluated PROMIS measures at baseline only as part of routine clinical assessment associated  
32  
33 with a new patient consultation with an orthopaedic specialist; no follow up data was analyzed in the  
34  
35 context of downstream healthcare utilization.
- 36  
37 • The findings' generalizability is limited by data collected within a private health system setting that may  
38  
39 not reflect other health systems' characteristics.  
40  
41  
42

43  
44 **Key Words:** Patient-reported outcome measures, orthopedics, health status, physical function, pain  
45  
46  
47  
48  
49  
50  
51  
52  
53  
54  
55  
56  
57  
58  
59  
60



## INTRODUCTION

To determine if a patient has achieved treatment success, it is insufficient to evaluate treatment results solely on medical history, physical findings, laboratory tests, or imaging findings alone.[1] While these are essential clinical indicators, they may not reflect what is most important to a patient. Patient-reported outcome measures (PROMs) are additional indicators that come directly from the patient. PROMs may address more important patient-centered outcomes about a patient's health status's physical, mental, and social aspects. Change in health status can be one of the measures of "success" from a patient's perspective after an orthopedic procedure.[2] PROMs are increasingly being used as part of the clinical encounter to guide treatment decisions and determine intervention effectiveness. [3]

"Legacy" patient-reported outcome measures (PROs) have been used for decades; however, they have many limitations.[4] To overcome the limitations of legacy measures the NIH developed a universally accepted set of PROMs. The NIH's Patient-Reported Outcomes Measurement Information System® (PROMIS®) covers a broad range of relevant domains and has strong evidence for its validity and reliability in a broad range of populations.[5–8] In orthopedics, the use of PROMIS measures has distinct advantages because it can be used across many clinical subspecialties as a common outcome metric. [8–10] This has the opportunity to allow for the evaluation of the efficacy of different interventions and inform quality improvement initiatives.[11]

Recently, there has been an increase in the adoption of PROMIS measures as the standard outcome measurement system in Orthopaedics to assess health status in orthopedic patients.[8] However, what is unknown about the use of PROMIS measures in orthopedics is how these measures differ across patients seeking care from different orthopedic clinical subspecialties. Moreover, there is limited data regarding the burden of disease in patients presenting to orthopedic clinics for initial care. Therefore, there are two goals of this study. First, we will characterize the health status of a cohort of patients completing PROMIS measures as part of the clinical encounter by comparing the physical health (6 domains) and mental health (2 domains) across eight different clinical subspecialty areas in a large academic medical center. Second, we will examine the correlation between the PROMIS domains in this cohort.

## METHODS

### Study Setting and Participants

Patients consulting an Orthopaedic specialist (surgeon or advanced practice provider- nurse practitioner or physician assistant) for a new patient consultation from November 17, 2017 - May 13, 2019 were considered. In this study, patients sought care within the Department of Orthopaedic surgery at a large academic, private medical center in Durham, NC. Inclusion criteria for the study were patients who completed assigned PROMIS measures associated with the visit type of new patient appointment. We excluded patients from the study who 1) were under 18 years of age at time of appointment, 2) completed assigned PROMIS measures but canceled or did not attend their scheduled appointments 3) who attended a visit with a provider that was not classified as an orthopaedic specialist or a provider that did not have a provider speciality designation within the EHR. The department includes 18 adult clinics (14 ambulatory and four hospital-based clinics). See Figure 1 for study eligibility. The department consists of eight subspecialties (Joint Reconstruction, Spine, Neurosurgery, Sports Medicine, Trauma, Orthopaedic Oncology, Foot and Ankle, and Hand) with over 100 Orthopaedic specialists. We extracted all data for this study directly from the electronic health record (EHR).

### Standardized Collection of PROMIS Measures

In December of 2017, the orthopedics department implemented a standardized collection of PROMIS measures across 18 clinics and eight clinical subspecialties. The administration of PROMIS measures was linked to new patient appointments and collected and scored passively within the EHR (Epic Systems) as part of the standard of care. Therefore, informed consent was not required for the completion of the PROMIS measures. This study was determined exempt by the Duke University Institutional Review Board (Pro00091740).

From November 2017- May 2019, we collected the short-form version of the following 8 PROMIS domains: physical function (7 items), pain interference (8 items), pain intensity (1 item), depression (8 items), anxiety (8 items), fatigue (8 items), sleep disturbance (8 items) and ability to participate in social roles (8 items). On December 20, 2018 our health system transitioned to administering the computer adaptive testing

1  
2  
3 (CAT) version of PROMIS domains instead of short form as the (CAT) instruments were then available within  
4  
5 our EHR. As part of the transition from short form to CAT, we reduced the set of PROMIS domains collected  
6  
7 to physical function, pain interference, depression, and sleep disturbance. This change was done in response  
8  
9 to feedback from clinicians regarding respondent burden with eight domains and perceived clinical utility of  
10  
11 information gained. Studies to date suggest CATs and SFs will produce very similar mean scores for a given  
12  
13 sample and demonstrate similar accuracy range with SFs are greater than 4 items such as in this study. [12–  
14] Therefore we combined these scores with the respective PROMIS short form scores for the analysis.

15  
16  
17 The PROMIS Physical Function domain is a patient's self-reported capability (rather than actual  
18  
19 performance) of physical activities. The physical function domain includes the functioning of one's upper  
20  
21 extremities (dexterity), lower extremities (walking or mobility), and central regions (neck, back), as well as  
22  
23 instrumental activities of daily living, such as running errands.[15] PROMIS Pain Interference measures the  
24  
25 consequences of pain on relevant aspects of one's life. The pain interference domain includes the extent to  
26  
27 which pain hinders engagement with social, cognitive, emotional, physical, and recreational activities.[16]  
28  
29 PROMIS pain intensity consists of one question, "How would you rate your pain on average? (0-10, 0=No pain  
30  
31 10=Worst imaginable)".[17] PROMIS emotional distress domains included depression and anxiety. Depression  
32  
33 measures negative mood (sadness, guilt), views of self (self-criticism, worthlessness), and social cognition  
34  
35 (loneliness, interpersonal alienation), as well as decreased positive affect and engagement (loss of interest,  
36  
37 meaning, and purpose).[18] Anxiety domain measures fear (fearfulness, panic), anxious misery (worry, dread),  
38  
39 hyperarousal (tension, nervousness, restlessness), and somatic symptoms related to arousal (racing heart,  
40  
41 dizziness). [19] The PROMIS Sleep Disturbance Perceptions measure sleep quality, sleep depth, and  
42  
43 restoration associated with sleep.[20] The PROMIS fatigue domain measures a range of symptoms, from mild  
44  
45 subjective feelings of tiredness to an overwhelming, debilitating, and sustained sense of exhaustion that likely  
46  
47 decreases one's ability to execute daily activities and function normally in a family or social roles.[21] The  
48  
49 PROMIS Ability to Participate in Social Roles and Activities measures one's perceived ability to perform one's  
50  
51 usual social roles and activities.[22,23]  
52  
53  
54  
55  
56  
57  
58  
59  
60

1  
2  
3  
4 Each PROMIS domain is scored separately on a T-score metric, where 50 is the mean and 10 is the  
5  
6 standard deviation of the calibration population. For all PROMIS domains (except sleep disturbance) included  
7  
8 in this study, the calibration population is the US general population. A higher score on a domain reflects more  
9  
10 of the measured concept (e.g., more Fatigue, more Physical Function). For example, a physical function score  
11  
12 of 60 indicates the sample's functioning is one standard deviation better than the average US general  
13  
14 population and lower score is less of the measured concept.[5] To increase the interpretability of findings,  
15  
16 PROMIS scores can then be categorized into the categories of "Within Normal Limits" indicating less than a  
17  
18 0.5 SD from the mean; "Mild" indicating a score 0.5 SD from mean; "Moderate" indicating 1.0 SD from the  
19  
20 mean; and "Severe" s indicating 2.0 standard deviations from the mean. These categories were developed by  
21  
22 evaluating the percentage of participants from large scale calibration testing that would then fit into each  
23  
24 category.[10,24]  
25  
26

### 130 **Patient Demographics**

27  
28  
29 Patient demographics recorded included patient age at the appointment, sex (male or female), race  
30  
31 (American Indian or Alaskan Native, Asian, Black or African American, Caucasian/White, Native Hawaiian or  
32  
33 Other Pacific Islander, Not Reported/Declined, Other and two or more races), ethnicity (Hispanic, Not  
34  
35 Hispanic/Latino, Not Reported/Declined), marital status (Divorced, Legally Separated, Life Partner, Married,  
36  
37 Single, unknown, widowed), geographical delineation (urban or rural) and primary and secondary insurance  
38  
39 type (Medicare, Medicaid, workers compensation, private).  
40  
41  
42

### 137 **Healthcare Process Variables**

43  
44  
45 In this sample, we collected information related to the new patient consultation, including; visit date,  
46  
47 clinic location and type (ambulatory vs. hospital-based), provider type (orthopedic physician or advanced  
48  
49 practice provider-nurse practitioner or physician assistant), and provider specialty (Joint Reconstruction, Spine,  
50  
51 Neurosurgery, Sports Medicine, Trauma, Orthopaedic Oncology, Foot and Ankle, and Hand).  
52  
53  
54

### 142 **Data Analysis**

1  
2  
3 We performed data analysis using R Statistical Software version R 4.0.2.[25]  
4  
5

6 This study's primary purpose was to characterize the health status of patients seeking care from eight  
7  
8 orthopedic subspecialties in the Department of Orthopaedic Surgery. We calculated descriptive statistics to  
9  
10 characterize the cohort. Means and standard deviations were reported for continuous variables, and  
11  
12 percentages were reported for categorical variables. Cohort characteristics were compared across clinical  
13  
14 subspecialties using chi-square analysis for categorical variables and 1-way analyses of variance for  
15  
16 continuous variables. We conducted ordinary least squares (OLS) linear regression and reported the mean  
17  
18 and 95% CI standard deviation for PROMIS domain scores across each specialty and for the entire cohort. We  
19  
20 included the variables of age, sex (male, female), race (collapsed into caucasian/white, black/african american,  
21  
22 and other), ethnicity (collapsed into non-hispanic, hispanic and not reported) and instrument type (short form or  
23  
24 CAT). These variables were included to control for the effects of differences in demographic factors and  
25  
26 questionnaire type across specialities when comparing mean PROMIS scores. We then calculated the  
27  
28 percentage of patients in the total cohort and each clinical subspecialty by severity categories for each  
29  
30 PROMIS domain: within normal limits, mild, moderate, and severe.[10,24,26] Lastly, we performed Pearson  
31  
32 correlation analyses to determine the association of the 8 PROMIS domains in the cohort. We defined the  
33  
34 magnitude of correlation as follows: low correlation - 0.10-0.39, moderate correlation - 0.40-0.69, high  
35  
36 correlation - 0.70- 0.89 and very high correlation - 0.90-1.00.[27]  
37  
38  
39

## 40 **Patient and Public Involvement**

41  
42

43 There was no involvement from patients or members of the public in the design, or conduct, or reporting, or  
44  
45 dissemination plans of this study.  
46  
47

## 48 **RESULTS**

49  
50

### 51 **Cohort Demographics**

52

53 Our study included 14,910 patients who consulted an Orthopaedic specialist for a new patient  
54  
55 consultation and completed baseline PROMIS measures. Of the entire sample, 61.3% (n=9,137) were female  
56  
57  
58  
59  
60

with a mean age of 55.72(15.8). Most of the sample reported being Caucasian (79.3% (n=11,831)) and 13.4% (n=2,001) were Black or African American. Our sample's self-reported ethnicity was 93.7% (n=13976) Not Hispanic/Latino and 1.9% (n=285) Hispanic. The majority of patients in the sample were married (64.1%, n=9,553). The geographic dispersion of the sample included 83.8% (n=12,488) residing in urban areas and 8.6% (n=1,276) residing in rural areas in North Carolina. The primary insurance of the sample was predominantly private (90.3%, n=13,465) followed by Medicare (7.3%, n=1,088) and Medicaid (2.1%, n=311).

The highest volume of patients in the sample sought care from a sports medicine provider (28.1%, n=4,197) or a spine provider (20.3%, n=3,028), followed by total joint (15.8%, n=2,353), foot and ankle (14.8%, n=2,208) and hand 12.5%, n=1,858). Orthopedic oncology, neurosurgery, and trauma had fewer than 10% of the total volume of patients in the sample. See **table 1**.

**Table 1. Sample Characteristics by Clinical Specialty**

| Provider specialty                        | Foot and ankle (n=2208) | Hand (n=1858) | Neurosurgery (n=1044) | Orthopaedic Oncology (n=124) | Spine (n=3028) | Sports medicine (n=4197) | Total Joint Arthroplasty (n=2353) | Trauma (n=98) | Total (n=14,910) | P value |
|-------------------------------------------|-------------------------|---------------|-----------------------|------------------------------|----------------|--------------------------|-----------------------------------|---------------|------------------|---------|
| Age                                       | 56.72(15.2)             | 54.63(15.9)   | 56.11(15.3)           | 55.18(15.5)                  | 57.2(15.3)     | 52.68(16.3)              | 59(14.9)                          | 56.18(19.9)   | 55.72(15.8)      | <<0.001 |
| Gender                                    |                         |               |                       |                              |                |                          |                                   |               |                  |         |
| Female                                    | 64.1%(1416)             | 61.3%(1138)   | 61.2%(639)            | 51.6%(64)                    | 60.0%(1818)    | 60.3%(2532)              | 62.39%(1468)                      | 63.3%(62)     | 61.3%(9137)      | 0.015   |
| Male                                      | 35.9%(792)              | 38.8(720)     | 38.8%(405)            | 48.4%(60)                    | 40.0%(1210)    | 39.7%(1665)              | 37.61%(885)                       | 36.7%(36)     | 38.7%(5773)      |         |
| Race                                      |                         |               |                       |                              |                |                          |                                   |               |                  |         |
| 2 or more races                           | 1.2%(26)                | 1.7%(31)      | 0.9%(9)               | 0%(0)                        | 1.4%(42)       | 1.3%(55)                 | 1.0%(24)                          | 3.1%(3)       | 1.3%(190)        | 0.01    |
| American Indian or Alaskan Native         | 0.2%(4)                 | 0.3%(6)       | 0.7%(7)               | 0.8%(1)                      | 0.4%(11)       | 0.3%(14)                 | 0.2%(4)                           | 1.0%(1)       | 0.3%(48)         |         |
| Asian                                     | 1.9%(42)                | 2.1%(54)      | 2.0%(21)              | 2.4%(3)                      | 2.2%(65)       | 2.8%(118)                | 1.3%(31)                          | 1.0%(1)       | 2.2%(335)        |         |
| Black or African American                 | 12.6%(278)              | 14.9%(278)    | 13.1%(137)            | 14.5%(18)                    | 12.6%(380)     | 13.4%(564)               | 14.2%(333)                        | 13.3%(13)     | 13.4%(2001)      |         |
| Caucasian/White                           | 80.6%(1780)             | 77.6%(1441)   | 80.9%(845)            | 79.0%(98)                    | 80.5%(2438)    | 78.0%(3274)              | 79.9%(1879)                       | 77.6%(76)     | 79.3%(11831)     |         |
| Native Hawaiian or Other Pacific Islander | 0.1%(1)                 | 0.1%(2)       | 0.1%(1)               | 0%(0)                        | 0.1%(2)        | 0.1%(4)                  | 0.1%(2)                           | 0%(0)         | 0.1%(12)         |         |

|                            |             |             |            |            |             |             |             |           |              |         |
|----------------------------|-------------|-------------|------------|------------|-------------|-------------|-------------|-----------|--------------|---------|
| Not Reported/ Declined     | 2.7%(60)    | 2.037       | 1.5%(16)   | 2.4%(3)    | 2.3%(68)    | 3.2%(132)   | 2.6%(60)    | 1.0%(1)   | 2.5%(377)    |         |
| Other                      | 0.8%(17)    | 0.5(9)      | 0.7%(8)    | 0.8%(1)    | 0.7%(22)    | 0.9%(36)    | 0.9%(20)    | 3.1%(3)   | 0.8%(116)    |         |
| <b>Ethnicity</b>           |             |             |            |            |             |             |             |           |              |         |
| Hispanic                   | 1.7%(37)    | 2.4%(45)    | 2.2%(23)   | 0.8%(1)    | 1.9%(57)    | 2.0%(85)    | 1.4%(32)    | 5.1%(5)   | 1.9%(285)    | 0.013   |
| Not Hispanic/Latino        | 94.4%(2085) | 93.3%(1733) | 94.8%(990) | 92.7%(115) | 94.0%(2846) | 92.9%(3898) | 94.3%(2218) | 92.9%(91) | 93.7%(13976) |         |
| Not Reported/ Declined     | 3.9%(86)    | 4.3%(80)    | 3.0%(31)   | 6.5%(8)    | 4.1%(125)   | 5.1%(214)   | 4.4%(103)   | 2.0%(2)   | 4.4%(649)    |         |
| <b>Marital Status</b>      |             |             |            |            |             |             |             |           |              |         |
| Divorced                   | 6.2%(137)   | 8.0%(149)   | 7.9%(82)   | 5.7%(7)    | 8.3%(251)   | 6.5%(273)   | 8.0%(187)   | 15.3%(15) | 7.4%(1101)   | <<0.001 |
| Legally Separated          | 0.9%(20)    | 1.1%(21)    | 1.0%(10)   | 0.8%(1)    | 1.1%(32)    | 1.1%(47)    | 0.4%(9)     | 1.0%(1)   | 0.9%(141)    |         |
| Life Partner               | 0.8%(17)    | 0.6%(11)    | 0.5%(5)    | 0%(0)      | 0.3%(10)    | 0.5%(19)    | 0.3%(6)     | 1.0%(1)   | 0.5%(69)     |         |
| Married                    | 65.4%(1445) | 61.9%(1150) | 66.6%(695) | 71.8%(89)  | 66.1%(2002) | 61.3%(2572) | 66.0%(1552) | 49.0%(48) | 64.1%(9553)  |         |
| Single                     | 18.4%(406)  | 19.8%(367)  | 16.6%(173) | 18.6%(23)  | 15.9%(482)  | 22.4%(939)  | 17.3%(408)  | 26.5%(26) | 18.9%(2824)  |         |
| Unknown                    | 3.6%(80)    | 4.1%(76)    | 2.6%(27)   | 0.8%(1)    | 3.1%(94)    | 4.7%(199)   | 2.6%(61)    | 0%(0)     | 3.6%(538)    |         |
| Widowed                    | 4.7%(103)   | 4.5%(84)    | 5.0%(52)   | 2.4%(3)    | 5.2%(157)   | 3.5%(148)   | 5.5%(130)   | 7.1%(7)   | 4.6%(684)    |         |
| <b>Geographic Location</b> |             |             |            |            |             |             |             |           |              |         |
| Rural, NC                  | 7.2%(158)   | 7.4%(138)   | 11.9%(124) | 12.1%(15)  | 9.7%(295)   | 7.3%(308)   | 9.4%(221)   | 17.4%(17) | 8.6%(1276)   | <<0.001 |
| Urban, NC                  | 82.4%(1820) | 87.2%(1621) | 77.1%(805) | 72.6%(90)  | 82.3%(2491) | 87.5%(3671) | 81.3%(1914) | 77.6%(76) | 83.8%(12488) |         |
| Other                      | 10.4%(230)  | 5.3%(99)    | 11.0%(115) | 15.3%(19)  | 8.0%(242)   | 5.2%(218)   | 9.3%(218)   | 5.1%(5)   | 7.7%(1146)   |         |
| <b>Primary Insurance</b>   |             |             |            |            |             |             |             |           |              |         |
| Medicare                   | 25.2%(556)  | 20.8%(387)  | 25.9%(270) | 23.4%(29)  | 27.2%(823)  | 17.6%(738)  | 28.9%(679)  | 32.7%(32) | 23.6%(3514)  | <<0.001 |
| Medicaid                   | 0.5%(10)    | 0.9%(17)    | 2.5%(26)   | 3.2%(4)    | 1.9%(58)    | 0.8%(33)    | 0.6%(15)    | 2.0%(2)   | 1.1%(165)    |         |
| Worker's Compensation      | 0.9%(20)    | 1.9%(35)    | 0.6%(6)    | 0.8%(1)    | 0.4%(12)    | 1%(42)      | 0.9%(21)    | 1.0%(1)   | 0.9%(138)    |         |
| Privately Insured          | 73.5%(1622) | 76.4%(1419) | 71.1%(742) | 72.6%(90)  | 70.5%(2135) | 80.6%(3384) | 69.6%(1638) | 64.3%(63) | 74.4%(11093) |         |
| <b>Secondary Insurance</b> |             |             |            |            |             |             |             |           |              |         |
| Medicare                   | 7.7%(169)   | 6.5%(121)   | 8.0%(83)   | 7.3%(9)    | 7.8%(235)   | 5.5%(229)   | 9.8%(231)   | 11.2%(11) | 7.3%(1088)   | <<0.001 |

|                                            |             |             |            |            |             |             |             |            |              |         |
|--------------------------------------------|-------------|-------------|------------|------------|-------------|-------------|-------------|------------|--------------|---------|
| Medicaid                                   | 1.3%(28)    | 1.5%(28)    | 3.7%(39)   | 3.2%(4)    | 3.0%(90)    | 1.6%(67)    | 2.1%(49)    | 6.1%(6)    | 2.1%(311)    |         |
| Worker's Compensation                      | 0.3%(6)     | 0.4%(8)     | 0.3%(3)    | 0%(0)      | 0.3%(8)     | 0.3%(13)    | 0.3%(7)     | 1.0%(1)    | 0.3%(46)     |         |
| Privately Insured                          | 90.8%(2005) | 91.6%(1701) | 88.0%(919) | 89.5%(111) | 89%(2695)   | 92.6%(3888) | 87.8%(2066) | 81.6%(80)  | 90.3%(13465) |         |
| <b>Questionnaire Type Completed</b>        |             |             |            |            |             |             |             |            |              |         |
| PROMIS Short Forms (8 domains)             | 74.7%(1650) | 70.8%(1316) | 71.7%(749) | 76.6%(95)  | 74.1%(2243) | 68.6%(2879) | 64.9%(1526) | 69.4%(68)  | 70.6%(10526) | <<0.001 |
| PROMIS CAT (4 domains)                     | 25.3(558)   | 29.2 (542)  | 28.3(295)  | 23.4%(29)  | 28.9 (785)  | 31.4 (1318) | 35.2(827)   | 30.6(30)   | 29.4 (4384)  |         |
| <b>Year PROMIS Questionnaire Completed</b> |             |             |            |            |             |             |             |            |              |         |
| 2017                                       | 2.9%(65)    | 2.5%(47)    | 3.5%(37)   | 6.5%(8)    | 4.9%(149)   | 3.3%(138)   | 3.3%(77)    | 3.1%(3)    | 3.5%(524)    | <<0.001 |
| 2018                                       | 66.2%(1462) | 63.2%(1175) | 63.1%(659) | 65.3%(81)  | 64.8%(1961) | 61.6%(2587) | 57.5%(1353) | 61.2%(60)  | 62.6%(9338)  |         |
| 2019                                       | 30.8%(681)  | 34.2%(636)  | 33.3%(348) | 28.2%(35)  | 30.3%(918)  | 35.1%(1472) | 39.2%(923)  | 35.71%(35) | 33.9%(5048)  |         |

\*mean(sd), %(n)

## PROMIS Scores

As presented in **table 2**, the adjusted mean scores for the PROMIS domains for the entire cohort were 38.14(38.00,38.28) for physical function, 58.84(58.71,58.98) for pain interference, 4.57(4.53,4.62) for pain intensity (on a 0 to 10 scale), 47.87(47.73,48.01) for depression, 49.85(49.67,50.03) for anxiety, 50.49(50.29,50.68) for fatigue, 51.08(50.92,51.24) for sleep disturbance and 49.06(48.86,49.25) for ability to participate in social roles. Higher pain interference and lower physical function were at least 0.5 and -1.0 standard deviations away, respectively, from the average US general population.

**Table 2. Summary of Scores for PROMIS Domains by Clinical Subspecialty**

|  | Foot and ankle | Hand | Neurosurgery | Orthopaedic Oncology | Spine | Sports medicine | Total Joint Arthroplasty | Trauma | Total Cohort | Sample Size |
|--|----------------|------|--------------|----------------------|-------|-----------------|--------------------------|--------|--------------|-------------|
|  |                |      |              |                      |       |                 |                          |        |              |             |



|                                        |                     |                     |                     | y                   |                     |                     | asty                |                     |                      |          |
|----------------------------------------|---------------------|---------------------|---------------------|---------------------|---------------------|---------------------|---------------------|---------------------|----------------------|----------|
| <b>Physical Health Domains</b>         |                     |                     |                     |                     |                     |                     |                     |                     |                      |          |
| Physical function                      | 39.82(39.46, 40.17) | 41.79(41.41, 42.18) | 35.13(34.61, 35.65) | 38.41(36.92, 39.89) | 35.71(35.41, 36.02) | 39.13(38.88, 39.39) | 36.61(36.27, 36.96) | 31.60(29.92, 33.28) | 38.14 (38.00, 38.28) | n=14,748 |
| Ability to participate in social roles | 50.53(50.05, 51.01) | 52.32(51.77, 52.86) | 44.30(43.59, 45.02) | 47.49(45.48, 49.49) | 46.30(45.89, 46.72) | 50.88(50.51, 51.25) | 47.93(47.42, 48.44) | 43.65(41.23, 46.08) | 49.06(48.86, 49.25)  | n=10,451 |
| Pain intensity                         | 4.07(3.96, 4.19)    | 3.71(3.58, 3.84)    | 5.48(5.31, 5.65)    | 4.02(3.54, 4.50)    | 5.35(5.25, 5.45)    | 4.26(4.17, 4.35)    | 4.90(4.78, 5.03)    | 4.79(4.20, 5.36)    | 4.57(4.53, 4.62)     | n=10,424 |
| Pain interference                      | 57.25(56.92, 57.58) | 55.65(55.29, 56.02) | 61.56(61.08, 62.04) | 57.47(56.08, 58.86) | 61.21(60.93, 61.49) | 58.01(57.77, 58.25) | 60.03(59.71, 60.35) | 60.97(59.37, 62.56) | 58.84(58.71, 58.98)  | n=14,474 |
| Fatigue                                | 49.13(48.65, 49.62) | 48.61(48.06, 49.15) | 54.94(54.22, 55.66) | 52.14(50.12, 54.15) | 53.22(52.81, 53.64) | 47.78(48.42, 49.15) | 50.31(49.80, 50.82) | 53.82(51.42, 56.21) | 50.49 (50.29, 50.68) | n=10,452 |
| Sleep disturbance                      | 49.20(48.80, 49.61) | 49.73(49.29, 50.17) | 53.85(53.26, 54.43) | 50.83(49.14, 52.51) | 53.08(52.73, 53.42) | 50.36(50.07, 50.66) | 51.26(50.87, 51.65) | 53.46(51.54, 55.39) | 51.08(50.92, 51.24)  | n=14,465 |
| <b>Mental Health Domains</b>           |                     |                     |                     |                     |                     |                     |                     |                     |                      |          |
| Anxiety                                | 48.61(48.16, 49.06) | 49.00(48.49, 49.51) | 52.65(51.99, 53.32) | 53.18(51.32, 55.04) | 51.69(51.30, 52.07) | 48.72(48.37, 49.06) | 49.64(49.17, 50.11) | 52.00(49.77, 54.24) | 49.85(49.67, 50.03)  | n=10,351 |
| Depression                             | 47.07(46.70, 47.44) | 47.27(46.87, 47.67) | 50.22(49.69, 50.76) | 49.22(47.68, 50.77) | 49.36(49.05, 49.68) | 46.87(46.61, 47.14) | 47.66(47.31, 48.02) | 50.85(49.06, 52.64) | 47.87 (47.73, 48.01) | n=14,391 |

\*mean(95% CI)

\*regression models adjusted for age, sex, race, ethnicity and questionnaire type

Table 3 provides more context to the range of observed health status scores by categorizing scores into degrees of severity: within normal limits, mild, moderate, and severe.[10,24,26] In this cohort, 24.9% of all patients reported their physical functioning within normal limits; the majority of patients (75%) reported mild, moderate, or severe limitations in physical functioning. There is a similar trend for pain interference, where 73% of patients reported mild, moderate, or severe limitations with pain interference. The majority of the cohort reported within normal limits for the ability to participate in social roles (63.5%), fatigue (68.0%), and sleep disturbance (66.0%). For the mental health domains (anxiety and depression), across the samples, most

1  
2  
300 patients reported normal limits for anxiety (69.6%) and depression (76.8%). Few patients reported severe  
4  
501 symptoms of anxiety (1.7%) and depression (1.1%).  
6  
7  
202  
8  
9  
10  
11  
12  
13  
14  
15  
16  
17  
18  
19  
20  
21  
22  
23  
24  
25  
26  
27  
28  
29  
30  
31  
32  
33  
34  
35  
36  
37  
38  
39  
40  
41  
42  
43  
44  
45  
46  
47  
48  
49  
50  
51  
52  
53  
54  
55  
56  
57  
58  
59  
60

For peer review only

Table 3: PROMIS Severity Categories by Clinical Subspecialty

|                                               | Foot and ankle | Hand  | Neurosurgery | Orthopaedic Oncology | Spine | Sports medicine | Total Joint Arthroplasty | Trauma | Total |
|-----------------------------------------------|----------------|-------|--------------|----------------------|-------|-----------------|--------------------------|--------|-------|
| <b>Physical Health Domains</b>                |                |       |              |                      |       |                 |                          |        |       |
| <b>Physical function</b>                      |                |       |              |                      |       |                 |                          |        |       |
| Within Normal limits                          | 29.6%          | 40.5% | 16.2%        | 32.3%                | 15.7% | 29.1%           | 16.6%                    | 11.3%  | 24.9% |
| Mild                                          | 22.9%          | 20.7% | 13.1%        | 11.3%                | 15.0% | 22.1%           | 20.0%                    | 8.3%   | 19.5% |
| Moderate                                      | 30.7%          | 26.4% | 38.9%        | 33.1%                | 40.5% | 33.3%           | 40.2%                    | 29.9%  | 35.0% |
| Severe                                        | 16.7%          | 12.5% | 31.8%        | 23.4%                | 28.8% | 15.4%           | 23.2%                    | 50.5%  | 20.6% |
| <b>Ability to participate in social roles</b> |                |       |              |                      |       |                 |                          |        |       |
| Within Normal limits                          | 67.3%          | 74.3% | 42.2%        | 51.6%                | 52.8% | 72.8%           | 60.6%                    | 44.6%  | 63.5% |
| Mild                                          | 18.4%          | 13.9% | 23.4%        | 24.2%                | 21.3% | 14.2%           | 18.9%                    | 15.4%  | 17.8% |
| Moderate                                      | 11.5%          | 9.6%  | 24.9%        | 20.0%                | 19.5% | 10.3%           | 16.1%                    | 24.6%  | 14.4% |
| Severe                                        | 2.9%           | 2.2%  | 9.5%         | 4.2%                 | 6.4%  | 2.7%            | 4.4%                     | 15.4%  | 4.3%  |
| <b>Pain interference</b>                      |                |       |              |                      |       |                 |                          |        |       |
| Within Normal limits                          | 33.8%          | 43.7% | 16.3%        | 33.1%                | 16.7% | 29.8%           | 20.3%                    | 21.7%  | 27.0% |
| Mild                                          | 23.6%          | 24.3% | 16.7%        | 16.5%                | 21.4% | 28.4%           | 24.3%                    | 13.0%  | 24.1% |
| Moderate                                      | 39.4%          | 28.8% | 59.7%        | 46.3%                | 55.8% | 38.0%           | 49.0%                    | 55.4%  | 44.1% |
| Severe                                        | 3.2%           | 3.3%  | 7.4%         | 4.1%                 | 6.2%  | 3.7%            | 6.5%                     | 9.8%   | 4.8%  |
| <b>Fatigue</b>                                |                |       |              |                      |       |                 |                          |        |       |
| Within Normal limits                          | 73.4%          | 73.9% | 50.7%        | 63.2%                | 57.2% | 74.4%           | 70.6%                    | 55.2%  | 68.0% |
| Mild                                          | 12.3%          | 11.3% | 17.7%        | 13.7%                | 17.1% | 12.3%           | 13.8%                    | 17.9%  | 13.9% |
| Moderate                                      | 12.0%          | 12.2% | 24.6%        | 20.0%                | 21.8% | 11.0%           | 13.2%                    | 20.9%  | 15.1% |
| Severe                                        | 2.3%           | 2.7%  | 7.0%         | 3.2%                 | 3.9%  | 2.3%            | 2.4%                     | 6.0%   | 3.1%  |
| <b>Sleep disturbance</b>                      |                |       |              |                      |       |                 |                          |        |       |
| Within Normal limits                          | 74.3%          | 71.5% | 54.3%        | 67.2%                | 58.0% | 69.0%           | 64.8%                    | 55.3%  | 66.0% |

|                              |       |       |       |       |       |       |       |       |       |
|------------------------------|-------|-------|-------|-------|-------|-------|-------|-------|-------|
| Mild                         | 13.7% | 14.1% | 17.5% | 18.0% | 18.1% | 14.4% | 16.0% | 13.8% | 15.5% |
| Moderate                     | 10.5% | 11.7% | 22.3% | 11.5% | 19.3% | 13.7% | 16.1% | 23.4% | 15.1% |
| Severe                       | 1.6%  | 2.7%  | 5.9%  | 3.3%  | 4.7%  | 2.9%  | 3.0%  | 7.5%  | 3.3%  |
| <b>Mental Health Domains</b> |       |       |       |       |       |       |       |       |       |
| <b>Anxiety</b>               |       |       |       |       |       |       |       |       |       |
| Within Normal limits         | 74.6% | 71.6% | 59.7% | 55.8% | 62.0% | 73.4% | 72.5% | 60.6% | 69.6% |
| Mild                         | 14.0% | 14.8% | 16.2% | 22.1% | 17.2% | 14.7% | 15.2% | 16.7% | 15.4% |
| Moderate                     | 10.5% | 11.4% | 20.2% | 19.0% | 18.9% | 10.9% | 10.7% | 19.7% | 13.4% |
| Severe                       | 0.9%  | 2.1%  | 3.9%  | 3.2%  | 1.9%  | 1.1%  | 1.6%  | 3.0%  | 1.7%  |
| <b>Depression</b>            |       |       |       |       |       |       |       |       |       |
| Within Normal limits         | 80.7% | 78.3% | 66.5% | 71.9% | 71.5% | 79.9% | 78.6% | 65.6% | 76.8% |
| Mild                         | 12.1% | 12.0% | 15.9% | 14.9% | 14.9% | 12.2% | 12.5% | 20.0% | 13.1% |
| Moderate                     | 6.5%  | 8.2%  | 15.2% | 12.4% | 12.3% | 7.3%  | 8.0%  | 12.2% | 9.1%  |
| Severe                       | 0.6%  | 1.5%  | 2.5%  | 0.8%  | 1.4%  | 0.7%  | 1.0%  | 2.2%  | 1.1%  |

In **table 4**, we examine the correlation of unadjusted PROMIS domains in the cohort. As expected, we found high correlations between depression and anxiety ( $r=0.76$ ) and pain interference and pain intensity ( $r=0.75$ ). Additionally, we found moderate correlations between commonly administered PROMIS domains in Orthopaedics - physical function and pain interference ( $r=-0.60$ ) and physical function and pain intensity ( $r=0.52$ ). There was a low correlation found between anxiety and pain intensity ( $r=0.30$ ), anxiety, and pain interference ( $r=0.36$ ), anxiety, and physical function ( $r=-0.32$ ). Similar trends were found with depression where low correlations between depression and pain intensity ( $r=0.29$ ), depression, and pain interference ( $r=0.39$ ), depression, and physical function ( $r=-0.30$ ).

**Table 4: Correlation of PROMIS Domains**

|                   | Participation | Anxiety | Depression | Fatigue | Pain Intensity | Pain Interference | Physical Function | Sleep Disturbance |
|-------------------|---------------|---------|------------|---------|----------------|-------------------|-------------------|-------------------|
| Participation     | -             | -0.48   | -0.51      | -0.66   | -0.52          | -0.69             | 0.67              | -0.45             |
| Anxiety           | -0.48         | -       | 0.76       | 0.58    | 0.30           | 0.36              | -0.32             | 0.44              |
| Depression        | -0.51         | 0.76    | -          | 0.58    | 0.29           | 0.39              | -0.30             | 0.43              |
| Fatigue           | -0.66         | 0.58    | 0.58       | -       | 0.42           | 0.52              | -0.48             | 0.54              |
| Pain Intensity    | -0.52         | 0.30    | 0.29       | 0.42    | -              | 0.75              | -0.52             | 0.39              |
| Pain Interference | -0.69         | 0.36    | 0.39       | 0.52    | 0.75           | -                 | -0.60             | 0.45              |

|                   |       |       |       |       |       |       |       |       |
|-------------------|-------|-------|-------|-------|-------|-------|-------|-------|
| Physical Function | 0.67  | -0.32 | -0.30 | -0.48 | -0.52 | -0.60 | -     | -0.31 |
| Sleep Disturbance | -0.45 | 0.44  | 0.43  | 0.54  | 0.39  | 0.45  | -0.31 | -     |

\*all correlations were statistically significant  $P < 0.001$

## PROMIS Scores by Major Clinical Specialties

### Foot and Ankle

Patients consulting with a foot and ankle orthopedic specialist scored less than 0.5 SD from the mean for all domains except for pain interference, where patients reported a mean score of 57.2(8.6). When looking at the clinically interpretable categories for physical function, 30.7% of patients reported moderate limitations and 16.7% severe limitations. For pain interference, 39.4% reported moderate and limitations, and 3.2% reported severe limitations.

### Hand

Patients who consulted with a hand orthopedic specialist reported scores less than 0.5 SD from the mean for all domains except pain interference and physical function. Patients reported a mean score of 55.7(8.8) and 41.85(9.5), respectively. For physical function, 26.4% of patients reported moderate limitations, and 12.5% reported severe limitations.

### Neurosurgery and Spine

Patients either consulting with a neurosurgeon or a spine orthopedic specialist reported between 1- 1.5 standard deviations from the US mean for pain interference and physical functioning. Neurosurgery patients reported higher levels of pain interference (61.53(8.1)) compared to spine patients (57.23(9.7)) and also reported more limitations in physical functioning (35.0(9.0)) as compared to spine patients (38.35(10.5)). For physical function, a majority of neurosurgery patients reported moderate (38.9%) and severe (31.8%) limitations, and this was similar in spine patients (moderate- 40.5%, severe 28.8%). Pain interference, most neurosurgery (59.7%) and Spine patients (55.8%) reported moderate limitations, and a small percentage of neurosurgery (7.4%) and spine patients (6.2%) reported severe limitations.

### Sports Medicine

1  
2  
3  
4 Patients seeking care from a sports medicine specialist reported less than 0.5 SD from the US mean in  
5  
6 all domains except physical function (39.51(8.8)) and pain interference (58.0(7.6)) where their scores were  
7  
8 between 0.5-1.0 SD from the US mean. 33.3% of patients reported moderate limitations in physical function,  
9  
10 and 15.4% reported severe limitations. For pain interference, 38.0% of patients reported moderate limitations,  
11  
12 and 3.7% reported severe limitations.

### 13 14 15 Total Joint Arthroplasty

16  
17 Patients consulting a Total Joint Arthroplasty Orthopaedic Surgeon reported less than 0.5 SD from the  
18  
19 US mean in all domains except physical functioning (36.58(8.5)) and pain interference (60.21(8.4)). Most  
20  
21 patients reported moderate limitations in physical functioning (40.2%) and pain interference (48.9%), and  
22  
23 23.2% reported severe limitations in physical function, and only a small percentage reported severe limitations  
24  
25 for pain interference (6.5%).

26  
27 We did not report on Trauma or Orthopaedic Oncology due to low sample sizes in each of these  
28  
29 subspecialties.

## 30 31 32 DISCUSSION

33  
34 The goal of PROMIS was to create a measurement system that could standardize of PROs across  
35  
36 chronic conditions to better enable comparisons across different disease conditions.[14] To this end, we  
37  
38 described approximately 15,000 orthopedic patients across eight different clinical subspecialties who  
39  
40 completed PROMIS measures associated with a new patient consultation with an orthopedic specialist. We  
41  
42 found across an orthopaedic department at an academic medical center, that most patients reported scores  
43  
44 within 0.5 SD from the US mean on all domains except pain interference and physical functioning; where they  
45  
46 reported approximately 1.0 SD US mean on pain interference and physical functioning . These findings are  
47  
48 expected, where the primary drivers of seeking care for orthopedic issues are decreased physical functioning  
49  
50 and increased interference with activities due to pain.[28][29] When further examining the difference of  
51  
52 PROMIS scores between the clinical subspecialties for the physical health domains, we found that patients  
53  
54 seeking care from hand specialists reported less overall physical health impairments. However, we primarily  
55  
56 attribute this finding to administering the generic PROMIS physical function measure rather than the upper  
57  
58  
59  
60

1  
2  
3  
4 265 extremity physical function PROMIS measure, which is more specific to upper extremity conditions and may  
5  
6 266 better reflect limitations in this group.[30] Patients seeking care from a Neurosurgery, Spine, or a Trauma  
7  
8 267 specialist reported significant physical health impairments. When examining PROMIS mental health domains,  
9  
10 268 most patients across clinical subspecialties reported that their anxiety and depression symptoms were within  
11  
12 269 normal limits; however, up to 24.1% reported moderate or severe anxiety and up to 17.6% reported moderate  
13  
14 270 or severe depressive symptoms. Following a similar trend as the specialties across the PROMIS physical  
15  
16 271 health domains, patients seeking care from a Neurosurgery, Spine, or Trauma specialist reported the highest  
17  
18 272 anxiety and depression symptoms. This relationship is consistent with literature supporting patients with spine  
19  
20 273 conditions, and orthopedic trauma have higher anxiety levels than other orthopedic conditions.[31,32]

21  
22 274 Majority of patients seeking care in orthopaedics across clinical subspecialties do so because of  
23  
24 275 limitations in physical function and pain.[33–35] Measurement of these constructs can be done using PROMs.  
25  
26 276 Many legacy measures commonly used in orthopaedics measure more than one construct. This makes it  
27  
28 277 difficult to elucidate limitations or symptom contributions from a specific construct on a patient's perception of  
29  
30 278 their health status. For example, a patient seeking care for knee osteoarthritis may report more limitations in  
31  
32 279 physical functioning rather than pain. Using traditional, concise legacy measures such as Knee Injury and  
33  
34 280 Osteoarthritis Outcome Score Junior (KOOS Jr) [36] to evaluate stiffness, pain, function and activities of daily  
35  
36 281 living using 7 items would be challenging to isolate the relative limitations in physical functioning compared to  
37  
38 282 the other constructs included in the KOOS Jr. Whereas, PROMIS PF can be administered to capture this  
39  
40 283 construct separately and concisely, giving a valid estimate of a patient's perception of their physical function.  
41  
42 284 PROMIS PF and has been shown to be equal or superior in regard to floor and ceiling effects when compared  
43  
44 285 with previously established legacy PROM in several patient populations including trauma, shoulder, elbow,  
45  
46 286 hand, spine, and knee; making this measure applicable across patient populations and range of severity of  
47  
48 287 symptoms. [37] However a noted limitation is, to date, not all PROMIS measures have been evaluated for floor  
49  
50 288 and ceiling effects across multiple populations or found to be as responsive as PROMIS PF for Orthopaedic  
51  
52 289 patients. In particular, PROMIS measures that capture emotional distress and psychosocial illness impact have  
53  
54 290 not been extensively researched for wide-spread use in Orthopaedics [31].  
55  
56  
57  
58  
59  
60

## Strengths and Limitations

Our study has noted strengths. First, our study is novel in that we reported eight PROMIS domains across eight different orthopedic clinical subspecialties. The use of PROMIS measures in clinical practice and research has been increasing in prevalence in spine, total joint, sports medicine, upper extremity disorders, trauma, and lower extremity disorders.[38] In a systematic review on the uptake of PROMIS measures in Orthopaedics, they found that studies typically report around three PROMIS domains.[38] Our study is the first that we are aware of to report and directly compare differences in these eight health domains across orthopaedic clinical subspecialties, providing baseline for PROMIS scores in orthopaedic. The direct comparisons reported in this paper would not be possible if using region-specific measures common to orthopedic practice and research. By implementing PROMIS measures as a standard set of outcome measures, we can draw inferences about differences in patient-reported health status across orthopedic populations that are typically not compared. Second, our study reported a clinical interpretation of PROMIS scores addressing the reported barrier to PROMIS use uptake.[8,39] Providing a clinical interpretation is vital because often there is a disconnect between mean PROMIS scores (i.e., physical functioning score- 38.2) and how to interpret this information (moderate limitations in physical functioning).[39]

Our study is not without limitations. First, this was a cross-sectional cohort analysis, so we did not report PROMIS measures beyond baseline. Therefore, we cannot identify predictors of clinical outcomes or compare the change in PROMIS scores across subspecialties over time or downstream utilization of Orthopaedic procedures or rehabilitation services associated with baseline scores. Second, our findings may have limited generalizability. For example, the setting was a private hospital. It may not capture the broad diversity of non-white individuals in the area (79.3% of individuals reported being Caucasian). Our instruments were only available in English, limiting data collection on non-English speaking patients. Moreover, in some clinical subspecialties reported (i.e., trauma and orthopedic oncology), small sample sizes potentially limit generalizability of these findings. Lastly, we did not compare PROMIS upper extremity physical function or legacy measures to our PROMIS measures as part of this study. Therefore we cannot make direct



1  
2  
3  
4  
5  
6  
7  
8  
9  
10  
11  
12  
13  
14  
15  
16  
17  
18  
19  
20  
21  
22  
23  
24  
25  
26  
27  
28  
29  
30  
31  
32  
33  
34  
35  
36  
37  
38  
39  
40  
41  
42  
43  
44  
45  
46  
47  
48  
49  
50  
51  
52  
53  
54  
55  
56  
57  
58  
59  
60

comparisons of the performance of the eight reported PROMIS domains in this study to legacy or PROMIS upper extremity. However, the relationship between legacy measures in orthopedics and PROMIS measures is well documented in the literature. [40]

Our study's findings are consistent with other literature regarding orthopedic populations' physical and mental health status. [41] In comparison to a study by Perruccio et al. (2013) using the SF-36 as the outcome measure to physical and mental health in patients seeking care for musculoskeletal disorders, we found similar results where patients with spine disorders reported the most impairments in the cohort. [41] Additionally, consistent with our results, they found hand upper extremity/hand patients were the healthiest, and total joint arthroplasty patients demonstrated low levels of physical functioning. Our study's unexpected finding low levels of sleep disturbance, fatigue, and depression reported across clinical subspecialties. Sleep disruption and pain frequently co-occur; both are uniquely linked with depressed mood [42–45] and various forms of functional disability [46–48]. Depression appears to play a substantial role in the sleep-pain linkage, particularly where the pain is severe. [49] However, in our study, we did not find this relationship between pain, physical function, sleep disturbance, and depression in the cohort, despite the research supporting these relationships. [49]

### Conclusions

Reporting patients' health status consulting an Orthopaedic provider using a standard set of outcome measures across various clinical subspecialties has numerous clinical care and research implications. Understanding the health status and clinical examination measures may improve patient and provider communication during the clinical encounter [50] and be used as part of the prognostic evaluation. [51] Moreover, this study can provide a context for informing bundled care or value-based care models. Classifying heterogeneous orthopedic patients' baseline status on a standard metric could better inform the effectiveness and cost of treatment pathways.[52] Lastly, reporting PROMIS scores has allowed the direct comparison of eight meaningful constructs across orthopedic subspecialties. This comparison would not be possible with legacy measures, which is a noted strength of PROMIS measures. These comparisons allow unique insights to be made for orthopedic departments and align clinical and research data collection with value-based care

1  
2  
3 initiatives outside of orthopedic departments. Clinicians and administrators can use this information to improve  
4  
5 the delivery and the efficiency of care, improve and inform referral practices, and inform subspecialty-specific  
6  
7 education to improve patient outcomes from orthopedic care.  
8  
9

10  
11  
12 **Acknowledgments:** We would like to acknowledge the Comprehensive Outcomes in Orthopaedics and  
13  
14 Rehabilitation Data System (COORDS) group for supporting the infrastructure for data collection. We would  
15  
16 also like to acknowledge Jennifer Gagnon for her contribution to data acquisition.  
17

18  
19 **Competing Interests:** none declared

20  
21 **Funding:** his research received no specific grant from any funding agency in public, commercial or not-for-  
22  
23 profit sectors

24  
25 **Ethics Statement:** This study was determined exempt by the Duke University Institutional Review Board  
26  
27 (Pro00091740).  
28

29  
30 **Author Contributions:** Maggie Horn contributed to the work's conception, design of the study, data  
31  
32 acquisition, and writing of the manuscript. Steven George contributed to the conception of the work, design of  
33  
34 the manuscript's study, and writing. Emily Reinke contributed to the conception of the work, design of the  
35  
36 study, data acquisition, and writing the manuscript. Xiaofang Yan and Sheng Luo contributed to the study's  
37  
38 design and statistical analysis. Michael Bolognesi contributed to the design of the manuscript's study and  
39  
40 writing. Bryce Reeve contributed to the design of the manuscript's study and writing. All authors had final  
41  
42 approval of the manuscript.  
43

44  
45 **Data Availability:** Data are not available in accordance with protections provided by the HIPAA privacy  
46  
47 information policy.  
48  
49  
50  
51  
52  
53  
54  
55  
56  
57  
58  
59  
60

1  
2  
3  
4  
5  
6  
7  
8  
9  
10  
11  
12  
13  
14  
15  
16  
17  
18  
19  
20  
21  
22  
23  
24  
25  
26  
27  
28  
29  
30  
31  
32  
33  
34  
35  
36  
37  
38  
39  
40  
41  
42  
43  
44  
45  
46  
47  
48  
49  
50  
51  
52  
53  
54  
55  
56  
57  
58  
59  
60

FIGURE 1: Flow diagram for cohort selection.

For peer review only

## REFERENCES

- 1 Jones RS, Stukenborg GJ. Patient-Reported Outcomes Measurement Information System (PROMIS) Use in Surgical Care: A Scoping Study. *J Am Coll Surg* 2017;**224**:245–54.e1. doi:10.1016/j.jamcollsurg.2016.11.015
- 2 Nelson EC, Eftimovska E, Lind C, *et al*. Patient reported outcome measures in practice. *BMJ* 2015;**350**:g7818. doi:10.1136/bmj.g7818
- 3 Hung M, Stuart AR, Higgins TF, *et al*. Computerized Adaptive Testing Using the PROMIS Physical Function Item Bank Reduces Test Burden With Less Ceiling Effects Compared With the Short Musculoskeletal Function Assessment in Orthopaedic Trauma Patients. *Journal of Orthopaedic Trauma*. 2014;**28**:439–43. doi:10.1097/bot.0000000000000059
- 4 Sikorskii A, Victorson D, O'Connor P, *et al*. PROMIS and legacy measures compared in a supportive care intervention for breast cancer patients and caregivers: Experience from a randomized trial. *Psychooncology* 2018;**27**:2265–73. doi:10.1002/pon.4825
- 5 PROMIS. <https://www.healthmeasures.net/score-and-interpret/interpret-scores/promis> (accessed 9 Jul 2020).
- 6 Kortlever JTP, Leyton-Mange A, Keulen MHF, *et al*. PROMIS Physical Function Correlates with KOOS, JR in Patients with Knee Pain. *J Knee Surg* 2020;**33**:903–11. doi:10.1055/s-0039-1688780
- 7 Moore MLG, Kortlever JTP, Keulen MHF, *et al*. PROMIS PF correlates with HOOS, JR in patients with hip pain. *J Orthop* 2020;**21**:58–61. doi:10.1016/j.jor.2020.01.048
- 8 Brodke DJ, Saltzman CL, Brodke DS. PROMIS for Orthopaedic Outcomes Measurement. *J Am Acad Orthop Surg* 2016;**24**:744–9. doi:10.5435/JAAOS-D-15-00404
- 9 Jildeh TR, Lizzio VA, Meta F, *et al*. The Correlation Between PROMIS Pain Interference and VAS Pain in Ambulatory Orthopedic Patients. *Orthopedics* 2018;**41**:e813–9. doi:10.3928/01477447-20180912-06
- 10 Cella D, Riley W, Stone A, *et al*. The Patient-Reported Outcomes Measurement Information System (PROMIS) developed and tested its first wave of adult self-reported health outcome item banks: 2005–2008. *Journal of Clinical Epidemiology*. 2010;**63**:1179–94. doi:10.1016/j.jclinepi.2010.04.011
- 11 Wilson I, Bohm E, Lübbecke A, *et al*. Orthopaedic registries with patient-reported outcome measures. *EFORT Open Rev* 2019;**4**:357–67. doi:10.1302/2058-5241.4.180080
- 12 Flynn KE, Dew MA, Lin L, *et al*. Reliability and construct validity of PROMIS® measures for patients with heart failure who undergo heart transplant. *Qual Life Res* 2015;**24**:2591–9. doi:10.1007/s11136-015-1010-y
- 13 Choi SW, Reise SP, Pilkonis PA, *et al*. Efficiency of static and computer adaptive short forms compared to full-length measures of depressive symptoms. *Qual Life Res* 2010;**19**:125–36. doi:10.1007/s11136-009-9560-5
- 14 Segawa E, Schalet B, Cella D. A comparison of computer adaptive tests (CATs) and short forms in terms of accuracy and number of items administered using PROMIS profile. *Qual Life Res* 2020;**29**:213–21. doi:10.1007/s11136-019-02312-8



- 1  
2  
449 Prevalent Conditions in a Defined American Population. *Mayo Clin Proc* 2013;**88**:56–67.  
450 doi:10.1016/j.mayocp.2012.08.020  
5
- 451 30 Makhni EC, Meadows M, Hamamoto JT, *et al.* Patient Reported Outcomes Measurement Information  
452 System (PROMIS) in the upper extremity: the future of outcomes reporting? *J Shoulder Elbow Surg*  
453 2017;**26**:352–7. doi:10.1016/j.jse.2016.09.054  
9
- 454 31 Beleckas CM, Prather H, Guattery J, *et al.* Anxiety in the orthopedic patient: using PROMIS to assess  
455 mental health. *Qual Life Res* 2018;**27**:2275–82. doi:10.1007/s11136-018-1867-7  
12
- 456 32 McCrabb S, Baker AL, Attia J, *et al.* Comorbid tobacco and other substance use and symptoms of anxiety  
457 and depression among hospitalised orthopaedic trauma patients. *BMC Psychiatry* 2019;**19**:28.  
458 doi:10.1186/s12888-019-2021-y  
16
- 459 33 Perruccio AV, Davis AM, Hogg-Johnson S, *et al.* Importance of self-rated health and mental well-being in  
460 predicting health outcomes following total joint replacement surgery for osteoarthritis. *Arthritis Care Res*  
461 2011;**63**:973–81. <https://onlinelibrary.wiley.com/doi/abs/10.1002/acr.20467>  
20
- 462 34 Hopman WM, Towheed T, Anastassiades T, *et al.* Canadian normative data for the SF-36 health survey.  
463 *CMAJ* 2000;**163**:265–71. <https://www.cmaj.ca/content/163/3/265.short> (accessed 8 Nov 2020).  
23
- 464 35 Raad M, Amin RM, El Abiad JM, *et al.* Preoperative Patient Functional Status Is an Independent Predictor  
465 of Outcomes After Primary Total Hip Arthroplasty. *Orthopedics* 2019;**42**:e326–30. doi:10.3928/01477447-  
466 20190321-01  
25
- 467 36 Lyman S, Lee Y-Y, Franklin PD, *et al.* Validation of the KOOS, JR: A Short-form Knee Arthroplasty  
468 Outcomes Survey. *Clin Orthop Relat Res* 2016;**474**:1461–71. doi:10.1007/s11999-016-4719-1  
28
- 469 37 Gullledge CM, Lizzio VA, Smith DG, *et al.* What Are the Floor and Ceiling Effects of Patient-Reported  
470 Outcomes Measurement Information System Computer Adaptive Test Domains in Orthopaedic Patients?  
471 A Systematic Review. *Arthroscopy* Published Online First: 6 January 2020.  
472 doi:10.1016/j.arthro.2019.09.022  
31
- 473 38 Maggie E. Horn, Emily K. Reinke, Logan J. Couce, Bryce B. Reeve, Leila Ledbetter, Steven Z. George.  
474 Reporting and utilization of Patient-Reported Outcomes Measurement Information System? (PROMIS)  
475 measures in orthopedic research and practice: a systematic review. *J Orthop Surg Res*  
476 doi:10.1186/s13018-020-02068-9  
36
- 477 39 O'Hara NN, Richards JT, Overmann A, *et al.* Is PROMIS the new standard for patient-reported outcomes  
478 measures in orthopaedic trauma research? *Injury* Published Online First: 25 October 2019.  
479 doi:10.1016/j.injury.2019.10.076  
41
- 480 40 Cheung EC, Moore LK, Flores SE, *et al.* Correlation of PROMIS with Orthopaedic Patient-Reported  
481 Outcome Measures. *JBJS Rev* 2019;**7**:e9. doi:10.2106/JBJS.RVW.18.00190  
45
- 482 41 Perruccio AV, Gandhi R, Rampersaud YR, *et al.* Heterogeneity in health status and the influence of patient  
483 characteristics across patients seeking musculoskeletal orthopaedic care - a cross-sectional study. *BMC*  
484 *Musculoskelet Disord* 2013;**14**:83. doi:10.1186/1471-2474-14-83  
52
- 485 42 Chen Q, Hayman LL, Shmerling RH, *et al.* Characteristics of Chronic Pain Associated with Sleep Difficulty  
486 in Older Adults: The Maintenance of Balance, Independent Living, Intellect, and Zest in the Elderly  
487 (MOBILIZE) Boston Study. *Journal of the American Geriatrics Society*. 2011;**59**:1385–92.  
56  
57  
58  
59  
60

1  
2  
3  
4  
5  
6  
7  
8  
9  
10  
11  
12  
13  
14  
15  
16  
17  
18  
19  
20  
21  
22  
23  
24  
25  
26  
27  
28  
29  
30  
31  
32  
33  
34  
35  
36  
37  
38  
39  
40  
41  
42  
43  
44  
45  
46  
47  
48  
49  
50  
51  
52  
53  
54  
55  
56  
57  
58  
59  
60

doi:10.1111/j.1532-5415.2011.03544.x

- 43 McCurry SM, Von Korff M, Vitiello MV, *et al.* Frequency of comorbid insomnia, pain, and depression in older adults with osteoarthritis: predictors of enrollment in a randomized treatment trial. *J Psychosom Res* 2011;**71**:296–9. doi:10.1016/j.jpsychores.2011.05.012
- 44 Smith MT, Quartana PJ, Okonkwo RM, *et al.* Mechanisms by which sleep disturbance contributes to osteoarthritis pain: a conceptual model. *Curr Pain Headache Rep* 2009;**13**:447–54. doi:10.1007/s11916-009-0073-2
- 45 Cole JC, Dubois D, Kosinski M. Use of patient-reported sleep measures in clinical trials of pain treatment: a literature review and synthesis of current sleep measures and a conceptual model of sleep disturbance in pain. *Clinical Therapeutics*. 2007;**29**:2580–8. doi:10.1016/j.clinthera.2007.12.005
- 46 Goldman SE, Stone KL, Ancoli-Israel S, *et al.* Poor sleep is associated with poorer physical performance and greater functional limitations in older women. *Sleep* 2007;**30**:1317–24. doi:10.1093/sleep/30.10.1317
- 47 Guccione AA, Felson DT, Anderson JJ, *et al.* The effects of specific medical conditions on the functional limitations of elders in the Framingham Study. *Am J Public Health* 1994;**84**:351–8. doi:10.2105/ajph.84.3.351
- 48 McCracken LM, Iverson GL. Disrupted sleep patterns and daily functioning in patients with chronic pain. *Pain Res Manag* 2002;**7**:75–9. doi:10.1155/2002/579425
- 49 Finan PH, Goodin BR, Smith MT. The association of sleep and pain: an update and a path forward. *J Pain* 2013;**14**:1539–52. doi:10.1016/j.jpain.2013.08.007
- 50 Olde Rikkert MGM, van der Wees PJ, Schoon Y, *et al.* Using Patient Reported Outcomes Measures to Promote Integrated Care. *Int J Integr Care* 2018;**18**:8. doi:10.5334/ijic.3961
- 51 Wees PJVANDER, Van Der Wees PJ, Nijhuis-Van Der MW, *et al.* Integrating the Use of Patient-Reported Outcomes for Both Clinical Practice and Performance Measurement: Views of Experts from 3 Countries. *Milbank Quarterly*. 2014;**92**:754–75. doi:10.1111/1468-0009.12091
- 52 Porter ME, Others. What is value in health care. *N Engl J Med* 2010;**363**:2477–81. [http://www.academia.edu/download/30781672/2011-1\\_Porter\\_What-is-value-in-health-care\\_Appendix-1.pdf](http://www.academia.edu/download/30781672/2011-1_Porter_What-is-value-in-health-care_Appendix-1.pdf)





**STROBE 2007 (v4) Statement—Checklist of items that should be included in reports of *cohort studies***

| Section/Topic                | Item # | Recommendation                                                                                                                                                                       | Reported on page # |
|------------------------------|--------|--------------------------------------------------------------------------------------------------------------------------------------------------------------------------------------|--------------------|
| <b>Title and abstract</b>    | 1      | (a) Indicate the study's design with a commonly used term in the title or the abstract                                                                                               | 1                  |
|                              |        | (b) Provide in the abstract an informative and balanced summary of what was done and what was found                                                                                  | 2                  |
| <b>Introduction</b>          |        |                                                                                                                                                                                      |                    |
| Background/rationale         | 2      | Explain the scientific background and rationale for the investigation being reported                                                                                                 | 4                  |
| Objectives                   | 3      | State specific objectives, including any prespecified hypotheses                                                                                                                     | 4                  |
| <b>Methods</b>               |        |                                                                                                                                                                                      |                    |
| Study design                 | 4      | Present key elements of study design early in the paper                                                                                                                              | 5-6                |
| Setting                      | 5      | Describe the setting, locations, and relevant dates, including periods of recruitment, exposure, follow-up, and data collection                                                      | 5-6                |
| Participants                 | 6      | (a) Give the eligibility criteria, and the sources and methods of selection of participants. Describe methods of follow-up                                                           | 5-6                |
|                              |        | (b) For matched studies, give matching criteria and number of exposed and unexposed                                                                                                  | n/a                |
| Variables                    | 7      | Clearly define all outcomes, exposures, predictors, potential confounders, and effect modifiers. Give diagnostic criteria, if applicable                                             | 5-7                |
| Data sources/<br>measurement | 8*     | For each variable of interest, give sources of data and details of methods of assessment (measurement). Describe comparability of assessment methods if there is more than one group | 5-7                |
| Bias                         | 9      | Describe any efforts to address potential sources of bias                                                                                                                            | 5                  |
| Study size                   | 10     | Explain how the study size was arrived at                                                                                                                                            | 5                  |
| Quantitative variables       | 11     | Explain how quantitative variables were handled in the analyses. If applicable, describe which groupings were chosen and why                                                         | 5-7                |
| Statistical methods          | 12     | (a) Describe all statistical methods, including those used to control for confounding                                                                                                | 7                  |
|                              |        | (b) Describe any methods used to examine subgroups and interactions                                                                                                                  | 7                  |
|                              |        | (c) Explain how missing data were addressed                                                                                                                                          | 7                  |
|                              |        | (d) If applicable, explain how loss to follow-up was addressed                                                                                                                       | 7                  |
|                              |        | (e) Describe any sensitivity analyses                                                                                                                                                | 7                  |
| <b>Results</b>               |        |                                                                                                                                                                                      |                    |

|                          |     |                                                                                                                                                                                                                                                                                                                                                                                                               |                    |
|--------------------------|-----|---------------------------------------------------------------------------------------------------------------------------------------------------------------------------------------------------------------------------------------------------------------------------------------------------------------------------------------------------------------------------------------------------------------|--------------------|
| Participants             | 13* | (a) Report numbers of individuals at each stage of study—eg numbers potentially eligible, examined for eligibility, confirmed eligible, included in the study, completing follow-up, and analysed<br>(b) Give reasons for non-participation at each stage<br>(c) Consider use of a flow diagram                                                                                                               | 8<br>n/a<br>n/a    |
| Descriptive data         | 14* | (a) Give characteristics of study participants (eg demographic, clinical, social) and information on exposures and potential confounders<br>(b) Indicate number of participants with missing data for each variable of interest<br>(c) Summarise follow-up time (eg, average and total amount)                                                                                                                | 8<br>tables<br>n/a |
| Outcome data             | 15* | Report numbers of outcome events or summary measures over time                                                                                                                                                                                                                                                                                                                                                | 8                  |
| Main results             | 16  | (a) Give unadjusted estimates and, if applicable, confounder-adjusted estimates and their precision (eg, 95% confidence interval). Make clear which confounders were adjusted for and why they were included<br>(b) Report category boundaries when continuous variables were categorized<br>(c) If relevant, consider translating estimates of relative risk into absolute risk for a meaningful time period | 8-10<br>n/a<br>n/a |
| Other analyses           | 17  | Report other analyses done—eg analyses of subgroups and interactions, and sensitivity analyses                                                                                                                                                                                                                                                                                                                | n/a                |
| <b>Discussion</b>        |     |                                                                                                                                                                                                                                                                                                                                                                                                               |                    |
| Key results              | 18  | Summarise key results with reference to study objectives                                                                                                                                                                                                                                                                                                                                                      | 15                 |
| <b>Limitations</b>       |     |                                                                                                                                                                                                                                                                                                                                                                                                               |                    |
| Interpretation           | 20  | Give a cautious overall interpretation of results considering objectives, limitations, multiplicity of analyses, results from similar studies, and other relevant evidence                                                                                                                                                                                                                                    | 16                 |
| Generalisability         | 21  | Discuss the generalisability (external validity) of the study results                                                                                                                                                                                                                                                                                                                                         | 16                 |
| <b>Other information</b> |     |                                                                                                                                                                                                                                                                                                                                                                                                               |                    |
| Funding                  | 22  | Give the source of funding and the role of the funders for the present study and, if applicable, for the original study on which the present article is based                                                                                                                                                                                                                                                 | 17                 |

\*Give information separately for cases and controls in case-control studies and, if applicable, for exposed and unexposed groups in cohort and cross-sectional studies.

**Note:** An Explanation and Elaboration article discusses each checklist item and gives methodological background and published examples of transparent reporting. The STROBE checklist is best used in conjunction with this article (freely available on the Web sites of PLoS Medicine at <http://www.plosmedicine.org/>, Annals of Internal Medicine at <http://www.annals.org/>, and Epidemiology at <http://www.epidem.com/>). Information on the STROBE Initiative is available at [www.strobe-statement.org](http://www.strobe-statement.org).
